# Supplementary material for: Evaluation of Artesunate-mefloquine as a Novel Alternative Treatment for Schistosomiasis in African Children (SchistoSAM): protocol of a proof-of-concept, open-label, two-arm, individually-randomised controlled trial
Source: HighWire-hosted journal article supplement (doi:10.1136/bmjopen-2020-047147), 2021-06-01
Supplement: bmjopen-2020-047147supp001_data_supplement.pdf [file bmjopen-2020-047147supp001_data_supplement.pdf]

Schisto/SOP/CLIN/01

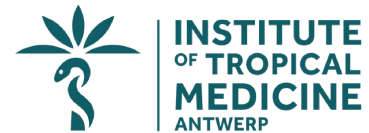

## Additional file 2

**Evaluation de l'artésunate-méfloquine comme traitement alternatif de la schistosomiase chez les enfants d'âge scolaire au Sénégal (SchistoSAM)**

**Titre:** SOP de l'évaluation des critères d'éligibilité ainsi que de l'efficacité clinique et du suivi des traitements dans l'étude SchistoSAM  
**Numéro:** Schisto/SOP/CLIN/01  
**Version :** 2.0  
**Date :** 20/JAN/2020

## 1. Domaine et application

L'étude SchistoSAM a pour but d'évaluer l'efficacité parasitologique et clinique ainsi que la tolérance de l'artésunate-méfloquine (AM), en comparaison au praziquantel (PZQ), dans le traitement des enfants Sénégalais en âge scolaire atteints de schistosomiase. L'étude évaluera aussi des nouveaux outils biologiques pour suivre l'efficacité du traitement.

Ce SOP s'adresse en particulier aux **médecin** et **infirmiers** de l'équipe locale d'étude, qui auront la responsabilité d'évaluer cliniquement les enfants et de suivre et prendre en charge les éventuels événements indésirables liés au traitement. Il décrit l'évaluation médicale initiale (y compris la vérification des critères d'éligibilité), intermédiaire (à 24 semaines) et finale (à 48 semaines) à réaliser. Il décrit aussi la manière d'administrer les médicaments (une dose unique administrée une seule fois dans le bras PZQ ; 3 traitements de 3 jours administrés à 6 semaines d'intervalle dans le bras AM) et le suivi nécessaire après chaque administration.

## 2. Responsabilités

| Fonction                                                           | Activités                                                                                                                                                                                                                                                                                                                                                                                                                                                                                                                                                                                                                                                             |
|--------------------------------------------------------------------|-----------------------------------------------------------------------------------------------------------------------------------------------------------------------------------------------------------------------------------------------------------------------------------------------------------------------------------------------------------------------------------------------------------------------------------------------------------------------------------------------------------------------------------------------------------------------------------------------------------------------------------------------------------------------|
| <i>Investigateur Principal et co-investigateur médical du Pays</i> | <ul style="list-style-type: none"> <li>▪ Organisation, avec l'intervention de la co-investigatrice médicale et du coordinateur IMT, de la <b>formation</b> des <b>médecins</b> et <b>infirmiers</b> de l'équipe locale d'étude, pour permettre la bonne application de ce SOP (compréhension des critères d'inclusion/exclusion, des évaluations médicales et des suivis des événements indésirables (EI) liés aux traitements</li> <li>▪ <b>Supervision et coaching</b> au cours de l'étude des <b>médecins</b> et <b>infirmiers</b> de l'équipe locale d'étude, avec l'appui de l'équipe IMT, quant à la conformité des actions et décisions avec ce SOP</li> </ul> |
| <i>Médecin(s) de l'équipe locale d'étude</i>                       | <ul style="list-style-type: none"> <li>▪ Exécution/supervision de l'<b>évaluation médicale</b> initiale avec vérification des critères médicaux d'inclusion/exclusion, ainsi que des évaluations médicales intermédiaire et finale</li> </ul>                                                                                                                                                                                                                                                                                                                                                                                                                         |

## Schisto/SOP/CLIN/01

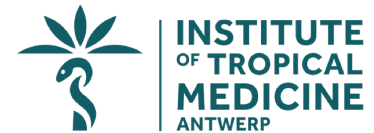

|                                                |                                                                                                                                                                                                                                                                                                                                                                                                                                                                                                                                                                                                                                                                                                                                                                                                                                                                      |
|------------------------------------------------|----------------------------------------------------------------------------------------------------------------------------------------------------------------------------------------------------------------------------------------------------------------------------------------------------------------------------------------------------------------------------------------------------------------------------------------------------------------------------------------------------------------------------------------------------------------------------------------------------------------------------------------------------------------------------------------------------------------------------------------------------------------------------------------------------------------------------------------------------------------------|
|                                                | <ul style="list-style-type: none"> <li>▪ Décision de l'<b>instauration des traitements AM successifs</b> et de l'éventuel arrêt à cause d'événement indésirables graves (EIG)</li> <li>▪ <b>Prise en charge</b> sur les sites d'étude ou par téléphone des EI, ainsi qu'à l'hôpital de Richard-Toll en cas d'EIG nécessitant une admission; suivi du patient jusqu'à la résolution complète du problème</li> <li>▪ <b>Rapport des résultats</b> (évaluations, administrations de médicaments, ...) dans les fiches de recueil des données électroniques (« eCRF ») appropriées</li> </ul>                                                                                                                                                                                                                                                                            |
| <b>Infirmier(s) de l'équipe locale d'étude</b> | <ul style="list-style-type: none"> <li>▪ Appui au(x) <b>médecin(s)</b> dans l'évaluation médicale initiale, intermédiaire et finale</li> <li>▪ Surveillance active lors des visites d'administration des traitements et des visites de suivi (Jour 7 après chaque traitement) avec collecte des symptômes</li> <li>▪ Collecte systématique au cours des visites d'évaluation parasitologique (semaines 4, 10 et 16) des symptômes éventuellement survenus entre le J 7 et les visites en question</li> <li>▪ Communication immédiate avec le <b>médecin</b> en cas de symptômes modérés ou sévères <i>actives</i>.</li> <li>▪ Prise en charge des soins primaires lors de symptôme léger</li> <li>▪ Distribution des médicaments de l'étude sous supervision médicale selon la dose appropriée</li> <li>▪ Aide à l'enregistrement des données dans l'eCRF</li> </ul> |
| <b>Relais communautaires</b>                   | <ul style="list-style-type: none"> <li>▪ Appel et regroupement des participants les jours des visites d'étude</li> <li>▪ Support aux différentes activités logistiques connexes à l'étude sur le terrain</li> </ul>                                                                                                                                                                                                                                                                                                                                                                                                                                                                                                                                                                                                                                                  |
| <b>Radiologues de l'étude</b>                  | <ul style="list-style-type: none"> <li>▪ Exécution des échographies abdominales lors des évaluations initiale, intermédiaire et finale selon le canevas OMS de référence</li> <li>▪ Rapport des résultats dans les CRF papier appropriés</li> </ul>                                                                                                                                                                                                                                                                                                                                                                                                                                                                                                                                                                                                                  |

### 3. Préparation et déroulement schématique des visites d'étude

L'essai clinique proprement dit sera précédé :

- 1) d'un recensement des enfants scolarisés à l'école primaire dans les villages identifiés pour l'étude,
- 2) de séances d'information communautaire sur le projet,
- 3) d'un premier triage sur base des critères d'inclusion et d'exclusion par les **relais communautaires**. Ils remplissent le eCRF « **Eligibilité** »

| CRITERES D'INCLUSION |                           | Oui                      | Non                      |
|----------------------|---------------------------|--------------------------|--------------------------|
| 1                    | Enfant âgés de 6 à 14 ans | <input type="checkbox"/> | <input type="checkbox"/> |

## Schisto/SOP/CLIN/01



|                             |                                                                                                                                           |                          |                          |
|-----------------------------|-------------------------------------------------------------------------------------------------------------------------------------------|--------------------------|--------------------------|
| 2                           | Inscrit dans l'une des écoles primaires sélectionnées pour l'étude                                                                        | <input type="checkbox"/> | <input type="checkbox"/> |
| 3                           | Consentement libre et éclairé signé par les parents/tuteurs et un délégué de l'équipe de l'étude                                          | <input type="checkbox"/> | <input type="checkbox"/> |
| <b>CRITERES D'EXCLUSION</b> |                                                                                                                                           | Oui                      | Non                      |
| 1                           | Séjour d'un mois ou plus en dehors de son village dans les 5 prochains mois                                                               | <input type="checkbox"/> | <input type="checkbox"/> |
| 2.1                         | Epilepsie ou antécédents d'épilepsie/convulsions répétées non-fébriles                                                                    | <input type="checkbox"/> | <input type="checkbox"/> |
| 2.2                         | Antécédents de maladie psychiatrique (dépression, anxiété généralisée, psychose, schizophrénie ou autres troubles psychiatriques majeurs) | <input type="checkbox"/> | <input type="checkbox"/> |
| 3.                          | Traitement chronique en cours pour quelque maladie que ce soit                                                                            | <input type="checkbox"/> | <input type="checkbox"/> |

- 4) de la signature par les parents et enfants d'un consentement éclairé pour effectuer le screening parasitologique et éventuellement participer à l'inclusion dans l'essai clinique,
- 5) d'un screening parasitologique par l'équipe de laboratoire, à la recherche d'enfants éligibles, c'est-à-dire infectés (présentant des œufs de schistosomes dans les urines et/ou selles par examen microscopique). Veuillez-vous référer au Schisto/SOP/LAB/01\_03\_07 pour les procédures normalisées de collecte des échantillons d'urine et de selle au dépistage.

Une liste des participants éligibles sera établie pour l'équipe d'étude (avec le nom, le numéro d'identification et le lieu de résidence des enfants).

Une planification précise sera élaborée selon la Figure 1, avec les dates des visites par village d'étude identifié, les bras d'étude ainsi que le nombre et le profil du personnel d'étude nécessaire.

## Schisto/SOP/CLIN/01

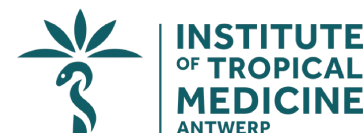

Figure 1: Diagramme simplifié de l'étude

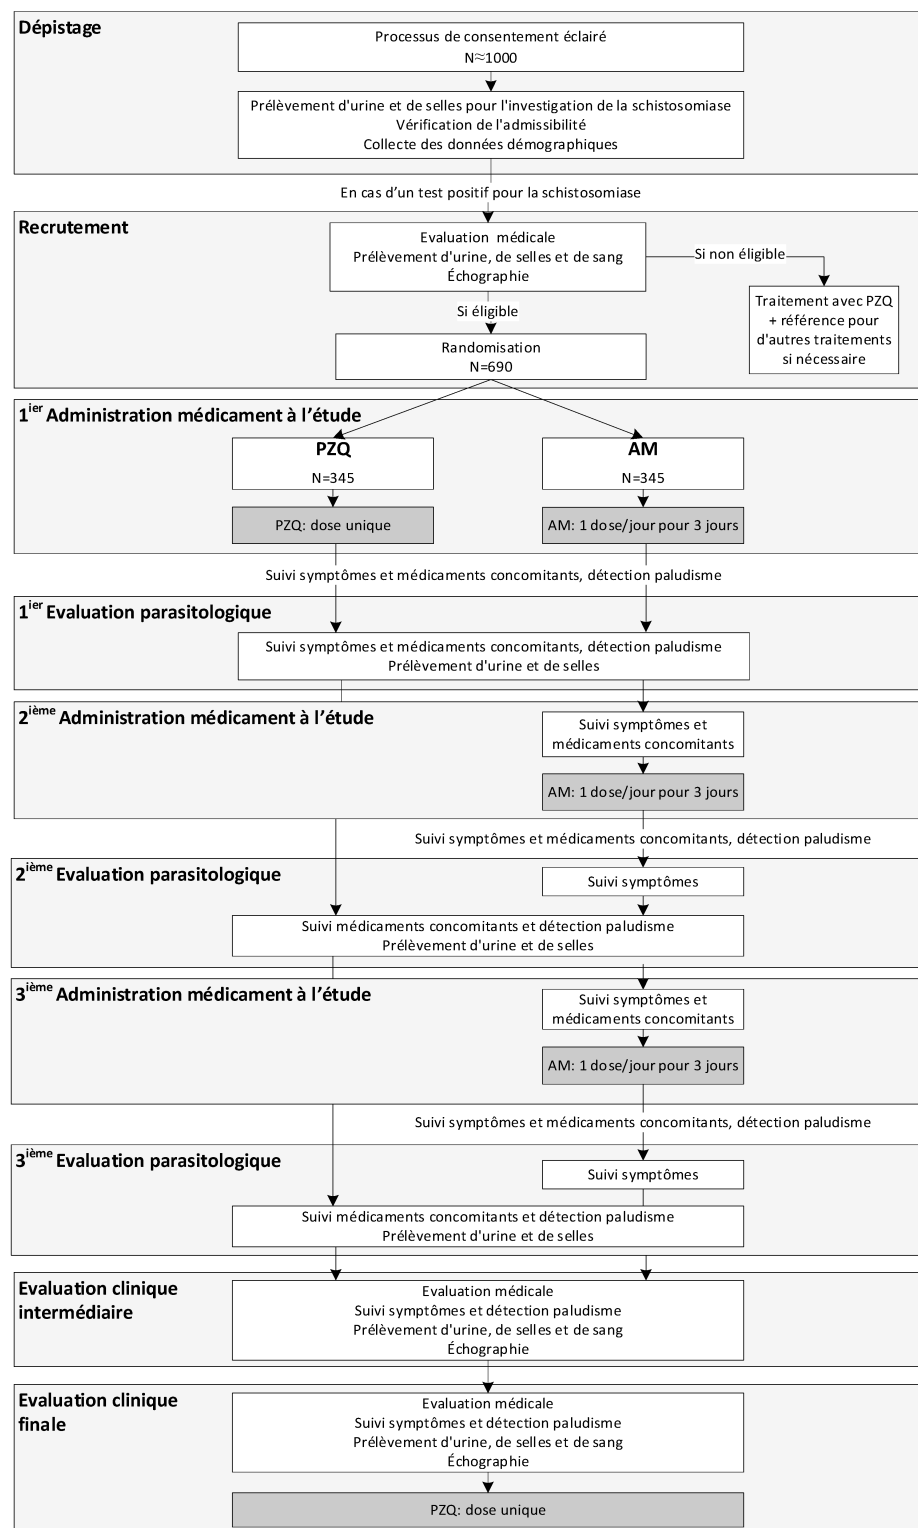

**Schisto/SOP/CLIN/01**

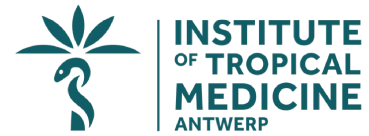

#### **4. Procédures par visite**

Une liste journalières des participants éligibles sera établie pour l'équipe d'étude (avec le nom, le numéro d'identification et le lieu de résidence des enfants).

Pour chaque visite, **les relais communautaires** rassembleront les enfants participants sur le lieu de la visite d'étude (école ou poste de santé du village, selon les circonstances).

La présence ou l'absence de l'enfant sera noté sur la liste préétablie des visites prévues pour la journée. En cas d'une visite manquée, une autre tentative doit être faite le lendemain. L'intervalle maximum dans lequel la visite peut être effectuée diffère par visite et sera précisé dans les paragraphes pertinents. Au cours de la prochaine visite d'étude physique, toutefois, on devra demander au participant/parent la raison pour laquelle il n'a pas été possible de communiquer avec lui et, au besoin, adapter les procédures pour ce participant.

Lors de chaque visite, le fichier correspondant au participant sera sélectionné sur la tablette informatique.

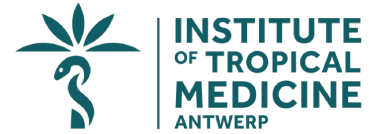

## Schisto/SOP/CLIN/01

### 4.1. Visite de recrutement

Cette visite comprend (1) rapport des antécédents médicaux (2) l'évaluation médicale, (3) la vérification des critères inclusion/exclusion et (4) la randomisation.

Deux **infirmiers** travailleront avec deux **médecins** pendant deux jours consécutifs pour évaluer les enfants d'étude. L'**infirmier** appellera les participants un par un en fonction de la liste établie préalablement. Sur cette liste il indiquera la présence ou absence de l'enfant. Sur la base du numéro d'identification, il récupèrera le formulaire de consentement éclairé (déjà signé lors de la visite de screening).

Le **médecin** s'assurera qu'il ne reste pas de questions ou d'incertitudes concernant la participation à l'étude et vérifiera que le **consentement éclairé** a été signé. Il **contresignera** également le consentement éclairé si le participant donne son accord définitif.

En cas de refus final à ce moment, l'enfant n'est pas inclus dans l'essai. Il recevra de la part de l'**infirmier** un traitement au praziquantel (PZQ) selon le schéma classique (40 mg/kg).

#### 4.1.1. Antécédents médicaux

- Le **médecin** enregistrera les antécédents médicaux pertinents dans l'eCRF « **Antécédents médicaux** ».

Les antécédents médicaux pertinents comprennent, mais n'est pas limité à, toute condition qui:

- influence la capacité de l'enfant à donner son consentement*
- influence la capacité de l'enfant à venir à intervalles réguliers aux visites d'étude prévues.*
- modifie la métabolisation du médicament (e.g. maladies graves du foie, ...)*
- augmente le risque d'effets secondaires (e.g. arythmies, ...)*

La présence de certaines conditions entraîne automatiquement l'exclusion de l'étude :

- Si l'enfant souffre d'**épilepsie** ou présente des **épisodes répétés de convulsions non-liées à la fièvre**, ou s'il souffre de troubles psychiatriques.*
- Si une **fièvre** (> 38°C) est documentée dans les deux jours qui précèdent la visite. Dans ces cas, l'enfant doit être référé au poste de santé pour les soins nécessaires (avec instructions écrites du **médecin**)*
- Si l'enfant prend actuellement un **traitement chronique** (pour quelque maladie que ce soit) ou s'il a été **traité dans les 3 mois précédents avec du praziquantel ou un traitement antipaludique à base d'artémisinine.***
- Si l'enfant a des **allergies connues** à l'un des trois médicaments à l'étude (praziquantel, méfloquine, artésunate/artemether)*

:

#### 4.1.2. Evaluation médicale

- L'**infirmier** pèsera et mesurera l'enfant à l'aide de la balance et de la toise (l'enfant doit enlever ses chaussures).

## Schisto/SOP/CLIN/01

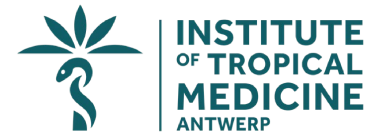

- **L'infirmier** prendra la température avec un thermomètre tympanique. Afin d'obtenir une bonne lecture, il suivra les instructions suivantes :
  - Retirez le thermomètre du socle. Appuyez sur le bouton Marche/arrêt. Pendant un autocontrôle interne, tous les voyants s'affichent à l'écran. La dernière température prise s'affiche ensuite pendant 5 secondes.
  - L'indicateur d'embout jetable clignote pour signaler qu'un embout jetable est nécessaire. Fixez un embout jetable en poussant la sonde du thermomètre directement dans l'embout jetable à l'intérieur de la boîte, puis en la ressortant.  
*Remarque* : Le thermomètre ThermoScan Braun ne fonctionne pas tant qu'il ne comporte pas d'embout jetable.
  - Pour obtenir des mesures précises, assurez-vous que l'embout jetable est propre, avant chaque relevé de température. Sinon, nettoyez-le. En cas de besoin appuyez sur le bouton Eject pour retirer et jeter l'embout jetable utilisé et installez-en un nouveau et propre.
  - Sélectionnez l'âge à l'aide du bouton Age Precision™. Appuyez sur le bouton pour passer d'un groupe d'âge à l'autre. ThermoScan affiche par défaut la dernière tranche d'âge utilisée si vous ne la modifiez pas

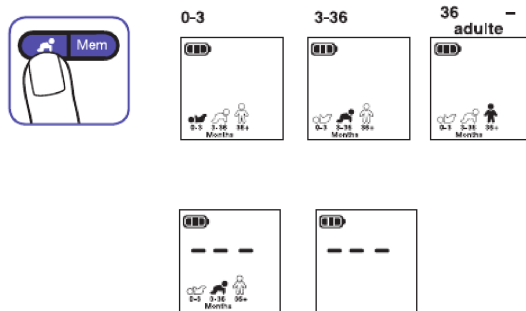

- Ajustez bien la sonde dans le conduit auditif, puis poussez et relâchez le bouton Start. Le voyant lumineux ExacTemp clignote pendant la prise de température. Si la sonde a été correctement introduite dans le conduit auditif pendant la mesure, un long bip signale la fin de la mesure. Le résultat s'affiche à l'écran

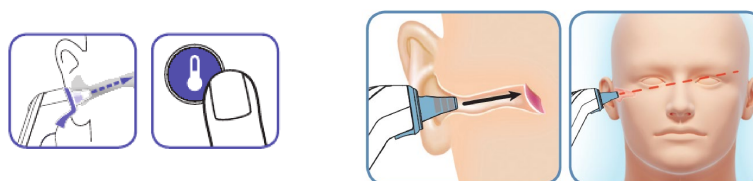

- **Le médecin** notera le poids et la taille dans l'eCRF « **Evaluation médicale** » ; le programme donnera automatiquement l'index de masse corporelle (IMC), selon la formule poids (kg)/taille (m) x taille (m).
  - Un IMC inférieur à 3 déviation standard (DS) indique une malnutrition sévère et est un critère d'exclusion de l'étude ; l'enfant doit être référé au poste de santé pour les soins

## Schisto/SOP/CLIN/01



*nécessaires (avec instructions écrites du **médecin**)*. Le tableau ci-dessous résume les IMC en dessous desquels un enfant doit être exclu de l'essai et référé.

| IMC pour âge et sexe basé sur les données de l'OMS (z-scores) |       |        |
|---------------------------------------------------------------|-------|--------|
| Age                                                           | Fille | Garçon |
|                                                               | -3DS  | -3DS   |
| 6                                                             | 11.7  | 12.2   |
| 7                                                             | 11.8  | 12.3   |
| 8                                                             | 12.0  | 12.5   |
| 9                                                             | 12.2  | 12.7   |
| 10                                                            | 12.5  | 12.9   |
| 11                                                            | 12.9  | 13.2   |
| 12                                                            | 13.4  | 13.6   |
| 13                                                            | 13.8  | 14     |
| 14                                                            | 14.2  | 14.5   |

IMC = Indice de masse corporelle, OMS = Organisation Mondiale de la Santé, DS = déviation standard

- En cas de fièvre (température > 38°C) **le médecin** notera la température dans la partie « Remarques » de l'eCRF.
  - *L'enfant doit être référé au poste de santé pour les soins nécessaires (avec instructions écrites du **médecin**). Le participant est exclu de l'étude.*
- **Le médecin** examinera l'enfant, en particulier la région abdominale. Il enregistrera dans l'eCRF « **Evaluation médicale** » de façon systématique les éléments suivants : absence/présence de (1) extension du foie en dessous du gril costal de plus de 2 cm; (2) élargissement de la rate; (3) ascite ; (4) circulation collatérale péri-ombilicale ; (5) toute autre signe clinique de maladie grave
  - *Si une ascite et/ou une circulation collatérale est observée, la probabilité est grande que l'enfant souffre d'hypertensions portale avancée ; dans ce cas, il doit être exclu de l'essai et référé au poste de santé pour les soins nécessaires et un traitement au PZQ (avec instructions écrites du **médecin**).*
  - *Toute autre signe de maladie grave doit être enregistré précisément dans l'eCRF, et est un critère d'exclusion de l'essai.*
- **L'infirmier** prélèvera une goutte de sang au doigt de l'enfant (après désinfection) avec une aiguille rétractable et effectuera la mesure du taux d'hémoglobine avec l'appareil HemoCue (Voir Scisto/Scisto/SOP/LAB/02). Au cours du prélèvement de sang pour l'évaluation de la concentration en Hémoglobine, appliquez de nouveau une légère pression vers le bout du doigt jusqu'à ce qu'une autre goutte de sang apparaisse et déposez 4 gouttes de sang séparément sur le papier filtre.  
Découper le papier filtre pour séparer la partie qui restera à l'IRESEF de celle qui sera envoyée à l'ITM. (voir Schisto/SOP/LAB/08).



## Schisto/SOP/CLIN/01

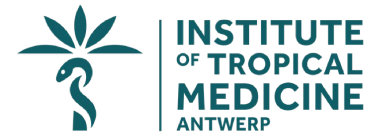

- **Le médecin** notera le résultat obtenu (taux d'hémoglobine) dans l'eCRF « **Evaluation médicale** »
  - Si le taux d'hémoglobine est inférieur à 7 g/dl, l'enfant doit être exclu de l'essai et référé au poste de santé pour les soins nécessaires (avec instructions écrites du **médecin**).

## 4.1.2. Vérification des critères d'inclusion/exclusion

- A la fin de l'évaluation médicale, **le médecin** doit compléter la liste récapitulative suivante des critères d'inclusion et d'exclusion dans l'eCRF « **Eligibilité** » et cocher les cases OUI ou NON après chacun des items énumérés.

| CRITERES D'INCLUSION |                                                                                                                                                     | Oui                      | Non                      |
|----------------------|-----------------------------------------------------------------------------------------------------------------------------------------------------|--------------------------|--------------------------|
| 4                    | Infecté par la schistosomiase (i.e. présentant des œufs de <i>Schistosoma</i> spp. dans les urines et/ou les selles)                                | <input type="checkbox"/> | <input type="checkbox"/> |
| 5                    | Consentement libre et éclairé contresigné par le <b>médecin</b>                                                                                     | <input type="checkbox"/> | <input type="checkbox"/> |
| CRITERES D'EXCLUSION |                                                                                                                                                     | Oui                      | Non                      |
| 2.1                  | Epilepsie ou antécédents d'épilepsie/convulsions répétées non-fébriles                                                                              | <input type="checkbox"/> | <input type="checkbox"/> |
| 2.2                  | Antécédents de maladie psychiatrique (dépression, anxiété généralisée, psychose, schizophrénie ou autres troubles psychiatriques majeurs)           | <input type="checkbox"/> | <input type="checkbox"/> |
| 2.3                  | Antécédents d'allergie connue à l'un des trois médicaments à l'étude (praziquantel, méfloquine, artésunate/artemether)                              | <input type="checkbox"/> | <input type="checkbox"/> |
| 3.                   | Traitement chronique en cours pour quelque maladie que ce soit                                                                                      | <input type="checkbox"/> | <input type="checkbox"/> |
| 4.1.                 | Malnutrition sévère (IMC < 3DS des normes OMS)                                                                                                      | <input type="checkbox"/> | <input type="checkbox"/> |
| 4.2.                 | Signes cliniques d'hypertension portale sévère (ascite et/ou circulation collatérale)                                                               | <input type="checkbox"/> | <input type="checkbox"/> |
| 4.3.                 | Toute maladie grave sous-jacente basée sur jugement clinique                                                                                        | <input type="checkbox"/> | <input type="checkbox"/> |
| 4.4.                 | Taux d'hémoglobine < 7 g/dl (HemoCue)                                                                                                               | <input type="checkbox"/> | <input type="checkbox"/> |
| 5.                   | Toute maladie fébrile documentée dans les 2 jours précédents ou lors de l'évaluation                                                                | <input type="checkbox"/> | <input type="checkbox"/> |
| 6.                   | Exposition au PZQ (praziquantel) ou à l'ACT (Artemisinin-based Combination Therapy, e.i. traitement antipaludique) au cours des trois derniers mois | <input type="checkbox"/> | <input type="checkbox"/> |

- Si la réponse est OUI à tous les critères d'inclusions et NON à tous les critères d'exclusion, **le médecin** peut inclure l'enfant dans l'essai et procéder à la randomisation (voir ci-dessous).
- Si la réponse est OUI à au moins un des critères d'exclusion ou NON à au moins un des critères d'inclusion, l'enfant est exclu de l'essai. Le **médecin** remplira l'eCRF « Fin étude » ;
  - Dans tous ces cas, il recevra de la part de **l'infirmier** un traitement au praziquantel (PZQ) selon le schéma classique (40 mg/kg).

## Schisto/SOP/CLIN/01



- Dans certaines circonstances, si des soins immédiats sont nécessaires, le médecin réfèrera l'enfant au poste de santé ou à l'hôpital selon son jugement clinique, et avec des instructions écrites précises pour l'agent de santé. Il s'assurera que la prise en charge complète est correcte.
- Le médecin notera la date de recrutement et la décision finale (inclusion oui ou non) dans le « Journal de dépistage et de recrutement ».

### 4.1.3. Randomisation

- Pour les enfants inclus, le médecin prendra une enveloppe de randomisation (voir le SOP Schisto/SOP/GEN/03) et notera le numéro de randomisation dans l'eCRF. Il notera le numéro de randomisation et le groupe de traitement assigné aussi dans le « Journal de dépistage et de recrutement ».
- A la fin des deux journées d'évaluations cliniques, la liste finale d'identification des participants recrutés sera établie par le PI et la liste sera communiquée à toute l'équipe de l'étude.

NB : Dans les jours qui suivent la randomisation tous les enfants inclus bénéficieront de l'examen échographique abdominal initial par des radiologues expérimentés selon un programme établi à part. L'examen échographique sera effectué conformément aux directives de l'OMS et les observations seront notées dans le « SchistoFORM\_Echographie ».

Les résultats seront ensuite transcrits dans le eCRF « Echographie » par la personne responsable de la saisie des données.



## Schisto/SOP/CLIN/01

### 4.2. Visite(s) d'administration du traitement initial

#### 4.2.1. Jour 0 (bras AM et bras PZQ)

Un **infirmier** appellera un par un tous les participants qui ont été randomisés pour prendre le PZQ.

L'autre **infirmier** appellera les participants qui recevront l'AM.

Deux listes seront établies à ce fin préalablement. Sur ces listes ils indiqueront la présence ou absence de l'enfant.

Sur la base du numéro d'identification, le fichier correspondant au participant sera sélectionné sur la tablette informatique. Avant de distribuer le médicament, **l'infirmier** interrogera l'enfant en se basant sur les questions dans les eCRF de la visite « Jour 0 », à savoir sur les médicaments éventuellement pris (eCRF « **Suivi médicaments** ») et les symptômes éventuellement survenus depuis la visite de recrutement (eCRF « **Suivi symptômes** »).

##### 4.2.1.1. Suivi Médicaments

- **L'infirmier** vérifie si l'enfant a pris un médicament antipaludéen ou le PZQ.
- Il vérifie aussi s'il a pris des autres médicaments.
- Pour *chaque* nouveau traitement pris (aussi pour le PZQ et les ACT), le eCRF « **Médicaments** » doit être rempli et **le médecin** s'assure qu'il n'y a pas d'interaction avec le traitement AM (voir liste ci-dessous). S'il y a interaction, il doit décider de retarder le don de AM ou bien d'exclure l'enfant selon le médicament pris et son indication.

| Liste de médication concomitante non autorisée |                               |                                                 |
|------------------------------------------------|-------------------------------|-------------------------------------------------|
| Catégorie                                      | Nom de la substance           | Dénomination commerciale et dosages disponibles |
| Médicaments cardiaques                         | Amiodarone                    | Cordarone 200                                   |
|                                                | Sotalol                       | Sotalex 80                                      |
| Anticonvulsivants                              | Carbamazépine                 | Tegretol 200, LP 200, LP 400                    |
|                                                | Phénobarbital                 | <b>Gardenal 50, 100 - Phénobarbital</b>         |
|                                                | Phénytoïne                    | Di Hydan 100                                    |
| Antipaludéens                                  | Acide valproïque              | Depakine 200, 500, 500 Chrono                   |
|                                                | Quinine                       | QRSINA 250                                      |
|                                                | Artemether/lumefantrine       | Cortem 80/480                                   |
|                                                | Artesunate/amodiaquine        | Camoquin                                        |
| Antibiotiques                                  | Dihydroartémisine/piperaquine | Malacur cp                                      |
|                                                | Ampicilline                   | <b>Ampicilline inj/gel</b>                      |
|                                                | Tétracycline                  | Large gamme                                     |
|                                                | Rifampicine                   | Rifamycine collyre                              |
|                                                | Quinolones                    | Cifran cp                                       |
|                                                | Kétoconazole                  | (Ketoderm cr)                                   |
| Metronidazole                                  | Metronidazole                 |                                                 |

## Schisto/SOP/CLIN/01

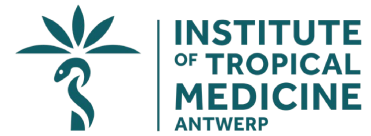

|                              |                                                |                                        |
|------------------------------|------------------------------------------------|----------------------------------------|
| Psychotropes                 |                                                |                                        |
| Antidépresseurs tricycliques | Amitriptyline<br>Imipramine<br>Levomepromazine | Laroxyl 25<br>Anafranil<br>Nozinan 100 |
| Antipsychotiques             | Halopéridol                                    | Haldol goutte                          |
| Prokinétiques                | Métoclopramide.                                | Primperan                              |

Attention : les médicaments en "épaisse" sont disponible dans le district sanitaire de Richard Toll

## 4.2.1.2. Suivi symptômes

- **L'infirmier** prendra la température avec un thermomètre tympanique. Afin d'obtenir une bonne lecture, il suivra les instructions suivantes :
  - Retirez le thermomètre du socle. Appuyez sur le bouton Marche/arrêt. Pendant un autocontrôle interne, tous les voyants s'affichent à l'écran. La dernière température prise s'affiche ensuite pendant 5 secondes.
  - L'indicateur d'embout jetable clignote pour signaler qu'un embout jetable est nécessaire. Fixez un embout jetable en poussant la sonde du thermomètre directement dans l'embout jetable à l'intérieur de la boîte, puis en la ressortant.  
*Remarque* : Le thermomètre ThermoScan Braun ne fonctionne pas tant qu'il ne comporte pas d'embout jetable.
  - Pour obtenir des mesures précises, assurez-vous que l'embout jetable est propre, avant chaque relevé de température. Sinon, nettoyez-le. En cas de besoin appuyez sur le bouton Eject pour retirer et jeter l'embout jetable utilisé et installez-en un nouveau et propre.
  - Sélectionnez l'âge à l'aide du bouton Age Precision™. Appuyez sur le bouton pour passer d'un groupe d'âge à l'autre. ThermoScan affiche par défaut la dernière tranche d'âge utilisée si vous ne la modifiez pas

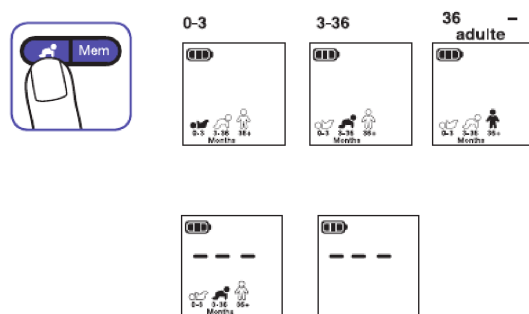

- Ajustez bien la sonde dans le conduit auditif, puis poussez et relâchez le bouton Start. Le voyant lumineux ExacTemp clignote pendant la prise de température. Si la sonde a été correctement introduite dans le conduit auditif pendant la mesure, un long bip signale la fin de la mesure. Le résultat s'affiche à l'écran

## Schisto/SOP/CLIN/01

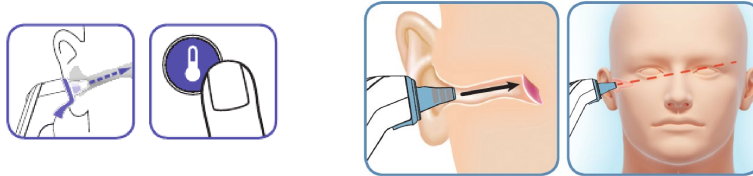

*Si une fièvre (> 38°C) est observée, **le médecin** doit évaluer l'enfant. Ce dernier le réfèrera au poste de santé avec des instructions écrites*

- **L'infirmier** parcourt la liste des symptômes potentiels avec l'enfant. Pour chaque **symptôme** rapporté, **l'infirmier** indiquera l'intensité – « Léger », « Modéré » ou « Sévère » – en fonction du ressenti du participant, si un contact avec le personnel médical (autre que celui de l'étude) a été fait et si le symptôme est encore présent au jour de la visite.
  - L'intensité est définie en générale comme suit :
    - **Léger** : le symptôme n'interfère pas avec les activités quotidiennes du participant.
    - **Modéré** : le symptôme se traduit par un faible niveau de désagrément.. Il peut causer une certaine interférence avec les activités quotidiennes.
    - **Sévère** : le symptôme interrompt/perturbe l'activité quotidienne habituelle du participant. Un symptôme sévère est habituellement incapacitant.
  - Pour certains symptômes indiqués dans l'eCRF, la gradation spécifique suivante peut être utilisée :
    - Sang dans les selles
      - Léger** : Traces de sang non mélangé avec les selles
      - Modéré** : Sang mélangé avec les selles.
      - Sévère** : Diarrhée sanguinolente ou de couleur rouge ou noire.
    - Hématurie
      - Léger** : Urine de couleur rose à rouge clair.
      - Modéré** : Urine rouge foncé ou présence de petits caillots de sang.
      - Sévère** : Gros caillots de sang, difficulté et douleurs pour uriner.
    - Eruption cutanée
      - Léger** : Rougeur ou démangeaisons de la peau sur une partie ou la totalité du corps
      - Modéré** : Eruption papulo-nodulaire ou desquamation légère ou petites plaies.
      - Sévère** : Ampoules/phlyctènes, ulcères ouverts, desquamation humide, éruption cutanée grave sur de grandes surfaces.
- Il est important que ces définitions soient incluses dans l'enquête, de façon assez détaillé.*
- En cas de symptômes légers en cours, **l'infirmier** peut traiter les symptômes en utilisant la pharmacie à disposition.*
- En cas de symptômes d'intensité modérée ou sévère en cours, **le médecin** doit évaluer l'enfant.*
- S'il n'y a aucun problème significatif, **l'infirmier** indiquera à la fin de l'eCRF « **Suivi symptômes** » que le participant est apte à recevoir le médicament à l'étude.

## Schisto/SOP/CLIN/01



## 4.2.1.3. Traitement étude

- **L'infirmier** peut ensuite donner l'un des deux traitements (selon le groupe/bras auquel l'enfant est assigné).
- Il indique le traitement à donner : Praziquantel ou Artésunate-Méfloquine
- Il pèsera l'enfant à l'aide de la balance (l'enfant doit enlever ses chaussures) et note le poids dans l'eCRF « **Traitement étude** ». La dose recommandée apparaîtra, calculé selon les dosages suivants :

| Dosage de l'Artésunate-Méfloquine |                                |                                  |
|-----------------------------------|--------------------------------|----------------------------------|
| Poids du participant (kg)         | Nombre de comprimés            |                                  |
|                                   | Artésunate-Méfloquine 25/50 mg | Artésunate-Méfloquine 100/200 mg |
| 15 – 21                           | 3                              | 0                                |
| 22 – 27                           | 0                              | 1                                |
| 28 – 33                           | 1                              | 1                                |
| 34 – 39                           | 2                              | 1                                |
| 40 – 46                           | 3                              | 1                                |
| ≥ 47                              | 0                              | 2                                |

| Dosage du Praziquantel    |                                          |
|---------------------------|------------------------------------------|
| Poids du participant (kg) | Nombre de comprimés Praziquantel (600mg) |
| 12 - 18                   | 1                                        |
| 19 - 26                   | 1 ½                                      |
| 27 - 33                   | 2                                        |
| 34 - 41                   | 2 ½                                      |
| ≥ 42                      | 3                                        |

- **L'infirmier** enregistrera ensuite la prise de médicament (date de prise, nombre de comprimés effectivement donnés, le numéro de lot et date d'expiration) dans l'eCRF « **Traitement étude** ».
- **Les infirmiers** surveilleront les enfants pendant deux heures après la prise des médicaments.
  - Si l'enfant vomit il s'agit d'un événement indésirable (EI). Voir le « SchistoSOPCLIN02- PRISE\_EN\_CHARGE\_RAPPORT\_EI » pour prise en charge.
    - dans les 30 premières minutes, il sera réévalué par le **médecin**, et devra reprendre la dose complète (quel que soit le bras d'étude). Cet événement sera noté dans l'eCRF.
    - Si l'enfant vomit entre 30 min et 2 heures après la prise du médicament, la moitié de la dose sera de nouveau administrée.
  - En cas de vomissements répétés (à la deuxième prise), l'enfant sera exclu de l'intervention et la raison sera notée dans l'eCRF « **Fin étude** » :

**Schisto/SOP/CLIN/01**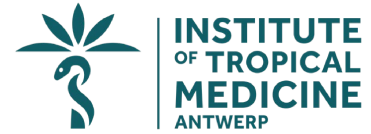

- *Suivi des EI jusqu'à 1 mois après l'administration l'administration du médicament à l'étude*
- *Continuer les activités d'étude, saufs les traitements d'étude. Symptômes ne seront plus enregistré comme EI après un mois après le traitement.*

*Donner PZQ à la semaine 48*



## Schisto/SOP/CLIN/01

### 4.2.2. Jours 1 et 2 (bras AM seulement)

Dans le bras AM, le **médecin** et l'**infirmier** reverront les enfants sur le site d'étude pour la seconde (J1) et la troisième (J2) administration d'AM.

- L'**infirmier** appellera un par un tous les participants qui ont été randomisés pour prendre l'AM. Une liste sera établie à ce fin préalablement. Sur ce liste il indiquera la présence ou absence de l'enfant.
- Sur la base du numéro d'identification, le fichier correspondant au participant sera sélectionné sur la tablette informatique.
- Avant de distribuer le médicament, l'**infirmier** interrogera l'enfant en se basant sur les questions dans les eCRF de la visite « Jour 1 » ou « Jour 2 », à savoir sur les médicaments éventuellement pris (eCRF « **Suivi médicaments**») et les symptômes éventuellement survenus (eCRF « **Suivi symptômes** ») depuis la dernière visite.
- L'intervalle maximum pour compléter les trois administrations de AM est 5 jours. Une dose qui n'a pas été administrée dans cet intervalle ne devrait plus être administrée. L'enfant reste inclus dans l'étude.

#### 4.2.2.1. Suivi Médicaments

- L'**infirmier** vérifie si l'enfant a pris un médicament antipaludéen ou le PZQ.
- Il vérifie aussi s'il a pris des autres médicaments.
- Pour *chaque* nouveau traitement pris (aussi pour le PZQ et les ACT), le eCRF « **Médicaments** » doit être rempli et le **médecin** s'assure qu'il n'y a pas d'interaction avec le traitement AM (voir liste ci-dessous). S'il y a interaction, il doit décider de retarder le don de AM ou bien d'exclure l'enfant selon le médicament pris et son indication.

| Liste de médication concomitante non autorisée |                               |                                                 |
|------------------------------------------------|-------------------------------|-------------------------------------------------|
| Catégorie                                      | Nom de la substance           | Dénomination commerciale et dosages disponibles |
| Médicaments cardiaques                         | Amiodarone                    | Cordarone 200                                   |
|                                                | Sotalol                       | Sotalex 80                                      |
| Anticonvulsivants                              | Carbamazépine                 | Tegretol 200, LP 200, LP 400                    |
|                                                | Phénobarbital                 | <b>Gardenal 50, 100 - Phénobarbital</b>         |
|                                                | Phénytoïne                    | Di Hydan 100                                    |
| Antipaludéens                                  | Acide valproïque              | Depakine 200, 500, 500 Chrono                   |
|                                                | Quinine                       | QURSINA 250                                     |
|                                                | Artemether/lumefantrine       | Cortem 80/480                                   |
|                                                | Artesunate/amodiaquine        | Camoquin                                        |
| Antibiotiques                                  | Dihydroartémisine/piperaquine | Malacur cp                                      |
|                                                | Ampicilline                   | <b>Ampicilline inj/gel</b>                      |
|                                                | Tétracycline                  | Large gamme                                     |
|                                                | Rifampicine                   | Rifamycine collyre                              |
|                                                | Quinolones                    | Cifran cp                                       |
|                                                | metronidazole                 | metronidazole                                   |



## Schisto/SOP/CLIN/01



|                                     | Kétoconazole                                   | (Ketoderm cr)                          |
|-------------------------------------|------------------------------------------------|----------------------------------------|
| <b>Psychotropes</b>                 |                                                |                                        |
| <b>Antidépresseurs tricycliques</b> | Amitriptyline<br>Imipramine<br>Levomepromazine | Laroxyl 25<br>Anafranil<br>Nozinan 100 |
| <b>Antipsychotiques</b>             | Halopéridol                                    | Haldol goutte                          |
| <b>Prokinétiques</b>                | Métoclopramide.                                | Primperan                              |

Attention : les médicaments en "épaisse" sont disponible dans le district sanitaire de Richard Toll

## 4.2.2.2. Suivi symptômes

- **L'infirmier** prendra la température avec un thermomètre tympanique. Afin d'obtenir une bonne lecture, il suivra les instructions suivantes :
  - Retirez le thermomètre du socle. Appuyez sur le bouton Marche/arrêt. Pendant un autocontrôle interne, tous les voyants s'affichent à l'écran. La dernière température prise s'affiche ensuite pendant 5 secondes.
  - L'indicateur d'embout jetable clignote pour signaler qu'un embout jetable est nécessaire. Fixez un embout jetable en poussant la sonde du thermomètre directement dans l'embout jetable à l'intérieur de la boîte, puis en la ressortant.  
*Remarque* : Le thermomètre ThermoScan Braun ne fonctionne pas tant qu'il ne comporte pas d'embout jetable.
  - Pour obtenir des mesures précises, assurez-vous que l'embout jetable est propre, avant chaque relevé de température. Sinon, nettoyez-le. En cas de besoin appuyez sur le bouton Eject pour retirer et jeter l'embout jetable utilisé et installez-en un nouveau et propre.
  - Sélectionnez l'âge à l'aide du bouton Age Precision™. Appuyez sur le bouton pour passer d'un groupe d'âge à l'autre. ThermoScan affiche par défaut la dernière tranche d'âge utilisée si vous ne la modifiez pas

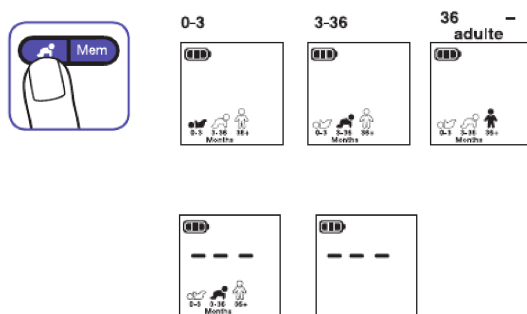

- Ajustez bien la sonde dans le conduit auditif, puis poussez et relâchez le bouton Start. Le voyant lumineux ExacTemp clignote pendant la prise de température. Si la sonde a été correctement introduite dans le conduit auditif pendant la mesure, un long bip signale la fin de la mesure. Le résultat s'affiche à l'écran

## Schisto/SOP/CLIN/01



*Si une fièvre (> 38°C) est observée, il s'agit d'un événement indésirable.  
Voir le « SchistoSOPCLIN02-PRISE EN CHARGE RAPPORT EI » pour prise en charge.*

- **L'infirmier** parcourt la liste des symptômes potentiels avec l'enfant. Pour chaque **symptôme** rapporté, l'**infirmier** indiquera l'intensité– « Léger », « Modéré » ou « Sévère » – en fonction du ressenti du participant, si un contact avec le personnel médical (autre que celui de l'étude) a été fait et si le symptôme est encore présent au jour de la visite.
- L'intensité est en générale définis comme suit :
  - Léger : le symptôme n'interfère pas avec les activités quotidiennes du participant.
  - Modéré : le symptôme se traduit par un faible niveau de désagrément. Il peut causer une certaine interférence avec les activités quotidiennes.
  - Sévère : le symptôme interrompt/perturbe l'activité quotidienne habituelle du participant. Un symptôme sévère est habituellement incapacitant.
- Pour certains symptômes indiqués dans l'eCRF, la gradation spécifique suivante peut être utilisée :
  - Sang dans les selles
    - Léger : Traces de sang non mélangé avec les selles
    - Modéré : Sang mélangé avec les selles.
    - Sévère : Diarrhée sanguinolente ou de couleur rouge ou noire.
  - Hématurie
    - Léger : Urine de couleur rose à rouge clair.
    - Modéré : Urine rouge foncé ou présence de petits caillots de sang.
    - Sévère : Gros caillots de sang, difficulté et douleurs pour uriner.
  - Eruption cutanée
    - Léger : Rougeur ou démangeaisons de la peau sur une partie ou la totalité du corps
    - Modéré : Eruption papulo-nodulaire ou desquamation légère ou petites plaies.
    - Sévère : Ampoules/phlyctènes, ulcères ouverts, desquamation humide, éruption cutanée grave sur de grandes surfaces.

*En cas de symptômes légères en cours, l'infirmier peut traiter les symptômes en utilisant la pharmacie à disposition.*

*En cas de symptômes d'intensité modérée ou sévère, il s'agit d'un événement indésirable. Voir le « SchistoSOPCLIN02-PRISE EN CHARGE RAPPORT EI » pour prise en charge.*

- S'il n'y a aucun problème significatif, l'**infirmier** indiquera à la fin de l'eCRF « **Suivi symptômes** » que le participant est apte à recevoir le médicament à l'étude.

## Schisto/SOP/CLIN/01



## 4.2.2.3. Traitement étude

- **L'infirmier** peut ensuite donner l'AM.
- Il pèsera l'enfant à l'aide de la balance (l'enfant doit enlever ses chaussures) et note le poids dans l'eCRF « **Traitement étude** ».

*Si le poids est significativement différent de celui de la mesure précédente, un avertissement apparaîtra.*

*L'équipe chargée de l'étude doit alors repeser le patient. Si l'avertissement apparaît toujours après la deuxième pesée, l'identité des patients doit être vérifiée à nouveau et confirmée (la CIF doit être présentée).*

*Si l'identité du patient est confirmée, le médecin doit vérifier s'il existe une autre raison à cette différence.*

- La dose recommandée apparaîtra, calculé selon les dosages suivants :

| Dosage de l'Artésunate-Méfloquine |                                   |                                     |
|-----------------------------------|-----------------------------------|-------------------------------------|
| Poids du participant (kg)         | Nombre de comprimés               |                                     |
|                                   | Artésunate-Méfloquine<br>25/50 mg | Artésunate-Méfloquine<br>100/200 mg |
| 15 – 21                           | 3                                 | 0                                   |
| 22 – 27                           | 0                                 | 1                                   |
| 28 – 33                           | 1                                 | 1                                   |
| 34 – 39                           | 2                                 | 1                                   |
| 40 – 46                           | 3                                 | 1                                   |
| ≥ 47                              | 0                                 | 2                                   |

- L'administration d'AM peut être retardée, à condition que les trois doses soit données dans une période de 5 jours maximum. Toute dose qui ne peut (plus) être administrée dans ce délai sera annulée. Le participant restera dans l'étude.
- **Les infirmiers** surveilleront les enfants pendant deux heures après la prise des médicaments.
  - *Si l'enfant vomit il s'agit d'un événement indésirable (EI). Voir le « SchistoSOPCLIN02- PRISE\_EN\_CHARGE\_RAPPORT\_EI » pour prise en charge.*
    - *dans les 30 premières minutes, il sera réévalué par le **médecin**, et devra reprendre la dose complète. Cet événement sera noté dans l'eCRF.*
    - *Si l'enfant vomit entre 30 min et 2 heures après la prise du médicament, la moitié de la dose sera de nouveau administrée.*
  - *En cas de vomissements répétés (à la deuxième prise), l'enfant sera exclu de l'intervention et la raison sera notée dans l'eCRF « **Fin étude** » :*
    - *Suivi des EI jusqu'à 1 mois après l'administration du médicament à l'étude*
    - *Continuer les activités d'étude, saufs les traitements d'étude. Symptômes ne seront plus enregistré comme EI après un mois après le traitement.*
    - *Donner PZQ à la semaine 48*

**Schisto/SOP/CLIN/01**

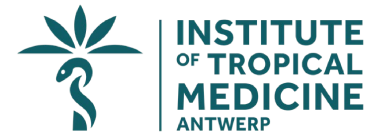

## Schisto/SOP/CLIN/01



## 4.3. Visite de suivi traitement initial - Jour 7 (bras AM et PZQ)

- **Les infirmiers** visiteront à domicile tous les enfants (des deux bras d'étude) sept jours après l'administration du traitement initial.
- **Les infirmiers** prendront la température et interrogeront les enfants en utilisant la liste systématique des questions apparaissant dans l'eCRF « **Suivi médicaments** », l'eCRF « **Suivi symptômes** », et l'eCRF « **Détection de paludisme** ».
- En cas de visite manquée, après 3 jours aucune autre tentative ne doit être faite.

## 4.3.1. Suivi Médicaments

- **L'infirmier** vérifie si l'enfant a pris un médicament antipaludéen ou le PZQ.
- Il vérifie aussi s'il a pris des autres médicaments.
- Pour *chaque* nouveau traitement pris (aussi pour le PZQ et les ACT), le eCRF « **Médicaments** » doit être rempli.

## 4.3.2. Suivi symptômes

- **L'infirmier** prendra la température avec un thermomètre tympanique. Afin d'obtenir une bonne lecture, il suivra les instructions suivantes :
  - Retirez le thermomètre du socle. Appuyez sur le bouton Marche/arrêt. Pendant un autocontrôle interne, tous les voyants s'affichent à l'écran. La dernière température prise s'affiche ensuite pendant 5 secondes.
  - L'indicateur d'embout jetable clignote pour signaler qu'un embout jetable est nécessaire. Fixez un embout jetable en poussant la sonde du thermomètre directement dans l'embout jetable à l'intérieur de la boîte, puis en la ressortant.  
*Remarque* : Le thermomètre ThermoScan Braun ne fonctionne pas tant qu'il ne comporte pas d'embout jetable.
  - Pour obtenir des mesures précises, assurez-vous que l'embout jetable est propre, avant chaque relevé de température. Sinon, nettoyez-le. En cas de besoin appuyez sur le bouton Eject pour retirer et jeter l'embout jetable utilisé et installez-en un nouveau et propre.
  - Sélectionnez l'âge à l'aide du bouton Age Precision™. Appuyez sur le bouton pour passer d'un groupe d'âge à l'autre. ThermoScan affiche par défaut la dernière tranche d'âge utilisée si vous ne la modifiez pas

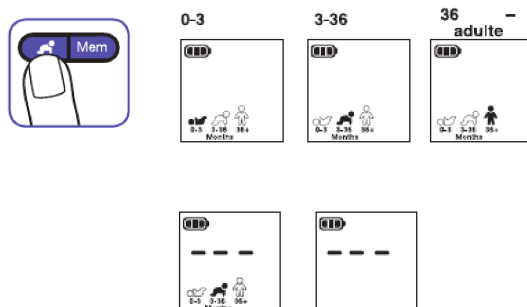

## Schisto/SOP/CLIN/01

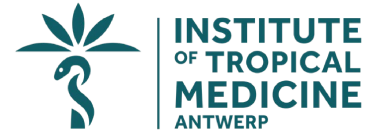

- Ajustez bien la sonde dans le conduit auditif, puis poussez et relâchez le bouton Start. Le voyant lumineux ExacTemp clignote pendant la prise de température. Si la sonde a été correctement introduite dans le conduit auditif pendant la mesure, un long bip signale la fin de la mesure. Le résultat s'affiche à l'écran

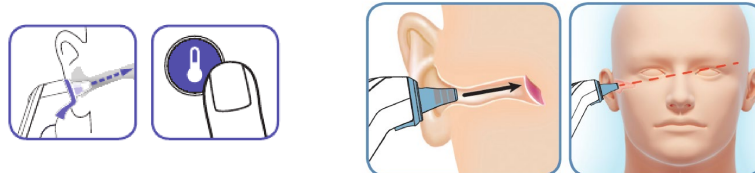

Si une fièvre (> 38°C) est observée, il s'agit d'un événement indésirable.  
Voir le « SchistoSOPCLIN02-PRISE EN CHARGE RAPPORT EI » pour prise en charge.

- **L'infirmier** parcourt la liste des symptômes potentiels avec l'enfant. L'objectif est d'énumérer **tous** les symptômes et, le cas échéant, de cocher la case appropriée. Pour chaque **symptôme** rapporté, **l'infirmier** indiquera l'intensité – « Léger », « Modéré » ou « Sévère » – en fonction du ressenti du participant, si un contact avec le personnel médical (autre que celui de l'étude) a été fait et si le symptôme est encore présent au jour de la visite.
- L'intensité est en générale définis comme suit :
  - Léger : le symptôme n'interfère pas avec les activités quotidiennes du participant.
  - Modéré : le symptôme se traduit par un faible niveau de désagrément. Il peut causer une certaine interférence avec les activités quotidiennes.
  - Sévère : le symptôme interrompt/perturbe l'activité quotidienne habituelle du participant. Un symptôme sévère est habituellement incapacitant.
- Pour certains symptômes indiqués dans l'eCRF, la gradation spécifique suivante peut être utilisée :
  - Sang dans les selles
    - Léger : Traces de sang non mélangé avec les selles
    - Modéré : Sang mélangé avec les selles.
    - Sévère : Diarrhée sanguinolente ou de couleur rouge ou noire.
  - Hématurie
    - Léger : Urine de couleur rose à rouge clair.
    - Modéré : Urine rouge foncé ou présence de petits caillots de sang.
    - Sévère : Gros caillots de sang, difficulté et douleurs pour uriner.
  - Eruption cutanée
    - Léger : Rougeur ou démangeaisons de la peau sur une partie ou la totalité du corps
    - Modéré : Eruption papulo-nodulaire ou desquamation légère ou petites plaies.
    - Sévère : Ampoules/phlyctènes, ulcères ouverts, desquamation humide, éruption cutanée grave sur de grandes surfaces.

En cas de symptômes légers en cours, **l'infirmier** peut traiter les symptômes en utilisant la pharmacie à disposition (après avis médical par téléphone si nécessaire).

**Schisto/SOP/CLIN/01**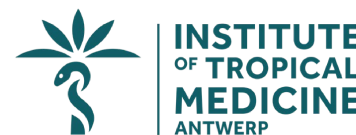

*En cas de symptômes d'intensité modérée ou sévère, il s'agit d'un événement indésirable.  
L'infirmier indique sur le « Journal d'activités » les observations éventuels et qu'il y a un EI à rapporter. Voir le « SchistoSOPCLIN02-PRISE EN CHARGE RAPPORT EI » pour prise en charge.*

## 4.3.3. Détection paludisme

- L'infirmier demande l'enfant spécifiquement si un diagnostic de paludisme a été fait depuis la dernière visite.

*L'infirmier vérifie la date et le lieu du diagnostic. Il s'agit de paludisme clinique. Voir le « SchistoSOPCLIN02-PRISE EN CHARGE RAPPORT EI » pour prise en charge.*

## Schisto/SOP/CLIN/01



## 4.4. Visite d'évaluation de l'efficacité parasitologique du traitement initial (semaine 4)

Cette visite est destinée à la collecte des urines et des selles pour l'évaluation de l'efficacité parasitologique des traitements. (Voir SchistoSOPLAB01)

Durant cette visite, la tolérance aux traitements à l'étude sera également évaluée en remplissant l'eCRF « **Suivi médicaments** », l'eCRF « **Suivi symptômes** » et l'eCRF « **Détection de paludisme** ».

## 4.4.1. Suivi Médicaments

- **L'infirmier** vérifie si l'enfant a pris un médicament antipaludéen ou le PZQ.
- Il vérifie aussi s'il a pris des autres médicaments.
- Pour chaque nouveau traitement pris (aussi pour le PZQ et les ACT), le eCRF « **Médicaments** » doit être rempli.

## 4.3.2. Suivi symptômes

- **L'infirmier** prendra la température avec un thermomètre tympanique. Afin d'obtenir une bonne lecture, il suivra les instructions suivantes :
  - Retirez le thermomètre du socle. Appuyez sur le bouton Marche/arrêt. Pendant un autocontrôle interne, tous les voyants s'affichent à l'écran. La dernière température prise s'affiche ensuite pendant 5 secondes.
  - L'indicateur d'embout jetable clignote pour signaler qu'un embout jetable est nécessaire. Fixez un embout jetable en poussant la sonde du thermomètre directement dans l'embout jetable à l'intérieur de la boîte, puis en la ressortant.  
*Remarque* : Le thermomètre ThermoScan Braun ne fonctionne pas tant qu'il ne comporte pas d'embout jetable.
  - Pour obtenir des mesures précises, assurez-vous que l'embout jetable est propre, avant chaque relevé de température. Sinon, nettoyez-le. En cas de besoin appuyez sur le bouton Eject pour retirer et jeter l'embout jetable utilisé et installez-en un nouveau et propre.
  - Sélectionnez l'âge à l'aide du bouton Age Precision™. Appuyez sur le bouton pour passer d'un groupe d'âge à l'autre. ThermoScan affiche par défaut la dernière tranche d'âge utilisée si vous ne la modifiez pas

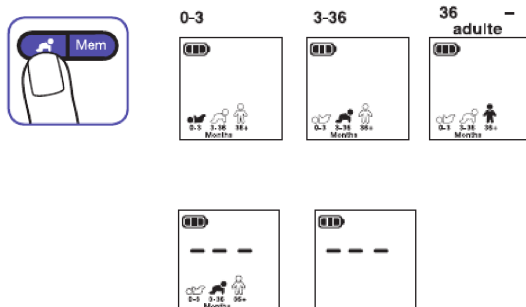



## Schisto/SOP/CLIN/01



- Ajustez bien la sonde dans le conduit auditif, puis poussez et relâchez le bouton Start. Le voyant lumineux ExacTemp clignote pendant la prise de température. Si la sonde a été correctement introduite dans le conduit auditif pendant la mesure, un long bip signale la fin de la mesure. Le résultat s'affiche à l'écran

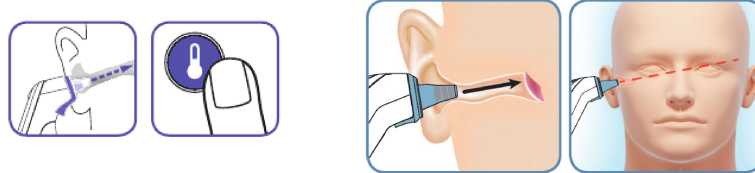

Si une fièvre (> 38°C) est observée, il s'agit d'un événement indésirable.

Voir le « SchistoSOPCLIN02-PRISE EN CHARGE RAPPORT EI » pour prise en charge.

- **L'infirmier** parcourt la liste des symptômes potentiels avec l'enfant. Pour chaque **symptôme** rapporté, **l'infirmier** indiquera l'intensité– « Léger », « Modéré » ou « Sévère » – en fonction du ressenti du participant, si un contact avec le personnel médical (autre que celui de l'étude) a été fait et si le symptôme est encore présent au jour de la visite.
- L'intensité est en générale définis comme suit :
  - Léger : le symptôme n'interfère pas avec les activités quotidiennes du participant.
  - Modéré : le symptôme se traduit par un faible niveau de désagrément. Il peut causer une certaine interférence avec les activités quotidiennes.
  - Sévère : le symptôme interrompt/perturbe l'activité quotidienne habituelle du participant. Un symptôme sévère est habituellement incapacitant.
- Pour certains symptômes indiqués dans l'eCRF, la gradation spécifique suivante peut être utilisée :
  - Sang dans les selles
    - Léger : Traces de sang non mélangé avec les selles
    - Modéré : Sang mélangé avec les selles.
    - Sévère : Diarrhée sanguinolente ou de couleur rouge ou noire.
  - Hématurie
    - Léger : Urine de couleur rose à rouge clair.
    - Modéré : Urine rouge foncé ou présence de petits caillots de sang.
    - Sévère : Gros caillots de sang, difficulté et douleurs pour uriner.
  - Eruption cutanée
    - Léger : Rougeur ou démangeaisons de la peau sur une partie ou la totalité du corps
    - Modéré : Eruption papulo-nodulaire ou desquamation légère ou petites plaies.
    - Sévère : Ampoules/phlyctènes, ulcères ouverts, desquamation humide, éruption cutanée grave sur de grandes surfaces.

En cas de symptômes légers en cours, l'infirmier peut traiter les symptômes en utilisant la pharmacie à disposition (après avis médical par téléphone si nécessaire).

En cas de symptômes d'intensité modérée ou sévère, il s'agit d'un événement indésirable.

L'infirmier indique sur le « Journal d'activités » les observations éventuels et qu'il y a un EI à rapporter. Voir le « SchistoSOPCLIN02-PRISE EN CHARGE RAPPORT EI » pour prise en charge.

**Schisto/SOP/CLIN/01**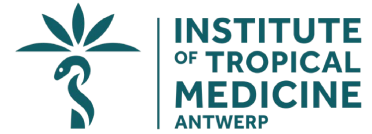

## 4.3.3. Détection paludisme

- **L'infirmier** demande l'enfant spécifiquement si un diagnostic de paludisme a été fait depuis la dernière visite.

*Si oui, l'infirmier vérifie la date et le lieu du diagnostic. Il s'agit de paludisme clinique. Voir le « SchistoSOPCLIN02-PRISE EN CHARGE RAPPORT EI » pour prise en charge.*

## Schisto/SOP/CLIN/01



## 4.5. Visite d'administration du deuxième traitement

## 4.5.1. Jour 0 (bras AM seulement)

- AA la première visite d'administration du deuxième traitement (jour 0), **l'infirmier** appellera un par un tous les participants qui ont été randomisés pour prendre l'AM. Une liste sera établie à ce fin préalablement. Sur ce liste il indiquera la présence ou absence de l'enfant.
- Sur la base du numéro d'identification, le fichier correspondant au participant sera sélectionné sur la tablette informatique.
- Avant de distribuer le médicament, **l'infirmier** interrogera l'enfant en se basant sur les questions dans les eCRF de la visite « S6 J0 », à savoir sur les médicaments éventuellement pris (eCRF « **Suivi médicaments**») et les symptômes éventuellement survenus (eCRF « **Suivi symptômes** ») depuis la dernière visite.

## 4.5.1.1. Suivi Médicaments

- **L'infirmier** vérifie si l'enfant a pris un médicament antipaludéen ou le PZQ.
- Il vérifie aussi s'il a pris des autres médicaments.
- Pour *chaque* nouveau traitement pris (aussi pour le PZQ et les ACT), le eCRF « **Médicaments** » doit être rempli et **le médecin** s'assure qu'il n'y a pas d'interaction avec le traitement AM (voir liste ci-dessous). S'il y a interaction, il doit décider de retarder le don de AM ou bien d'exclure l'enfant selon le médicament pris et son indication.

| Liste de médication concomitante non autorisée |                               |                                                 |
|------------------------------------------------|-------------------------------|-------------------------------------------------|
| Catégorie                                      | Nom de la substance           | Dénomination commerciale et dosages disponibles |
| Médicaments cardiaques                         | Amiodarone                    | Cordarone 200                                   |
|                                                | Sotalol                       | Sotalex 80                                      |
| Anticonvulsivants                              | Carbamazépine                 | Tegretol 200, LP 200, LP 400                    |
|                                                | Phénobarbital                 | <b>Gardenal 50, 100 - Phénobarbital</b>         |
|                                                | Phénytoïne                    | Di Hydan 100                                    |
|                                                | Acide valproïque              | Depakine 200, 500, 500 Chrono                   |
| Antipaludéens                                  | Quinine                       | QURSINA 250                                     |
|                                                | Artemether/lumefantrine       | Cortem 80/480                                   |
|                                                | Artesunate/amodiaquine        | Camoquin                                        |
|                                                | Dihydroartémisine/piperaquine | Malacur cp                                      |
| Antibiotiques                                  | Ampicilline                   | <b>Ampicilline inj/gel</b>                      |
|                                                | Tétracycline                  | Large gamme                                     |
|                                                | Rifampicine                   | Rifamycine collyre                              |
|                                                | Quinolones                    | Cifran cp                                       |
|                                                | metronidazole                 | metronidazole                                   |
|                                                | Kétoconazole                  | (Ketoderm cr)                                   |

## Schisto/SOP/CLIN/01

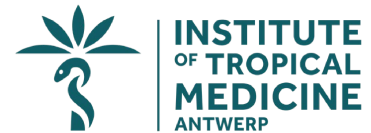

|                                     |                                                |                                        |
|-------------------------------------|------------------------------------------------|----------------------------------------|
| <b>Psychotropes</b>                 |                                                |                                        |
| <b>Antidépresseurs tricycliques</b> | Amitriptyline<br>Imipramine<br>Levomepromazine | Laroxyl 25<br>Anafranil<br>Nozinan 100 |
| <b>Antipsychotiques</b>             | Halopéridol                                    | Haldol goutte                          |
| <b>Prokinétiques</b>                | Métoclopramide.                                | Primperan                              |

Attention : les médicaments en "épaisse" sont disponible dans le district sanitaire de Richard Toll

## 4.5.1.2. Suivi symptômes

- **L'infirmier** prendra la température avec un thermomètre tympanique. Afin d'obtenir une bonne lecture, il suivra les instructions suivantes :
  - Retirez le thermomètre du socle. Appuyez sur le bouton Marche/arrêt. Pendant un autocontrôle interne, tous les voyants s'affichent à l'écran. La dernière température prise s'affiche ensuite pendant 5 secondes.
  - L'indicateur d'embout jetable clignote pour signaler qu'un embout jetable est nécessaire. Fixez un embout jetable en poussant la sonde du thermomètre directement dans l'embout jetable à l'intérieur de la boîte, puis en la ressortant.  
*Remarque* : Le thermomètre ThermoScan Braun ne fonctionne pas tant qu'il ne comporte pas d'embout jetable.
  - Pour obtenir des mesures précises, assurez-vous que l'embout jetable est propre, avant chaque relevé de température. Sinon, nettoyez-le. En cas de besoin appuyez sur le bouton Eject pour retirer et jeter l'embout jetable utilisé et installez-en un nouveau et propre.
  - Sélectionnez l'âge à l'aide du bouton Age Precision™. Appuyez sur le bouton pour passer d'un groupe d'âge à l'autre. ThermoScan affiche par défaut la dernière tranche d'âge utilisée si vous ne la modifiez pas

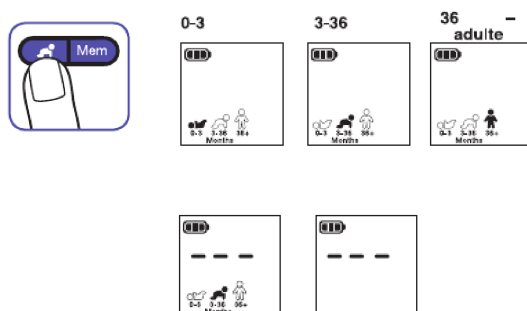

- Ajustez bien la sonde dans le conduit auditif, puis poussez et relâchez le bouton Start. Le voyant lumineux ExacTemp clignote pendant la prise de température. Si la sonde a été correctement introduite dans le conduit auditif pendant la mesure, un long bip signale la fin de la mesure. Le résultat s'affiche à l'écran

## Schisto/SOP/CLIN/01

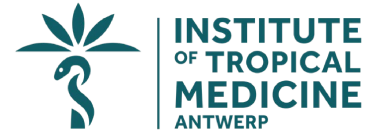

*Si une fièvre (> 38°C) est observée, le médecin doit évaluer l'enfant. Ce dernier le réfèrera au poste de santé avec des instructions écrites.*

- **L'infirmier** parcourt la liste des symptômes potentiels avec l'enfant. Pour chaque **symptôme** rapporté, l'**infirmier** indiquera l'intensité– « Léger », « Modéré » ou « Sévère » – en fonction du ressenti du participant, si un contact avec le personnel médical (autre que celui de l'étude) a été fait et si le symptôme est encore présent au jour de la visite.
- L'intensité est en générale définis comme suit :
  - Léger : le symptôme n'interfère pas avec les activités quotidiennes du participant.
  - Modéré : le symptôme se traduit par un faible niveau de désagrément. Il peut causer une certaine interférence avec les activités quotidiennes.
  - Sévère : le symptôme interrompt/perturbe l'activité quotidienne habituelle du participant. Un symptôme sévère est habituellement incapacitant.
- Pour certains symptômes indiqués dans l'eCRF, la gradation spécifique suivante peut être utilisée :
  - Sang dans les selles
    - Léger : Traces de sang non mélangé avec les selles
    - Modéré : Sang mélangé avec les selles.
    - Sévère : Diarrhée sanguinolente ou de couleur rouge ou noire.
  - Hématurie
    - Léger : Urine de couleur rose à rouge clair.
    - Modéré : Urine rouge foncé ou présence de petits caillots de sang.
    - Sévère : Gros caillots de sang, difficulté et douleurs pour uriner.
  - Eruption cutanée
    - Léger : Rougeur ou démangeaisons de la peau sur une partie ou la totalité du corps
    - Modéré : Eruption papulo-nodulaire ou desquamation légère ou petites plaies.
    - Sévère : Ampoules/phlyctènes, ulcères ouverts, desquamation humide, éruption cutanée grave sur de grandes surfaces.

*En cas de symptômes légers en cours, l'infirmier peut traiter les symptômes en utilisant la pharmacie à disposition.*

*En cas de symptômes d'intensité modérée ou sévère en cours, le médecin doit évaluer l'enfant.*

- S'il n'y a aucun problème significatif, l'**infirmier** indiquera à la fin de l'eCRF « **Suivi symptômes** » que le participant est apte à recevoir le médicament à l'étude.

## Schisto/SOP/CLIN/01



## 4.5.1.3. Traitement étude

- **L'infirmier** peut ensuite donner l'AM.
- Il pèsera l'enfant à l'aide de la balance (l'enfant doit enlever ses chaussures) et note le poids dans l'eCRF « **Traitement étude** ».

*Si le poids est significativement différent de celui de la mesure précédente, un avertissement apparaîtra.*

*L'équipe chargée de l'étude doit alors repeser le patient. Si l'avertissement apparaît toujours après la deuxième pesée, l'identité des patients doit être vérifiée à nouveau et confirmée (la CIF doit être présentée).*

*Si l'identité du patient est confirmée, le médecin doit vérifier s'il existe une autre raison à cette différence.*

- La dose recommandée apparaîtra, calculé selon les dosages suivants :

| Dosage de l'Artésunate-Méfloquine |                                   |                                     |
|-----------------------------------|-----------------------------------|-------------------------------------|
| Poids du participant (kg)         | Nombre de comprimés               |                                     |
|                                   | Artésunate-Méfloquine<br>25/50 mg | Artésunate-Méfloquine<br>100/200 mg |
| 15 – 21                           | 3                                 | 0                                   |
| 22 – 27                           | 0                                 | 1                                   |
| 28 – 33                           | 1                                 | 1                                   |
| 34 – 39                           | 2                                 | 1                                   |
| 40 – 46                           | 3                                 | 1                                   |
| ≥ 47                              | 0                                 | 2                                   |

- L'administration d'AM peut être retardée, à condition que les trois doses soit données dans une période de 5 jours maximum. Toute dose qui ne peut (plus) être administrée dans ce délai sera annulée. Le participant restera dans l'étude.
- **Les infirmiers** surveilleront les enfants pendant deux heures après la prise des médicaments.
  - *Si l'enfant vomit il s'agit d'un événement indésirable (EI). Voir le « SchistoSOPCLIN02- PRISE\_EN\_CHARGE\_RAPPORT\_EI » pour prise en charge.*
    - *dans les 30 premières minutes, il sera réévalué par le **médecin**, et devra reprendre la dose complète. Cet événement sera noté dans l'eCRF.*
    - *Si l'enfant vomit entre 30 min et 2 heures après la prise du médicament, la moitié de la dose sera de nouveau administrée.*
  - *En cas de vomissements répétés (à la deuxième prise), l'enfant sera exclu de l'intervention et la raison sera notée dans l'eCRF « **Fin étude** » :*
    - *Suivi des EI jusqu'à 1 mois après l'administration du médicament à l'étude*
    - *Continuer les activités d'étude, saufs les traitements d'étude. Symptômes ne seront plus enregistré comme EI après un mois après le traitement.*
    - *Donner PZQ à la semaine 48*

## 4.5.1.4. Détection paludisme

**Schisto/SOP/CLIN/01**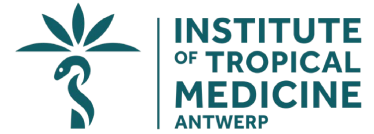

- L'**infirmier** demande l'enfant spécifiquement si un diagnostic de paludisme a été fait depuis la dernière visite.

*Si oui, l'**infirmier** vérifie la date et le lieu du diagnostic. Il s'agit de paludisme clinique.  
Voir le « SchistoSOPCLIN02-PRISE EN CHARGE RAPPORT EI » pour prise en charge.*

## Schisto/SOP/CLIN/01



## 4.5.2. Jours 1 et 2 (bras AM seulement)

Dans le bras AM, le **médecin** et l'**infirmier** reverront les enfants sur le site d'étude pour la seconde (J1) et la troisième (J2) administration du deuxième traitement d'AM.

- L'**infirmier** appellera un par un tous les participants, selon la liste pré établie à ce fin. Sur ce liste il indiquera la présence ou absence de l'enfant.
- Sur la base du numéro d'identification, le fichier correspondant au participant sera sélectionné sur la tablette informatique.
- Avant de distribuer le médicament, l'**infirmier** interrogera l'enfant en se basant sur les questions dans les eCRF de la visite « S6 J1 » ou « S6 J2 », à savoir sur les médicaments éventuellement pris (eCRF « **Suivi médicaments**») et les symptômes éventuellement survenus (eCRF « **Suivi symptômes** ») depuis la dernière visite.
- L'intervalle maximum pour compléter les trois administrations de AM est 5 jours. Une dose qui n'a pas été administrée dans cet intervalle ne devrait plus être administrée. L'enfant reste inclus dans l'étude.

## 4.5.2.1. Suivi Médicaments

- L'**infirmier** vérifie si l'enfant a pris un médicament antipaludéen ou le PZQ.
- Il vérifie aussi s'il a pris des autres médicaments.
- Pour *chaque* nouveau traitement pris (aussi pour le PZQ et les ACT), le eCRF « **Médicaments** » doit être rempli et le **médecin** s'assure qu'il n'y a pas d'interaction avec le traitement AM (voir liste ci-dessous). S'il y a interaction, il doit décider de retarder le don de AM ou bien d'exclure l'enfant selon le médicament pris et son indication.

| Liste de médication concomitante non autorisée |                               |                                                 |
|------------------------------------------------|-------------------------------|-------------------------------------------------|
| Catégorie                                      | Nom de la substance           | Dénomination commerciale et dosages disponibles |
| Médicaments cardiaques                         | Amiodarone                    | Cordarone 200                                   |
|                                                | Sotalol                       | Sotalex 80                                      |
| Anticonvulsivants                              | Carbamazépine                 | Tegretol 200, LP 200, LP 400                    |
|                                                | Phénobarbital                 | <b>Gardenal 50, 100 - Phénobarbital</b>         |
|                                                | Phénytoïne                    | Di Hydan 100                                    |
|                                                | Acide valproïque              | Depakine 200, 500, 500 Chrono                   |
| Antipaludéens                                  | Quinine                       | QURSINA 250                                     |
|                                                | Artemether/lumefantrine       | Cortem 80/480                                   |
|                                                | Artesunate/amodiaquine        | Camoquin                                        |
|                                                | Dihydroartémisine/piperaquine | Malacur cp                                      |
| Antibiotiques                                  | Ampicilline                   | <b>Ampicilline inj/gel</b>                      |
|                                                | Tétracycline                  | Large gamme                                     |
|                                                | Rifampicine                   | Rifamycine collyre                              |
|                                                | Quinolones                    | Cifran cp                                       |
|                                                | metronidazole                 | metronidazole                                   |
|                                                | Kétoconazole                  | (Ketoderm cr)                                   |



## Schisto/SOP/CLIN/01

|                                     |                                                |                                        |
|-------------------------------------|------------------------------------------------|----------------------------------------|
| <b>Psychotropes</b>                 |                                                |                                        |
| <b>Antidépresseurs tricycliques</b> | Amitriptyline<br>Imipramine<br>Levomepromazine | Laroxyl 25<br>Anafranil<br>Nozinan 100 |
| <b>Antipsychotiques</b>             | Halopéridol                                    | Haldol goutte                          |
| <b>Prokinétiques</b>                | Métoclopramide.                                | Primperan                              |

Attention : les médicaments en "épaisse" sont disponible dans le district sanitaire de Richard Toll

## 4.5.2.2. Suivi symptômes

- **L'infirmier** prendra la température avec un thermomètre tympanique. Afin d'obtenir une bonne lecture, il suivra les instructions suivantes :
  - Retirez le thermomètre du socle. Appuyez sur le bouton Marche/arrêt. Pendant un autocontrôle interne, tous les voyants s'affichent à l'écran. La dernière température prise s'affiche ensuite pendant 5 secondes.
  - L'indicateur d'embout jetable clignote pour signaler qu'un embout jetable est nécessaire. Fixez un embout jetable en poussant la sonde du thermomètre directement dans l'embout jetable à l'intérieur de la boîte, puis en la ressortant.  
*Remarque* : Le thermomètre ThermoScan Braun ne fonctionne pas tant qu'il ne comporte pas d'embout jetable.
  - Pour obtenir des mesures précises, assurez-vous que l'embout jetable est propre, avant chaque relevé de température. Sinon, nettoyez-le. En cas de besoin appuyez sur le bouton Eject pour retirer et jeter l'embout jetable utilisé et installez-en un nouveau et propre.
  - Sélectionnez l'âge à l'aide du bouton Age Precision™. Appuyez sur le bouton pour passer d'un groupe d'âge à l'autre. ThermoScan affiche par défaut la dernière tranche d'âge utilisée si vous ne la modifiez pas

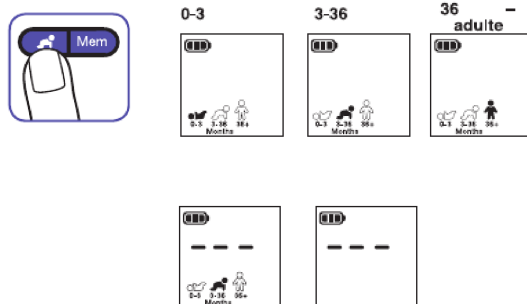

- Ajustez bien la sonde dans le conduit auditif, puis poussez et relâchez le bouton Start. Le voyant lumineux ExacTemp clignote pendant la prise de température. Si la sonde a été correctement introduite dans le conduit auditif pendant la mesure, un long bip signale la fin de la mesure. Le résultat s'affiche à l'écran

## Schisto/SOP/CLIN/01



*Si une fièvre (> 38°C) est observée, il s'agit d'un événement indésirable.  
Voir le « SchistoSOPCLIN02-PRISE EN CHARGE RAPPORT EI » pour prise en charge.*

- **L'infirmier** parcourt la liste des symptômes potentiels avec l'enfant. Pour chaque **symptôme** rapporté, **l'infirmier** indiquera l'intensité– « Léger », « Modéré » ou « Sévère » – en fonction du ressenti du participant, si un contact avec le personnel médical (autre que celui de l'étude) a été fait et si le symptôme est encore présent au jour de la visite.
- L'intensité est en générale définis comme suit :
  - Léger : le symptôme n'interfère pas avec les activités quotidiennes du participant.
  - Modéré : le symptôme se traduit par un faible niveau de désagrément. Il peut causer une certaine interférence avec les activités quotidiennes.
  - Sévère : le symptôme interrompt/perturbe l'activité quotidienne habituelle du participant. Un symptôme sévère est habituellement incapacitant.
- Pour certains symptômes indiqués dans l'eCRF, la gradation spécifique suivante peut être utilisée :
  - Sang dans les selles
    - Léger : Traces de sang non mélangé avec les selles
    - Modéré : Sang mélangé avec les selles.
    - Sévère : Diarrhée sanguinolente ou de couleur rouge ou noire.
  - Hématurie
    - Léger : Urine de couleur rose à rouge clair.
    - Modéré : Urine rouge foncé ou présence de petits caillots de sang.
    - Sévère : Gros caillots de sang, difficulté et douleurs pour uriner.
  - Eruption cutanée
    - Léger : Rougeur ou démangeaisons de la peau sur une partie ou la totalité du corps
    - Modéré : Eruption papulo-nodulaire ou desquamation légère ou petites plaies.
    - Sévère : Ampoules/phlyctènes, ulcères ouverts, desquamation humide, éruption cutanée grave sur de grandes surfaces.

*En cas de symptômes légers en cours, **l'infirmier** peut traiter les symptômes en utilisant la pharmacie à disposition.*

*En cas de symptômes d'intensité modérée ou sévère, il s'agit d'un événement indésirable. Voir le « SchistoSOPCLIN02-PRISE EN CHARGE RAPPORT EI » pour prise en charge.*

- S'il n'y a aucun problème significatif, **l'infirmier** indiquera à la fin de l'eCRF « **Suivi symptômes** » que le participant est apte à recevoir le médicament à l'étude.

## Schisto/SOP/CLIN/01



## 4.5.2.3. Traitement étude

- **L'infirmier** peut ensuite donner l'AM.
- Il pèsera l'enfant à l'aide de la balance (l'enfant doit enlever ses chaussures) et note le poids dans l'eCRF « **Traitement étude** ».

*Si le poids est significativement différent de celui de la mesure précédente, un avertissement apparaîtra.*

*L'équipe chargée de l'étude doit alors repeser le patient. Si l'avertissement apparaît toujours après la deuxième pesée, l'identité des patients doit être vérifiée à nouveau et confirmée (la CIF doit être présentée).*

*Si l'identité du patient est confirmée, le médecin doit vérifier s'il existe une autre raison à cette différence.*

- La dose recommandée apparaîtra, calculé selon les dosages suivants :

| Dosage de l'Artésunate-Méfloquine |                                   |                                     |
|-----------------------------------|-----------------------------------|-------------------------------------|
| Poids du participant (kg)         | Nombre de comprimés               |                                     |
|                                   | Artésunate-Méfloquine<br>25/50 mg | Artésunate-Méfloquine<br>100/200 mg |
| 15 – 21                           | 3                                 | 0                                   |
| 22 – 27                           | 0                                 | 1                                   |
| 28 – 33                           | 1                                 | 1                                   |
| 34 – 39                           | 2                                 | 1                                   |
| 40 – 46                           | 3                                 | 1                                   |
| ≥ 47                              | 0                                 | 2                                   |

- L'administration d'AM peut être retardée, à condition que les trois doses soit données dans une période de 5 jours maximum. Toute dose qui ne peut (plus) être administrée dans ce délai sera annulée. Le participant restera dans l'étude.
- **Les infirmiers** surveilleront les enfants pendant deux heures après la prise des médicaments.
  - *Si l'enfant vomit il s'agit d'un événement indésirable (EI). Voir le « SchistoSOPCLIN02- PRISE\_EN\_CHARGE\_RAPPORT\_EI » pour prise en charge.*
    - *dans les 30 premières minutes, il sera réévalué par le **médecin**, et devra reprendre la dose complète. Cet événement sera noté dans l'eCRF.*
    - *Si l'enfant vomit entre 30 min et 2 heures après la prise du médicament, la moitié de la dose sera de nouveau administrée.*
  - *En cas de vomissements répétés (à la deuxième prise), l'enfant sera exclu de l'intervention et la raison sera notée dans l'eCRF « **Fin étude** » :*
    - *Suivi des EI jusqu'à 1 mois après l'administration du médicament à l'étude*
    - *Continuer les activités d'étude, saufs les traitements d'étude. Symptômes ne seront plus enregistré comme EI après un mois après le traitement.*
    - *Donner PZQ à la semaine 48*

## Schisto/SOP/CLIN/01



## 4.6. Visite de suivi deuxième traitement - Jour 7 (bras AM seulement)

- **Les infirmiers** visiteront à domicile tous les enfants (des deux bras d'étude) sept jours après l'administration du deuxième traitement.
- **Les infirmiers** prendront la température et interrogeront les enfants en utilisant la liste systématique des questions apparaissant dans l'eCRF « **Suivi médicaments** », l'eCRF « **Suivi symptômes** », et l'eCRF « **Détection de paludisme** ».
- En cas de visite manquée, si après 3 jours, aucune information ne peut être récupérée, aucune autre tentative ne doit être faite.

## 4.6.1. Suivi Médicaments

- **L'infirmier** vérifie si l'enfant a pris un médicament antipaludéen ou le PZQ.
- Il vérifie aussi s'il a pris des autres médicaments.
- Pour chaque nouveau traitement pris (aussi pour le PZQ et les ACT), le eCRF « **Médicaments** » doit être rempli.

## 4.6.2. Suivi symptômes

- **L'infirmier** prendra la température avec un thermomètre tympanique. Afin d'obtenir une bonne lecture, il suivra les instructions suivantes :
  - Retirez le thermomètre du socle. Appuyez sur le bouton Marche/arrêt. Pendant un autocontrôle interne, tous les voyants s'affichent à l'écran. La dernière température prise s'affiche ensuite pendant 5 secondes.
  - L'indicateur d'embout jetable clignote pour signaler qu'un embout jetable est nécessaire. Fixez un embout jetable en poussant la sonde du thermomètre directement dans l'embout jetable à l'intérieur de la boîte, puis en la ressortant.  
*Remarque* : Le thermomètre ThermoScan Braun ne fonctionne pas tant qu'il ne comporte pas d'embout jetable.
  - Pour obtenir des mesures précises, assurez-vous que l'embout jetable est propre, avant chaque relevé de température. Sinon, nettoyez-le. En cas de besoin appuyez sur le bouton Eject pour retirer et jeter l'embout jetable utilisé et installez-en un nouveau et propre.
  - Sélectionnez l'âge à l'aide du bouton Age Precision™. Appuyez sur le bouton pour passer d'un groupe d'âge à l'autre. ThermoScan affiche par défaut la dernière tranche d'âge utilisée si vous ne la modifiez pas

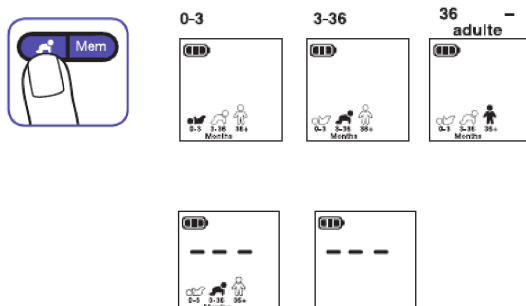

## Schisto/SOP/CLIN/01



- Ajustez bien la sonde dans le conduit auditif, puis poussez et relâchez le bouton Start. Le voyant lumineux ExacTemp clignote pendant la prise de température. Si la sonde a été correctement introduite dans le conduit auditif pendant la mesure, un long bip signale la fin de la mesure. Le résultat s'affiche à l'écran

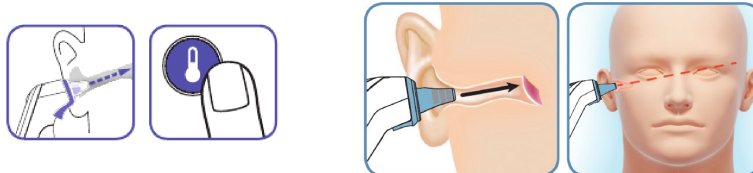

Si une fièvre (> 38°C) est observée, il s'agit d'un événement indésirable.  
Voir le « SchistoSOPCLIN02-PRISE EN CHARGE RAPPORT EI » pour prise en charge.

- **L'infirmier** parcourt la liste des symptômes potentiels avec l'enfant. Pour chaque **symptôme** rapporté, **l'infirmier** indiquera l'intensité– « Léger », « Modéré » ou « Sévère » – en fonction du ressenti du participant, si un contact avec le personnel médical (autre que celui de l'étude) a été fait et si le symptôme est encore présent au jour de la visite.
- L'intensité est en générale définis comme suit :
  - Léger : le symptôme n'interfère pas avec les activités quotidiennes du participant.
  - Modéré : le symptôme se traduit par un faible niveau de désagrément. Il peut causer une certaine interférence avec les activités quotidiennes.
  - Sévère : le symptôme interrompt/perturbe l'activité quotidienne habituelle du participant. Un symptôme sévère est habituellement incapacitant.
- Pour certains symptômes indiqués dans l'eCRF, la gradation spécifique suivante peut être utilisée :
  - Sang dans les selles
    - Léger : Traces de sang non mélangé avec les selles
    - Modéré : Sang mélangé avec les selles.
    - Sévère : Diarrhée sanguinolente ou de couleur rouge ou noire.
  - Hématurie
    - Léger : Urine de couleur rose à rouge clair.
    - Modéré : Urine rouge foncé ou présence de petits caillots de sang.
    - Sévère : Gros caillots de sang, difficulté et douleurs pour uriner.
  - Eruption cutanée
    - Léger : Rougeur ou démangeaisons de la peau sur une partie ou la totalité du corps
    - Modéré : Eruption papulo-nodulaire ou desquamation légère ou petites plaies.
    - Sévère : Ampoules/phlyctènes, ulcères ouverts, desquamation humide, éruption cutanée grave sur de grandes surfaces.

En cas de symptômes légers en cours, l'infirmier peut traiter les symptômes en utilisant la pharmacie à disposition (après avis médical par téléphone si nécessaire).

**Schisto/SOP/CLIN/01**

En cas de symptômes d'intensité modérée ou sévère, il s'agit d'un événement indésirable.  
L'infirmier indique sur le « Journal d'activités » les observations éventuels et qu'il y a un EI à rapporter. Voir le « SchistoSOPCLIN02-PRISE EN CHARGE RAPPORT EI » pour prise en charge.

## 4.3.3. Détection paludisme

- L'infirmier demande l'enfant spécifiquement si un diagnostic de paludisme a été fait depuis la dernière visite.

Si oui, l'infirmier vérifie la date et le lieu du diagnostic. Il s'agit d'un EI spécifique, le paludisme clinique. Voir le « SchistoSOPCLIN02-PRISE EN CHARGE RAPPORT EI » pour prise en charge.

## Schisto/SOP/CLIN/01



### 4.7. Visite d'évaluation de l'efficacité parasitologique du deuxième traitement (semaine 10) (Bras AM et PZQ)

Cette visite est destinée à la collecte des urines et des selles pour l'évaluation de l'efficacité parasitologique des traitements. (Voir SchistoSOPLAB01)

Durant cette visite, médicament concomittants, la tolérance aux traitement à l'étude sera, ainsi que les symptômes de Schistosomiase et les épisodes de paludisme éventuellement survenues seront également évaluées.

#### 4.7.1. Suivi Médicaments (Bras AM et PZQ)

- **L'infirmier** vérifie si l'enfant a pris un médicament antipaludéen ou le PZQ.
- Il vérifie aussi s'il a pris des autres médicaments.
- Pour *chaque* nouveau traitement pris (aussi pour le PZQ et les ACT), le eCRF « **Médicaments** » doit être rempli.

#### 4.7.2. Suivi symptômes (Bras AM seulement)

- **L'infirmier** prendra la température avec un thermomètre tympanique. Afin d'obtenir une bonne lecture, il suivra les instructions suivantes :
  - Retirez le thermomètre du socle. Appuyez sur le bouton Marche/arrêt. Pendant un autocontrôle interne, tous les voyants s'affichent à l'écran. La dernière température prise s'affiche ensuite pendant 5 secondes.
  - L'indicateur d'embout jetable clignote pour signaler qu'un embout jetable est nécessaire. Fixez un embout jetable en poussant la sonde du thermomètre directement dans l'embout jetable à l'intérieur de la boîte, puis en la ressortant.  
*Remarque* : Le thermomètre ThermoScan Braun ne fonctionne pas tant qu'il ne comporte pas d'embout jetable.
  - Pour obtenir des mesures précises, assurez-vous que l'embout jetable est propre, avant chaque relevé de température. Sinon, nettoyez-le. En cas de besoin appuyez sur le bouton Eject pour retirer et jeter l'embout jetable utilisé et installez-en un nouveau et propre.
  - Sélectionnez l'âge à l'aide du bouton Age Precision™. Appuyez sur le bouton pour passer d'un groupe d'âge à l'autre. ThermoScan affiche par défaut la dernière tranche d'âge utilisée si vous ne la modifiez pas

## Schisto/SOP/CLIN/01

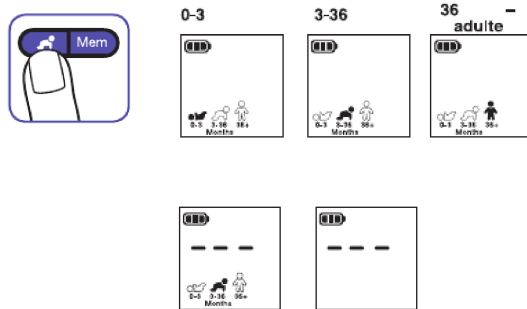

- Ajustez bien la sonde dans le conduit auditif, puis poussez et relâchez le bouton Start. Le voyant lumineux ExacTemp clignote pendant la prise de température. Si la sonde a été correctement introduite dans le conduit auditif pendant la mesure, un long bip signale la fin de la mesure. Le résultat s'affiche à l'écran

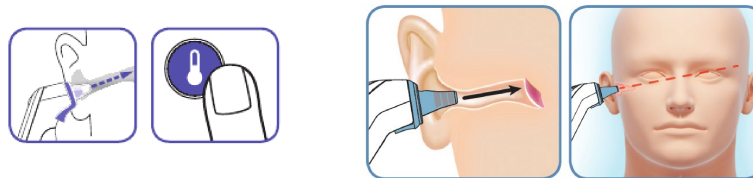

Si une fièvre (> 38°C) est observée, il s'agit d'un événement indésirable.

Voir le « SchistoSOPCLIN02-PRISE EN CHARGE RAPPORT EI » pour prise en charge.

- **L'infirmier** parcourt la liste des symptômes potentiels avec l'enfant. Pour chaque **symptôme** rapporté, **l'infirmier** indiquera l'intensité– « Léger », « Modéré » ou « Sévère » – en fonction du ressenti du participant, si un contact avec le personnel médical (autre que celui de l'étude) a été fait et si le symptôme est encore présent au jour de la visite.
- L'intensité est en générale définis comme suit :
  - Léger : le symptôme n'interfère pas avec les activités quotidiennes du participant.
  - Modéré : le symptôme se traduit par un faible niveau de désagrément. Il peut causer une certaine interférence avec les activités quotidiennes.
  - Sévère : le symptôme interrompt/perturbe l'activité quotidienne habituelle du participant. Un symptôme sévère est habituellement incapacitant.
- Pour certains symptômes indiqués dans l'eCRF, la gradation spécifique suivante peut être utilisée :
  - Sang dans les selles
    - Léger : Traces de sang non mélangé avec les selles
    - Modéré : Sang mélangé avec les selles.
    - Sévère : Diarrhée sanguinolente ou de couleur rouge ou noire.
  - Hématurie
    - Léger : Urine de couleur rose à rouge clair.
    - Modéré : Urine rouge foncé ou présence de petits caillots de sang.
    - Sévère : Gros caillots de sang, difficulté et douleurs pour uriner.
  - Eruption cutanée



## Schisto/SOP/CLIN/01



Léger : Rougeur ou démangeaisons de la peau sur une partie ou la totalité du corps  
Modéré : Eruption papulo-nodulaire ou desquamation légère ou petites plaies.  
Sévère : Ampoules/phlyctènes, ulcères ouverts, desquamation humide, éruption cutanée grave sur de grandes surfaces.

En cas de symptômes légers en cours, l'infirmier peut traiter les symptômes en utilisant la pharmacie à disposition (après avis médical par téléphone si nécessaire).

En cas de symptômes d'intensité modérée ou sévère, il s'agit d'un événement indésirable. L'infirmier indique sur le « Journal d'activités » les observations éventuels et qu'il y a un EI à rapporter. Voir le « SchistoSOPCLIN02-PRISE EN CHARGE RAPPORT EI » pour prise en charge.

### 4.7.3. Détection paludisme (Bras AM et PZQ)

- **L'infirmier** demande l'enfant spécifiquement si un diagnostic de paludisme a été fait depuis la dernière visite.

Si oui, l'infirmier vérifie la date et le lieu du diagnostic. Il s'agit de paludisme clinique. Voir le « SchistoSOPCLIN02-PRISE EN CHARGE RAPPORT EI » pour prise en charge.

## Schisto/SOP/CLIN/01



## 4.8. Visite d'administration du deuxième traitement (Bras AM seulement)

## 4.8.1. Jour 0

- A la première visite d'administration du troisième traitement (jour 0), **l'infirmier** appellera un par un tous les participants qui ont été randomisés pour prendre l'AM. Une liste sera établie à ce fin préalablement. Sur ce liste il indiquera la présence ou absence de l'enfant.
- Sur la base du numéro d'identification, le fichier correspondant au participant sera sélectionné sur la tablette informatique.
- Avant de distribuer le médicament, **l'infirmier** interrogera l'enfant en se basant sur les questions dans les eCRF de la visite « S12 J0 », à savoir sur les médicaments éventuellement pris (eCRF « **Suivi médicaments**») et les symptômes éventuellement survenus (eCRF « **Suivi symptômes** ») depuis la dernière visite.

## 4.8.1.1. Suivi Médicaments

- **L'infirmier** vérifie si l'enfant a pris un médicament antipaludéen ou le PZQ.
- Il vérifie aussi s'il a pris des autres médicaments.
- Pour *chaque* nouveau traitement pris (aussi pour le PZQ et les ACT), le eCRF « **Médicaments** » doit être rempli et **le médecin** s'assure qu'il n'y a pas d'interaction avec le traitement AM (voir liste ci-dessous). S'il y a interaction, il doit décider de retarder le don de AM ou bien d'exclure l'enfant selon le médicament pris et son indication.

| Liste de médication concomitante non autorisée |                               |                                                 |
|------------------------------------------------|-------------------------------|-------------------------------------------------|
| Catégorie                                      | Nom de la substance           | Dénomination commerciale et dosages disponibles |
| Médicaments cardiaques                         | Amiodarone                    | Cordarone 200                                   |
|                                                | Sotalol                       | Sotalex 80                                      |
| Anticonvulsivants                              | Carbamazépine                 | Tegretol 200, LP 200, LP 400                    |
|                                                | Phénobarbital                 | <b>Gardenal 50, 100 - Phénobarbital</b>         |
|                                                | Phénytoïne                    | Di Hydan 100                                    |
|                                                | Acide valproïque              | Depakine 200, 500, 500 Chrono                   |
| Antipaludéens                                  | Quinine                       | QURSINA 250                                     |
|                                                | Artemether/lumefantrine       | Cortem 80/480                                   |
|                                                | Artesunate/amodiaquine        | Camoquin                                        |
|                                                | Dihydroartémisine/piperaquine | Malacur cp                                      |
| Antibiotiques                                  | Ampicilline                   | <b>Ampicilline inj/gel</b>                      |
|                                                | Tétracycline                  | Large gamme                                     |
|                                                | Rifampicine                   | Rifamycine collyre                              |
|                                                | Quinolones                    | Cifran cp                                       |
|                                                | metronidazole                 | metronidazole                                   |
|                                                | Kétoconazole                  | (Ketoderm cr)                                   |

## Schisto/SOP/CLIN/01



|                                     |                                                |                                        |
|-------------------------------------|------------------------------------------------|----------------------------------------|
| <b>Psychotropes</b>                 |                                                |                                        |
| <b>Antidépresseurs tricycliques</b> | Amitriptyline<br>Imipramine<br>Levomepromazine | Laroxyl 25<br>Anafranil<br>Nozinan 100 |
| <b>Antipsychotiques</b>             | Halopéridol                                    | Haldol goutte                          |
| <b>Prokinétiques</b>                | Métoclopramide.                                | Primperan                              |

Attention : les médicaments en "épaisse" sont disponible dans le district sanitaire de Richard Toll

## 4.8.1.2. Suivi symptômes

- **L'infirmier** prendra la température avec un thermomètre tympanique. Afin d'obtenir une bonne lecture, il suivra les instructions suivantes :
  - Retirez le thermomètre du socle. Appuyez sur le bouton Marche/arrêt. Pendant un autocontrôle interne, tous les voyants s'affichent à l'écran. La dernière température prise s'affiche ensuite pendant 5 secondes.
  - L'indicateur d'embout jetable clignote pour signaler qu'un embout jetable est nécessaire. Fixez un embout jetable en poussant la sonde du thermomètre directement dans l'embout jetable à l'intérieur de la boîte, puis en la ressortant.  
*Remarque* : Le thermomètre ThermoScan Braun ne fonctionne pas tant qu'il ne comporte pas d'embout jetable.
  - Pour obtenir des mesures précises, assurez-vous que l'embout jetable est propre, avant chaque relevé de température. Sinon, nettoyez-le. En cas de besoin appuyez sur le bouton Eject pour retirer et jeter l'embout jetable utilisé et installez-en un nouveau et propre.
  - Sélectionnez l'âge à l'aide du bouton Age Precision™. Appuyez sur le bouton pour passer d'un groupe d'âge à l'autre. ThermoScan affiche par défaut la dernière tranche d'âge utilisée si vous ne la modifiez pas

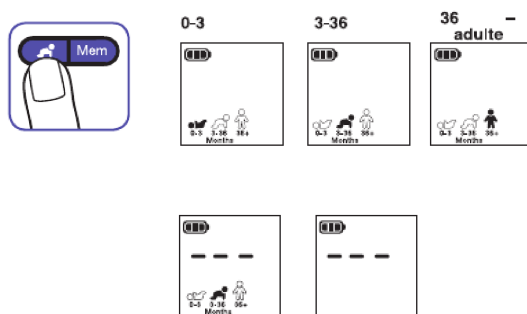

- Ajustez bien la sonde dans le conduit auditif, puis poussez et relâchez le bouton Start. Le voyant lumineux ExacTemp clignote pendant la prise de température. Si la sonde a été correctement introduite dans le conduit auditif pendant la mesure, un long bip signale la fin de la mesure. Le résultat s'affiche à l'écran

## Schisto/SOP/CLIN/01



*Si une fièvre (> 38°C) est observée, **le médecin** doit évaluer l'enfant. Ce dernier le réfèrera au poste de santé avec des instructions écrites.*

- **L'infirmier** parcourt la liste des symptômes potentiels avec l'enfant. Pour chaque **symptôme** rapporté, **l'infirmier** indiquera l'intensité– « Léger », « Modéré » ou « Sévère » – en fonction du ressenti du participant, si un contact avec le personnel médical (autre que celui de l'étude) a été fait et si le symptôme est encore présent au jour de la visite.
- L'intensité est en générale définis comme suit :
  - Léger : le symptôme n'interfère pas avec les activités quotidiennes du participant.
  - Modéré : le symptôme se traduit par un faible niveau de désagrément. Il peut causer une certaine interférence avec les activités quotidiennes.
  - Sévère : le symptôme interrompt/perturbe l'activité quotidienne habituelle du participant. Un symptôme sévère est habituellement incapacitant.
- Pour certains symptômes indiqués dans l'eCRF, la gradation spécifique suivante peut être utilisée :
  - Sang dans les selles
    - Léger : Traces de sang non mélangé avec les selles
    - Modéré : Sang mélangé avec les selles.
    - Sévère : Diarrhée sanguinolente ou de couleur rouge ou noire.
  - Hématurie
    - Léger : Urine de couleur rose à rouge clair.
    - Modéré : Urine rouge foncé ou présence de petits caillots de sang.
    - Sévère : Gros caillots de sang, difficulté et douleurs pour uriner.
  - Eruption cutanée
    - Léger : Rougeur ou démangeaisons de la peau sur une partie ou la totalité du corps
    - Modéré : Eruption papulo-nodulaire ou desquamation légère ou petites plaies.
    - Sévère : Ampoules/phlyctènes, ulcères ouverts, desquamation humide, éruption cutanée grave sur de grandes surfaces.

*En cas de symptômes légères en cours, **l'infirmier** peut traiter les symptômes en utilisant la pharmacie à disposition.*

*En cas de symptômes d'intensité modérée ou sévère en cours, **le médecin** doit évaluer l'enfant.*

- S'il n'y a aucun problème significatif, **l'infirmier** indiquera à la fin de l'eCRF « **Suivi symptômes** » que le participant est apte à recevoir le médicament à l'étude.

## Schisto/SOP/CLIN/01



## 4.8.1.3. Traitement étude

- **L'infirmier** peut ensuite donner l'AM.
- Il pèsera l'enfant à l'aide de la balance (l'enfant doit enlever ses chaussures) et note le poids dans l'eCRF « **Traitement étude** ».

*Si le poids est significativement différent de celui de la mesure précédente, un avertissement apparaîtra.*

*L'équipe chargée de l'étude doit alors repeser le patient. Si l'avertissement apparaît toujours après la deuxième pesée, l'identité des patients doit être vérifiée à nouveau et confirmée (la CIF doit être présentée).*

*Si l'identité du patient est confirmée, le médecin doit vérifier s'il existe une autre raison à cette différence.*

- La dose recommandée apparaîtra, calculé selon les dosages suivants :

| Dosage de l'Artésunate-Méfloquine |                                   |                                     |
|-----------------------------------|-----------------------------------|-------------------------------------|
| Poids du participant (kg)         | Nombre de comprimés               |                                     |
|                                   | Artésunate-Méfloquine<br>25/50 mg | Artésunate-Méfloquine<br>100/200 mg |
| 15 – 21                           | 3                                 | 0                                   |
| 22 – 27                           | 0                                 | 1                                   |
| 28 – 33                           | 1                                 | 1                                   |
| 34 – 39                           | 2                                 | 1                                   |
| 40 – 46                           | 3                                 | 1                                   |
| ≥ 47                              | 0                                 | 2                                   |

- L'administration d'AM peut être retardée, à condition que les trois doses soit données dans une période de 5 jours maximum. Toute dose qui ne peut (plus) être administrée dans ce délai sera annulée. Le participant restera dans l'étude.
- **Les infirmiers** surveilleront les enfants pendant deux heures après la prise des médicaments.
  - *Si l'enfant vomit il s'agit d'un événement indésirable (EI). Voir le « SchistoSOPCLIN02- PRISE\_EN\_CHARGE\_RAPPORT\_EI » pour prise en charge.*
    - *dans les 30 premières minutes, il sera réévalué par le **médecin**, et devra reprendre la dose complète. Cet événement sera noté dans l'eCRF.*
    - *Si l'enfant vomit entre 30 min et 2 heures après la prise du médicament, la moitié de la dose sera de nouveau administrée.*
  - *En cas de vomissements répétés (à la deuxième prise), l'enfant sera exclu de l'intervention et la raison sera notée dans l'eCRF « **Fin étude** » :*
    - *Suivi des EI jusqu'à 1 mois après l'administration du médicament à l'étude*
    - *Continuer les activités d'étude, saufs les traitements d'étude. Symptômes ne seront plus enregistré comme EI après un mois après le traitement.*
    - *Donner PZQ à la semaine 48*

## 4.8.1.4. Détection paludisme

**Schisto/SOP/CLIN/01**

- L'**infirmier** demande l'enfant spécifiquement si un diagnostic de paludisme a été fait depuis la dernière visite.

*Si oui, l'**infirmier** vérifie la date et le lieu du diagnostic. Il s'agit de paludisme clinique.  
Voir le « SchistoSOPCLIN02-PRISE EN CHARGE RAPPORT EI » pour prise en charge.*

## Schisto/SOP/CLIN/01



## 4.8.2. Jours 1 et 2 (bras AM seulement)

Dans le bras AM, le **médecin** et l'**infirmier** reverront les enfants sur le site d'étude pour la seconde (J1) et la troisième (J2) administration du troisième traitement d'AM.

- L'**infirmier** appellera un par un tous les participants, selon la liste pré établie à ce fin. Sur ce liste il indiquera la présence ou absence de l'enfant.
- Sur la base du numéro d'identification, le fichier correspondant au participant sera sélectionné sur la tablette informatique.
- Avant de distribuer le médicament, l'**infirmier** interrogera l'enfant en se basant sur les questions dans les eCRF de la visite « S12 J1 » ou « S12 J2 », à savoir sur les médicaments éventuellement pris (eCRF « **Suivi médicaments**») et les symptômes éventuellement survenus (eCRF « **Suivi symptômes** ») depuis la dernière visite.
- L'intervalle maximum pour compléter les trois administrations de AM est 5 jours. Une dose qui n'a pas été administrée dans cet intervalle ne devrait plus être administrée. L'enfant reste inclus dans l'étude.

## 4.8.2.1. Suivi Médicaments

- L'**infirmier** vérifie si l'enfant a pris un médicament antipaludéen ou le PZQ.
- Il vérifie aussi s'il a pris des autres médicaments.
- Pour *chaque* nouveau traitement pris (aussi pour le PZQ et les ACT), le eCRF « **Médicaments** » doit être rempli et le **médecin** s'assure qu'il n'y a pas d'interaction avec le traitement AM (voir liste ci-dessous). S'il y a interaction, il doit décider de retarder le don de AM ou bien d'exclure l'enfant selon le médicament pris et son indication.

| Liste de médication concomitante non autorisée |                               |                                                 |
|------------------------------------------------|-------------------------------|-------------------------------------------------|
| Catégorie                                      | Nom de la substance           | Dénomination commerciale et dosages disponibles |
| Médicaments cardiaques                         | Amiodarone                    | Cordarone 200                                   |
|                                                | Sotalol                       | Sotalex 80                                      |
| Anticonvulsivants                              | Carbamazépine                 | Tegretol 200, LP 200, LP 400                    |
|                                                | Phénobarbital                 | <b>Gardenal 50, 100 - Phénobarbital</b>         |
|                                                | Phénytoïne                    | Di Hydan 100                                    |
|                                                | Acide valproïque              | Depakine 200, 500, 500 Chrono                   |
| Antipaludéens                                  | Quinine                       | QURSINA 250                                     |
|                                                | Artemether/lumefantrine       | Cortem 80/480                                   |
|                                                | Artesunate/amodiaquine        | Camoquin                                        |
|                                                | Dihydroartémisine/piperaquine | Malacur cp                                      |
| Antibiotiques                                  | Ampicilline                   | <b>Ampicilline inj/gel</b>                      |
|                                                | Tétracycline                  | Large gamme                                     |
|                                                | Rifampicine                   | Rifamycine collyre                              |
|                                                | Quinolones                    | Cifran cp                                       |
|                                                | metronidazole                 | metronidazole                                   |
|                                                | Kétoconazole                  | (Ketoderm cr)                                   |

## Schisto/SOP/CLIN/01



|                                     |                                                |                                        |
|-------------------------------------|------------------------------------------------|----------------------------------------|
| <b>Psychotropes</b>                 |                                                |                                        |
| <b>Antidépresseurs tricycliques</b> | Amitriptyline<br>Imipramine<br>Levomepromazine | Laroxyl 25<br>Anafranil<br>Nozinan 100 |
| <b>Antipsychotiques</b>             | Halopéridol                                    | Haldol goutte                          |
| <b>Prokinétiques</b>                | Métoclopramide.                                | Primperan                              |

Attention : les médicaments en "épaisse" sont disponible dans le district sanitaire de Richard Toll

## 4.8.2.2. Suivi symptômes

- **L'infirmier** prendra la température avec un thermomètre tympanique. Afin d'obtenir une bonne lecture, il suivra les instructions suivantes :
  - Retirez le thermomètre du socle. Appuyez sur le bouton Marche/arrêt. Pendant un autocontrôle interne, tous les voyants s'affichent à l'écran. La dernière température prise s'affiche ensuite pendant 5 secondes.
  - L'indicateur d'embout jetable clignote pour signaler qu'un embout jetable est nécessaire. Fixez un embout jetable en poussant la sonde du thermomètre directement dans l'embout jetable à l'intérieur de la boîte, puis en la ressortant.  
*Remarque* : Le thermomètre ThermoScan Braun ne fonctionne pas tant qu'il ne comporte pas d'embout jetable.
  - Pour obtenir des mesures précises, assurez-vous que l'embout jetable est propre, avant chaque relevé de température. Sinon, nettoyez-le. En cas de besoin appuyez sur le bouton Eject pour retirer et jeter l'embout jetable utilisé et installez-en un nouveau et propre.
  - Sélectionnez l'âge à l'aide du bouton Age Precision™. Appuyez sur le bouton pour passer d'un groupe d'âge à l'autre. ThermoScan affiche par défaut la dernière tranche d'âge utilisée si vous ne la modifiez pas

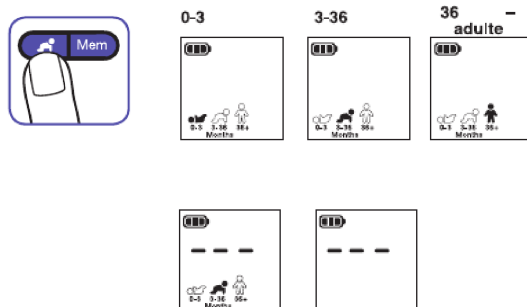

- Ajustez bien la sonde dans le conduit auditif, puis poussez et relâchez le bouton Start. Le voyant lumineux ExacTemp clignote pendant la prise de température. Si la sonde a été correctement introduite dans le conduit auditif pendant la mesure, un long bip signale la fin de la mesure. Le résultat s'affiche à l'écran



## Schisto/SOP/CLIN/01



*Si une fièvre (> 38°C) est observée, il s'agit d'un événement indésirable.  
Voir le « SchistoSOPCLIN02-PRISE EN CHARGE RAPPORT EI » pour prise en charge.*

- **L'infirmier** parcourt la liste des symptômes potentiels avec l'enfant. Pour chaque **symptôme** rapporté, **l'infirmier** indiquera l'intensité– « Léger », « Modéré » ou « Sévère » – en fonction du ressenti du participant, si un contact avec le personnel médical (autre que celui de l'étude) a été fait et si le symptôme est encore présent au jour de la visite.
- L'intensité est en générale définis comme suit :
  - Léger : le symptôme n'interfère pas avec les activités quotidiennes du participant.
  - Modéré : le symptôme se traduit par un faible niveau de désagrément. Il peut causer une certaine interférence avec les activités quotidiennes.
  - Sévère : le symptôme interrompt/perturbe l'activité quotidienne habituelle du participant. Un symptôme sévère est habituellement incapacitant.
- Pour certains symptômes indiqués dans l'eCRF, la gradation spécifique suivante peut être utilisée :
  - Sang dans les selles
    - Léger : Traces de sang non mélangé avec les selles
    - Modéré : Sang mélangé avec les selles.
    - Sévère : Diarrhée sanguinolente ou de couleur rouge ou noire.
  - Hématurie
    - Léger : Urine de couleur rose à rouge clair.
    - Modéré : Urine rouge foncé ou présence de petits caillots de sang.
    - Sévère : Gros caillots de sang, difficulté et douleurs pour uriner.
  - Eruption cutanée
    - Léger : Rougeur ou démangeaisons de la peau sur une partie ou la totalité du corps
    - Modéré : Eruption papulo-nodulaire ou desquamation légère ou petites plaies.
    - Sévère : Ampoules/phlyctènes, ulcères ouverts, desquamation humide, éruption cutanée grave sur de grandes surfaces.

*En cas de symptômes légers en cours, **l'infirmier** peut traiter les symptômes en utilisant la pharmacie à disposition.*

*En cas de symptômes d'intensité modérée ou sévère, il s'agit d'un événement indésirable. Voir le « SchistoSOPCLIN02-PRISE EN CHARGE RAPPORT EI » pour prise en charge.*

- S'il n'y a aucun problème significatif, **l'infirmier** indiquera à la fin de l'eCRF « **Suivi symptômes** » que le participant est apte à recevoir le médicament à l'étude.

## Schisto/SOP/CLIN/01



## 4.8.2.3. Traitement étude

- **L'infirmier** peut ensuite donner l'AM.
- Il pèsera l'enfant à l'aide de la balance (l'enfant doit enlever ses chaussures) et note le poids dans l'eCRF « **Traitement étude** ».

*Si le poids est significativement différent de celui de la mesure précédente, un avertissement apparaîtra.*

*L'équipe chargée de l'étude doit alors repeser le patient. Si l'avertissement apparaît toujours après la deuxième pesée, l'identité des patients doit être vérifiée à nouveau et confirmée (la CIF doit être présentée).*

*Si l'identité du patient est confirmée, le médecin doit vérifier s'il existe une autre raison à cette différence.*

- La dose recommandée apparaîtra, calculé selon les dosages suivants :

| Dosage de l'Artésunate-Méfloquine |                                   |                                     |
|-----------------------------------|-----------------------------------|-------------------------------------|
| Poids du participant (kg)         | Nombre de comprimés               |                                     |
|                                   | Artésunate-Méfloquine<br>25/50 mg | Artésunate-Méfloquine<br>100/200 mg |
| 15 – 21                           | 3                                 | 0                                   |
| 22 – 27                           | 0                                 | 1                                   |
| 28 – 33                           | 1                                 | 1                                   |
| 34 – 39                           | 2                                 | 1                                   |
| 40 – 46                           | 3                                 | 1                                   |
| ≥ 47                              | 0                                 | 2                                   |

- L'administration d'AM peut être retardée, à condition que les trois doses soit données dans une période de 5 jours maximum. Toute dose qui ne peut (plus) être administrée dans ce délai sera annulée. Le participant restera dans l'étude.
- **Les infirmiers** surveilleront les enfants pendant deux heures après la prise des médicaments.
  - *Si l'enfant vomit il s'agit d'un événement indésirable (EI). Voir le « SchistoSOPCLIN02- PRISE\_EN\_CHARGE\_RAPPORT\_EI » pour prise en charge.*
    - *dans les 30 premières minutes, il sera réévalué par le **médecin**, et devra reprendre la dose complète. Cet événement sera noté dans l'eCRF.*
    - *Si l'enfant vomit entre 30 min et 2 heures après la prise du médicament, la moitié de la dose sera de nouveau administrée.*
  - *En cas de vomissements répétés (à la deuxième prise), l'enfant sera exclu de l'intervention et la raison sera notée dans l'eCRF « **Fin étude** » :*
    - *Suivi des EI jusqu'à 1 mois après l'administration du médicament à l'étude*
    - *Continuer les activités d'étude, saufs les traitements d'étude. Symptômes ne seront plus enregistré comme EI après un mois après le traitement.*
    - *Donner PZQ à la semaine 48*

## Schisto/SOP/CLIN/01



## 4.9. Visite de suivi troisième traitement - Jour 7 (bras AM seulement)

- **Les infirmiers** visiteront à domicile tous les enfants (des deux bras d'étude) sept jours après l'administration du troisième traitement.
- **Les infirmiers** prendront la température et interrogeront les enfants en utilisant la liste systématique des questions apparaissant dans l'eCRF « **Suivi médicaments** », l'eCRF « **Suivi symptômes** », et l'eCRF « **Détection de paludisme** ».
- En cas de visite manquée, si après 3 jours, aucune information ne peut être récupérée, aucune autre tentative ne doit être faite.

## 4.9.1. Suivi Médicaments

- **L'infirmier** vérifie si l'enfant a pris un médicament antipaludéen ou le PZQ.
- Il vérifie aussi s'il a pris des autres médicaments.
- Pour chaque nouveau traitement pris (aussi pour le PZQ et les ACT), le eCRF « **Médicaments** » doit être rempli.

## 4.9.2. Suivi symptômes

- **L'infirmier** prendra la température avec un thermomètre tympanique. Afin d'obtenir une bonne lecture, il suivra les instructions suivantes :
  - Retirez le thermomètre du socle. Appuyez sur le bouton Marche/arrêt. Pendant un autocontrôle interne, tous les voyants s'affichent à l'écran. La dernière température prise s'affiche ensuite pendant 5 secondes.
  - L'indicateur d'embout jetable clignote pour signaler qu'un embout jetable est nécessaire. Fixez un embout jetable en poussant la sonde du thermomètre directement dans l'embout jetable à l'intérieur de la boîte, puis en la ressortant.  
*Remarque* : Le thermomètre ThermoScan Braun ne fonctionne pas tant qu'il ne comporte pas d'embout jetable.
  - Pour obtenir des mesures précises, assurez-vous que l'embout jetable est propre, avant chaque relevé de température. Sinon, nettoyez-le. En cas de besoin appuyez sur le bouton Eject pour retirer et jeter l'embout jetable utilisé et installez-en un nouveau et propre.
  - Sélectionnez l'âge à l'aide du bouton Age Precision™. Appuyez sur le bouton pour passer d'un groupe d'âge à l'autre. ThermoScan affiche par défaut la dernière tranche d'âge utilisée si vous ne la modifiez pas



## Schisto/SOP/CLIN/01



- Ajustez bien la sonde dans le conduit auditif, puis poussez et relâchez le bouton Start. Le voyant lumineux ExacTemp clignote pendant la prise de température. Si la sonde a été correctement introduite dans le conduit auditif pendant la mesure, un long bip signale la fin de la mesure. Le résultat s'affiche à l'écran



Si une fièvre (> 38°C) est observée, il s'agit d'un événement indésirable.  
Voir le « SchistoSOPCLIN02-PRISE EN CHARGE RAPPORT EI » pour prise en charge.

- **L'infirmier** parcourt la liste des symptômes potentiels avec l'enfant. Pour chaque **symptôme** rapporté, **l'infirmier** indiquera l'intensité– « Léger », « Modéré » ou « Sévère » – en fonction du ressenti du participant, si un contact avec le personnel médical (autre que celui de l'étude) a été fait et si le symptôme est encore présent au jour de la visite.
- L'intensité est en générale définis comme suit :
  - Léger : le symptôme n'interfère pas avec les activités quotidiennes du participant.
  - Modéré : le symptôme se traduit par un faible niveau de désagrément. Il peut causer une certaine interférence avec les activités quotidiennes.
  - Sévère : le symptôme interrompt/perturbe l'activité quotidienne habituelle du participant. Un symptôme sévère est habituellement incapacitant.
- Pour certains symptômes indiqués dans l'eCRF, la gradation spécifique suivante peut être utilisée :
  - Sang dans les selles
    - Léger : Traces de sang non mélangé avec les selles
    - Modéré : Sang mélangé avec les selles.
    - Sévère : Diarrhée sanguinolente ou de couleur rouge ou noire.
  - Hématurie
    - Léger : Urine de couleur rose à rouge clair.
    - Modéré : Urine rouge foncé ou présence de petits caillots de sang.
    - Sévère : Gros caillots de sang, difficulté et douleurs pour uriner.
  - Eruption cutanée
    - Léger : Rougeur ou démangeaisons de la peau sur une partie ou la totalité du corps
    - Modéré : Eruption papulo-nodulaire ou desquamation légère ou petites plaies.
    - Sévère : Ampoules/phlyctènes, ulcères ouverts, desquamation humide, éruption cutanée grave sur de grandes surfaces.

En cas de symptômes légers en cours, l'infirmier peut traiter les symptômes en utilisant la pharmacie à disposition (après avis médical par téléphone si nécessaire).

**Schisto/SOP/CLIN/01**

En cas de symptômes d'intensité modérée ou sévère, il s'agit d'un événement indésirable.  
L'infirmier indique sur le « Journal d'activités » les observations éventuels et qu'il y a un EI à rapporter. Voir le « SchistoSOPCLIN02-PRISE EN CHARGE RAPPORT EI » pour prise en charge.

## 4.9.3. Détection paludisme

- L'infirmier demande l'enfant spécifiquement si un diagnostic de paludisme a été fait depuis la dernière visite.

Si oui, l'infirmier vérifie la date et le lieu du diagnostic. Il s'agit d'un EI spécifique, le paludisme clinique. Voir le « SchistoSOPCLIN02-PRISE EN CHARGE RAPPORT EI » pour prise en charge.

## Schisto/SOP/CLIN/01



### 4.10. Visite d'évaluation de l'efficacité parasitologique du troisième traitement (semaine 16) (Bras AM et PZQ)

Cette visite est destinée à la collecte des urines et des selles pour l'évaluation de l'efficacité parasitologique des traitements. (Voir SchistoSOPLAB01)

Durant cette visite, médicament concomitants, la tolérance aux traitement à l'étude sera, ainsi que les symptômes de Schistosomiase et les épisodes de paludisme éventuellement survenues seront également évaluées.

#### 4.10.1. Suivi Médicaments (Bras AM et PZQ)

- **L'infirmier** vérifie si l'enfant a pris un médicament antipaludéen ou le PZQ.
- Il vérifie aussi s'il a pris des autres médicaments.
- Pour *chaque* nouveau traitement pris (aussi pour le PZQ et les ACT), le eCRF « **Médicaments** » doit être rempli.

#### 4.10.2. Suivi symptômes (Bras AM seulement)

- **L'infirmier** prendra la température avec un thermomètre tympanique. Afin d'obtenir une bonne lecture, il suivra les instructions suivantes :
  - Retirez le thermomètre du socle. Appuyez sur le bouton Marche/arrêt. Pendant un autocontrôle interne, tous les voyants s'affichent à l'écran. La dernière température prise s'affiche ensuite pendant 5 secondes.
  - L'indicateur d'embout jetable clignote pour signaler qu'un embout jetable est nécessaire. Fixez un embout jetable en poussant la sonde du thermomètre directement dans l'embout jetable à l'intérieur de la boîte, puis en la ressortant.  
*Remarque* : Le thermomètre ThermoScan Braun ne fonctionne pas tant qu'il ne comporte pas d'embout jetable.
  - Pour obtenir des mesures précises, assurez-vous que l'embout jetable est propre, avant chaque relevé de température. Sinon, nettoyez-le. En cas de besoin appuyez sur le bouton Eject pour retirer et jeter l'embout jetable utilisé et installez-en un nouveau et propre.
  - Sélectionnez l'âge à l'aide du bouton Age Precision™. Appuyez sur le bouton pour passer d'un groupe d'âge à l'autre. ThermoScan affiche par défaut la dernière tranche d'âge utilisée si vous ne la modifiez pas

## Schisto/SOP/CLIN/01



- Ajustez bien la sonde dans le conduit auditif, puis poussez et relâchez le bouton Start. Le voyant lumineux ExacTemp clignote pendant la prise de température. Si la sonde a été correctement introduite dans le conduit auditif pendant la mesure, un long bip signale la fin de la mesure. Le résultat s'affiche à l'écran



Si une fièvre (> 38°C) est observée, il s'agit d'un événement indésirable.

Voir le « SchistoSOPCLIN02-PRISE EN CHARGE RAPPORT EI » pour prise en charge.

- **L'infirmier** parcourt la liste des symptômes potentiels avec l'enfant. Pour chaque **symptôme** rapporté, **l'infirmier** indiquera l'intensité– « Léger », « Modéré » ou « Sévère » – en fonction du ressenti du participant, si un contact avec le personnel médical (autre que celui de l'étude) a été fait et si le symptôme est encore présent au jour de la visite.
- L'intensité est en générale définis comme suit :
  - Léger : le symptôme n'interfère pas avec les activités quotidiennes du participant.
  - Modéré : le symptôme se traduit par un faible niveau de désagrément. Il peut causer une certaine interférence avec les activités quotidiennes.
  - Sévère : le symptôme interrompt/perturbe l'activité quotidienne habituelle du participant. Un symptôme sévère est habituellement incapacitant.
- Pour certains symptômes indiqués dans l'eCRF, la gradation spécifique suivante peut être utilisée :
  - Sang dans les selles
    - Léger : Traces de sang non mélangé avec les selles
    - Modéré : Sang mélangé avec les selles.
    - Sévère : Diarrhée sanguinolente ou de couleur rouge ou noire.
  - Hématurie
    - Léger : Urine de couleur rose à rouge clair.
    - Modéré : Urine rouge foncé ou présence de petits caillots de sang.
    - Sévère : Gros caillots de sang, difficulté et douleurs pour uriner.



## Schisto/SOP/CLIN/01

- Eruption cutanée

Léger : Rougeur ou démangeaisons de la peau sur une partie ou la totalité du corps

Modéré : Eruption papulo-nodulaire ou desquamation légère ou petites plaies.

Sévère : Ampoules/phlyctènes, ulcères ouverts, desquamation humide, éruption cutanée grave sur de grandes surfaces.

En cas de symptômes légers en cours, l'infirmier peut traiter les symptômes en utilisant la pharmacie à disposition (après avis médical par téléphone si nécessaire).

En cas de symptômes d'intensité modérée ou sévère, il s'agit d'un événement indésirable. L'infirmier indique sur le « Journal d'activités » les observations éventuels et qu'il y a un EI à rapporter. Voir le « SchistoSOPCLIN02-PRISE EN CHARGE RAPPORT EI » pour prise en charge.

### 4.10.3. Détection paludisme (Bras AM et PZQ)

- L'infirmier demande l'enfant spécifiquement si un diagnostic de paludisme a été fait depuis la dernière visite.

Si oui, l'infirmier vérifie la date et le lieu du diagnostic. Il s'agit de paludisme clinique. Voir le « SchistoSOPCLIN02-PRISE EN CHARGE RAPPORT EI » pour prise en charge.



**Schisto/SOP/CLIN/01**

#### 4.11. Visite d'évaluation INTERMEDIAIRE de l'efficacité clinique (semaine 24) (bras AM et PZQ)

Deux **infirmiers** travailleront avec deux **médecins** pendant deux jours consécutifs pour évaluer les enfants selon le bras d'étude. **L'infirmier** appellera les participants un par un en fonction de la liste établie préalablement. Sur cette liste il indiquera la présence ou absence de l'enfant.

**L'infirmier** appellera les participants un par un en fonction de la liste établie préalablement. Sur la base du numéro d'identification, il sélectionnera le fichier correspondant sur l'iPad.

Cette visite est aussi destinée à la collecte des urines et des selles pour l'évaluation de l'efficacité parasitologique des traitements. (Voir SchistoSOPLAB01)

##### 4.11.1. Evaluation médicale

- **L'infirmier** pèsera et mesurera l'enfant à l'aide de la balance et de la toise (l'enfant doit enlever ses chaussures).
- **Le médecin** notera le poids et la taille dans l'eCRF « **Evaluation médicale** » ; le programme donnera automatiquement l'index de masse corporelle (IMC), selon la formule poids (kg)/taille (m) x taille (m).
  - *Un IMC inférieur à 3 déviation standard (DS) indique une malnutrition sévère; l'enfant doit être référé au poste de santé pour les soins nécessaires (avec instructions écrites du médecin).* Le tableau ci-dessous résume ces IMC.

**IMC pour âge et sexe basé sur les données de l'OMS (z-scores)**

| Age | Fille | Garçon |
|-----|-------|--------|
|     | -3DS  | -3DS   |
| 6   | 11.7  | 12.2   |
| 7   | 11.8  | 12.3   |
| 8   | 12.0  | 12.5   |
| 9   | 12.2  | 12.7   |
| 10  | 12.5  | 12.9   |
| 11  | 12.9  | 13.2   |
| 12  | 13.4  | 13.6   |
| 13  | 13.8  | 14     |
| 14  | 14.2  | 14.5   |

*IMC = Indice de masse corporelle, OMS = Organisation Mondiale de la Santé, DS = déviation standard*

- **Le médecin** examinera l'enfant, en particulier la région abdominale. Il enregistrera dans l'eCRF « **Evaluation médicale** » de façon systématique les éléments suivants : absence/présence de (1)



## Schisto/SOP/CLIN/01

extension du foie en dessous du gril costal de plus de 2 cm; (2) élargissement de la rate; (3) ascite ; (4) circulation collatérale péri-ombilicale ; (5) toute autre signe clinique de maladie grave.

- Si une ascite et/ ou une circulation collatérale ou tout autre signe de maladie grave sont observés, l'enfant doit être référé au poste de santé/hôpital pour les soins nécessaires (avec instructions écrites du **médecin**).
- **L'infirmier** prélèvera une goutte de sang au doigt de l'enfant (après désinfection) avec une aiguille rétractable et effectuera la mesure du taux d'hémoglobine avec l'appareil HemoCue (Voir Scisto/SOP/LAB/02). Au cours du prélèvement de sang pour l'évaluation de la concentration en Hémoglobine, appliquez de nouveau une légère pression vers le bout du doigt jusqu'à ce qu'une autre goutte de sang apparaisse et déposez 4 gouttes de sang séparément sur le papier filtre. Découper le papier filtre pour séparer la partie qui restera à l'IRESEF de celle qui sera envoyée à l'ITM. (voir Schisto/SOP/LAB/08).
- **Le médecin** notera le résultat obtenu (taux d'hémoglobine) dans l'eCRF « **Evaluation médicale** »
  - Si le taux d'hémoglobine est inférieur à 7 g/dl, l'enfant doit être référé au poste de santé pour les soins nécessaires (avec instructions écrites du **médecin**).

### 4.11.2. Suivi Médicaments

- **L'infirmier** vérifie si l'enfant a pris un médicament antipaludéen ou le PZQ.
- Il vérifie aussi s'il a pris des autres médicaments.
- Pour chaque nouveau traitement pris (aussi pour le PZQ et les ACT), le eCRF « **Médicaments** » doit être rempli.

### 4.11.3. Suivi symptômes

- **L'infirmier** prendra la température avec un thermomètre tympanique. Afin d'obtenir une bonne lecture, il suivra les instructions suivantes :
  - Retirez le thermomètre du socle. Appuyez sur le bouton Marche/arrêt. Pendant un autocontrôle interne, tous les voyants s'affichent à l'écran. La dernière température prise s'affiche ensuite pendant 5 secondes.
  - L'indicateur d'embout jetable clignote pour signaler qu'un embout jetable est nécessaire. Fixez un embout jetable en poussant la sonde du thermomètre directement dans l'embout jetable à l'intérieur de la boîte, puis en la ressortant.  
Remarque : Le thermomètre ThermoScan Braun ne fonctionne pas tant qu'il ne comporte pas d'embout jetable.
  - Pour obtenir des mesures précises, assurez-vous que l'embout jetable est propre, avant chaque relevé de température. Sinon, nettoyez-le. En cas de besoin appuyez sur le bouton Eject pour retirer et jeter l'embout jetable utilisé et installez-en un nouveau et propre.
  - Sélectionnez l'âge à l'aide du bouton Age Precision™. Appuyez sur le bouton pour passer d'un groupe d'âge à l'autre. ThermoScan affiche par défaut la dernière tranche d'âge utilisée si vous ne la modifiez pas

## Schisto/SOP/CLIN/01

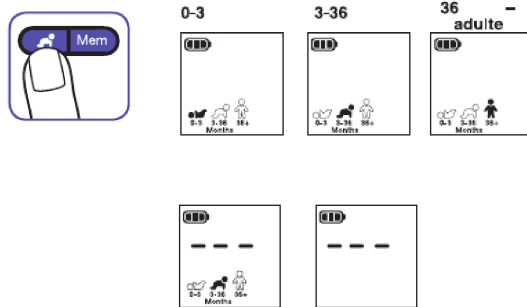

- Ajustez bien la sonde dans le conduit auditif, puis poussez et relâchez le bouton Start. Le voyant lumineux ExacTemp clignote pendant la prise de température. Si la sonde a été correctement introduite dans le conduit auditif pendant la mesure, un long bip signale la fin de la mesure. Le résultat s'affiche à l'écran

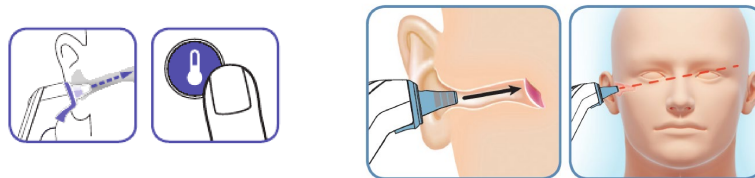

Si une fièvre (> 38°C) est observée, le médecin doit évaluer l'enfant. Ce dernier le réfèrera au poste de santé avec des instructions écrites.

- **L'infirmier** parcourt la liste des symptômes potentiels avec l'enfant. Pour chaque **symptôme** rapporté, l'infirmier indiquera l'intensité – « Léger », « Modéré » ou « Sévère » – en fonction du ressenti du participant, si un contact avec le personnel médical (autre que celui de l'étude) a été fait et si le symptôme est encore présent au jour de la visite.
- L'intensité est en générale définis comme suit :
  - **Léger** : le symptôme n'interfère pas avec les activités quotidiennes du participant.
  - **Modéré** : le symptôme se traduit par un faible niveau de désagrément. Il peut causer une certaine interférence avec les activités quotidiennes.
  - **Sévère** : le symptôme interrompt/perturbe l'activité quotidienne habituelle du participant. Un symptôme sévère est habituellement incapacitant.
- Pour certains symptômes indiqués dans l'eCRF, la gradation spécifique suivante peut être utilisée :
  - Sang dans les selles
    - Léger** : Traces de sang non mélangé avec les selles
    - Modéré** : Sang mélangé avec les selles.
    - Sévère** : Diarrhée sanguinolente ou de couleur rouge ou noire.
  - Hématurie
    - Léger** : Urine de couleur rose à rouge clair.
    - Modéré** : Urine rouge foncé ou présence de petits caillots de sang.
    - Sévère** : Gros caillots de sang, difficulté et douleurs pour uriner.
  - Eruption cutanée

## Schisto/SOP/CLIN/01



Léger : Rougeur ou démangeaisons de la peau sur une partie ou la totalité du corps  
Modéré : Eruption papulo-nodulaire ou desquamation légère ou petites plaies.  
Sévère : Ampoules/phlyctènes, ulcères ouverts, desquamation humide, éruption cutanée grave sur de grandes surfaces.

En cas de symptômes légers en cours, l'infirmier peut traiter les symptômes en utilisant la pharmacie à disposition.

- En cas de symptômes d'intensité modérée ou sévère en cours, le médecin doit évaluer l'enfant. Si nécessaire, Il référera l'enfant au poste de santé avec des instruction écrites précises pour examens complémentaires (paludisme,...) et traitement.

### 4.11.4. Détection paludisme

- L'infirmier demande l'enfant spécifiquement si un diagnostic de paludisme a été fait depuis la dernière visite.

Si oui, l'infirmier vérifie la date et le lieu du diagnostic. Il s'agit de paludisme clinique. Voir le « SchistoSOPCLIN02-PRISE EN CHARGE RAPPORT EI » pour prise en charge.

NB : Dans les jours qui suivent l'évaluation intermédiaire tous les enfants inclus bénéficieront de l'examen échographique abdominal initial par des radiologues expérimentés selon un programme établi à part. L'examen échographique sera effectué conformément aux directives de l'OMS et les observations seront noté dans le « SchistoFORM\_Echographie ».

Les résultats seront ensuite transcrits dans le eCRF « **Echographie** » par la personne responsable de la saisie des données.

## Schisto/SOP/CLIN/01



## 4.12. Visite d'évaluation FINALE de l'efficacité clinique (semaine 48) (bras AM et PZQ)

Deux **infirmiers** travailleront avec deux **médecins** pendant deux jours consécutifs pour évaluer les enfants selon le bras d'étude. **L'infirmier** appellera les participants un par un en fonction de la liste établie préalablement. Sur cette liste il indiquera la présence ou absence de l'enfant.

**L'infirmier** appellera les participants un par un en fonction de la liste établie préalablement. Sur la base du numéro d'identification, il sélectionnera le fichier correspondant sur l'iPad.

Cette visite est aussi destinée à la collecte des urines et des selles pour l'évaluation de l'efficacité parasitologique des traitements. (Voir SchistoSOPLAB01)

## 4.12.1. Evaluation médicale

- **L'infirmier** pèsera et mesurera l'enfant à l'aide de la balance et de la toise (l'enfant doit enlever ses chaussures).
- **Le médecin** notera le poids et la taille dans l'eCRF « **Evaluation médicale** » ; le programme donnera automatiquement l'index de masse corporelle (IMC), selon la formule poids (kg)/taille (m) x taille (m).
  - Un IMC inférieur à 3 déviation standard (DS) indique une malnutrition sévère; l'enfant doit être référé au poste de santé pour les soins nécessaires (avec instructions écrites du médecin). Le tableau ci-dessous résume ces IMC.

**IMC pour âge et sexe basé sur les données de l'OMS (z-scores)**

| Age | Fille | Garçon |
|-----|-------|--------|
|     | -3DS  | -3DS   |
| 6   | 11.7  | 12.2   |
| 7   | 11.8  | 12.3   |
| 8   | 12.0  | 12.5   |
| 9   | 12.2  | 12.7   |
| 10  | 12.5  | 12.9   |
| 11  | 12.9  | 13.2   |
| 12  | 13.4  | 13.6   |
| 13  | 13.8  | 14     |
| 14  | 14.2  | 14.5   |

IMC = Indice de masse corporelle, OMS = Organisation Mondiale de la Santé, DS = déviation standard

- **Le médecin** examinera l'enfant, en particulier la région abdominale. Il enregistrera dans l'eCRF « **Evaluation médicale** » de façon systématique les éléments suivants : absence/présence de (1) extension du foie en dessous du gril costal de plus de 2 cm; (2) élargissement de la rate; (3) ascite ; (4) circulation collatérale péri-ombilicale ; (5) toute autre signe clinique de maladie grave.

## Schisto/SOP/CLIN/01



- Si une ascite et/ ou une circulation collatérale ou tout autre signe de maladie grave sont observés, l'enfant doit être référé au poste de santé/hôpital pour les soins nécessaires (avec instructions écrites du médecin).
- **L'infirmier** prélèvera une goutte de sang au doigt de l'enfant (après désinfection) avec une aiguille rétractable et effectuera la mesure du taux d'hémoglobine avec l'appareil HemoCue (Voir Scisto/SOP/LAB/02). Au cours du prélèvement de sang pour l'évaluation de la concentration en Hémoglobine, appliquez de nouveau une légère pression vers le bout du doigt jusqu'à ce qu'une autre goutte de sang apparaisse et déposez 4 gouttes de sang séparément sur le papier filtre. Découper le papier filtre pour séparer la partie qui restera à l'IRESSEF de celle qui sera envoyée à l'ITM. (voir Schisto/SOP/LAB/08).
- **Le médecin** notera le résultat obtenu (taux d'hémoglobine) dans l'eCRF « **Evaluation médicale** »
  - Si le taux d'hémoglobine est inférieur à 7 g/dl, l'enfant doit être référé au poste de santé pour les soins nécessaires (avec instructions écrites du médecin).

## 4.12.2. Suivi Médicaments

- **L'infirmier** vérifie si l'enfant a pris un médicament antipaludéen ou le PZQ.
- Il vérifie aussi s'il a pris des autres médicaments.
- Pour chaque nouveau traitement pris (aussi pour le PZQ et les ACT), le eCRF « **Médicaments** » doit être rempli.

## 4.12.3. Suivi symptômes

- **L'infirmier** prendra la température avec un thermomètre tympanique. Afin d'obtenir une bonne lecture, il suivra les instructions suivantes :
  - Retirez le thermomètre du socle. Appuyez sur le bouton Marche/arrêt. Pendant un autocontrôle interne, tous les voyants s'affichent à l'écran. La dernière température prise s'affiche ensuite pendant 5 secondes.
  - L'indicateur d'embout jetable clignote pour signaler qu'un embout jetable est nécessaire. Fixez un embout jetable en poussant la sonde du thermomètre directement dans l'embout jetable à l'intérieur de la boîte, puis en la ressortant.  
*Remarque* : Le thermomètre ThermoScan Braun ne fonctionne pas tant qu'il ne comporte pas d'embout jetable.
  - Pour obtenir des mesures précises, assurez-vous que l'embout jetable est propre, avant chaque relevé de température. Sinon, nettoyez-le. En cas de besoin appuyez sur le bouton Eject pour retirer et jeter l'embout jetable utilisé et installez-en un nouveau et propre.
  - Sélectionnez l'âge à l'aide du bouton Age Precision™. Appuyez sur le bouton pour passer d'un groupe d'âge à l'autre. ThermoScan affiche par défaut la dernière tranche d'âge utilisée si vous ne la modifiez pas

## Schisto/SOP/CLIN/01



- Ajustez bien la sonde dans le conduit auditif, puis poussez et relâchez le bouton Start. Le voyant lumineux ExacTemp clignote pendant la prise de température. Si la sonde a été correctement introduite dans le conduit auditif pendant la mesure, un long bip signale la fin de la mesure. Le résultat s'affiche à l'écran



Si une fièvre (> 38°C) est observée, le médecin doit évaluer l'enfant. Ce dernier le réfèrera au poste de santé avec des instructions écrites.

- **L'infirmier** parcourt la liste des symptômes potentiels avec l'enfant. Pour chaque **symptôme** rapporté, l'**infirmier** indiquera l'intensité– « Léger », « Modéré » ou « Sévère » – en fonction du ressenti du participant, si un contact avec le personnel médical (autre que celui de l'étude) a été fait et si le symptôme est encore présent au jour de la visite.
- L'intensité est en générale définis comme suit :
  - **Léger** : le symptôme n'interfère pas avec les activités quotidiennes du participant.
  - **Modéré** : le symptôme se traduit par un faible niveau de désagrément. Il peut causer une certaine interférence avec les activités quotidiennes.
  - **Sévère** : le symptôme interrompt/perturbe l'activité quotidienne habituelle du participant. Un symptôme sévère est habituellement incapacitant.
- Pour certains symptômes indiqués dans l'eCRF, la gradation spécifique suivante peut être utilisée :
  - Sang dans les selles
    - Léger** : Traces de sang non mélangé avec les selles
    - Modéré** : Sang mélangé avec les selles.
    - Sévère** : Diarrhée sanguinolente ou de couleur rouge ou noire.
  - Hématurie
    - Léger** : Urine de couleur rose à rouge clair.
    - Modéré** : Urine rouge foncé ou présence de petits caillots de sang.
    - Sévère** : Gros caillots de sang, difficulté et douleurs pour uriner.
  - Eruption cutanée

## Schisto/SOP/CLIN/01



Léger : Rougeur ou démangeaisons de la peau sur une partie ou la totalité du corps  
Modéré : Eruption papulo-nodulaire ou desquamation légère ou petites plaies.  
Sévère : Ampoules/phlyctènes, ulcères ouverts, desquamation humide, éruption cutanée grave sur de grandes surfaces.

En cas de symptômes légers en cours, l'infirmier peut traiter les symptômes en utilisant la pharmacie à disposition.

- En cas de symptômes d'intensité modérée ou sévère en cours, le médecin doit évaluer l'enfant. Il réfèrera l'enfant au poste de santé avec des instruction écrites précises pour examens complémentaires (paludisme,...) et traitement si nécessaire.

### 4.12.4. Traitement étude

L'infirmier enregistrera la prise de PZQ chez tous les enfants (date de prise, dosage, numéro de lot et date d'expiration) dans l'eCRF « Traitement à l'étude ».

### 4.12.4. Détection paludisme

- L'infirmier demande l'enfant spécifiquement si un diagnostic de paludisme a été fait depuis la dernière visite.

Si oui, l'infirmier vérifie la date et le lieu du diagnostic. Il s'agit de paludisme clinique. Voir le « SchistoSOPCLIN02-PRISE EN CHARGE RAPPORT EI » pour prise en charge.

NB : Dans les jours qui suivent l'évaluation finale tous les enfants inclus bénéficieront de l'examen échographique abdominal initial par des radiologues expérimentés selon un programme établi à part. L'examen échographique sera effectué conformément aux directives de l'OMS et les observations seront noté dans le « SchistoFORM\_Echographie ».

Les résultats seront ensuite transcrits dans le eCRF « **Echographie** » par la personne responsable de la saisie des données.



Schisto/SOP/CLIN/01

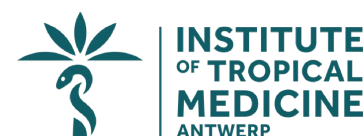

## 5. Registres et archives

| Annexes et Fiches à remplir |        |                                                             |
|-----------------------------|--------|-------------------------------------------------------------|
| Document                    | Nombre | Titre                                                       |
| CRF                         | 1      | Consentement éclairé / Données démographiquesdémographiques |
|                             | 4      | Echographie                                                 |
|                             | 99     | Eligibilité                                                 |
|                             | 1010   | Suivi médicaments                                           |
|                             | 111    | Suivi symptômes                                             |
|                             | 122    | Traitement de l'étude                                       |
|                             | 133    | Détection de paludisme                                      |
|                             | 144    | Paludisme cliniqueclinique                                  |
|                             | 155    | Evénements indésirables                                     |
|                             | 166    | MédicamentsMédicaments                                      |
|                             | 177    | Fin de l'étude                                              |
| FORM                        |        | Echographie                                                 |

| Révision    |                   |
|-------------|-------------------|
| Version 1.0 | Version Initiale  |
| Version 2.0 | Révision complète |

| Nom et fonction          | Date | Signature |
|--------------------------|------|-----------|
| <i>Auteur</i>            |      |           |
| <i>Brosius Isabel</i>    |      |           |
| <i>Révisé par</i>        |      |           |
| <i>Bottieu Emmanuel</i>  |      |           |
| <i>Annelies De Hondt</i> |      |           |
