# Supplementary material for: Evaluation of Artesunate-mefloquine as a Novel Alternative Treatment for Schistosomiasis in African Children (SchistoSAM): protocol of a proof-of-concept, open-label, two-arm, individually-randomised controlled trial
Source: HighWire-hosted journal article supplement (doi:10.1136/bmjopen-2020-047147), 2021-06-01
Supplement: bmjopen-2020-047147supp002_data_supplement.pdf [file bmjopen-2020-047147supp002_data_supplement.pdf]

Schisto/SOP/CLIN/02

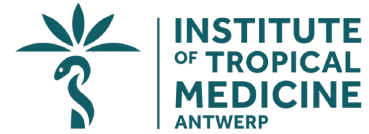

## Additional file 1

**Evaluation de l'artésunate-méfloquine comme traitement alternatif de la schistosomiase chez les enfants d'âge scolaire au Sénégal (SchistoSAM)**

**Titre:** SOP sur la collecte et le rapport des événements indésirables et des événements indésirables graves dans l'étude SchistoSAM  
**Numéro:** Schisto/SOP/CLIN/02  
**Version :** 2.0  
**Date :** 20/jav/2020

**1. Domaine et application**

L'étude SchistoSAM a pour but d'évaluer l'efficacité parasitologique et clinique ainsi que la tolérance de l'artésunate-méfloquine (AM), en comparaison au praziquantel (PZQ), dans le traitement des enfants Sénégalais en âge scolaire atteints de schistosomiase. L'étude évaluera aussi des nouveaux outils biologiques pour suivre l'efficacité du traitement.

Ce SOP s'adresse en particulier aux **médecins** et **infirmiers** de l'équipe locale d'étude, qui auront la responsabilité d'évaluer cliniquement les enfants et de suivre et prendre en charge les éventuels événements indésirables (EI) liés au traitement, soit lors des visites prévues par l'équipe d'étude, soit lors de visites imprévues au poste de santé.

Le but de cette SOP est de garantir que la prise en charge clinique et le rapport des événements indésirables (graves) soit fait correctement et comme décrit dans le protocole.

**2. Responsabilités**

| Fonction                                                           | Activités                                                                                                                                                                                                                                                                                                                                                                                                                                                                                                                                                                                                                                                                                                                                                                                                                                                                                                           |
|--------------------------------------------------------------------|---------------------------------------------------------------------------------------------------------------------------------------------------------------------------------------------------------------------------------------------------------------------------------------------------------------------------------------------------------------------------------------------------------------------------------------------------------------------------------------------------------------------------------------------------------------------------------------------------------------------------------------------------------------------------------------------------------------------------------------------------------------------------------------------------------------------------------------------------------------------------------------------------------------------|
| <i>Investigateur Principal et co-investigateur médical du Pays</i> | <ul style="list-style-type: none"> <li>▪ Organisation, avec l'intervention de la co-investigatrice médicale et du coordinateur IMT, de la <b>formation</b> des <b>médecins</b> et <b>infirmiers</b> de l'équipe locale d'étude, pour permettre la bonne application de ce SOP (compréhension de la prise en charge/rapport des événements indésirables (EI) liés aux traitements)</li> <li>▪ <b>Supervision et coaching</b> au cours de l'étude des <b>médecins</b> et <b>infirmiers</b> de l'équipe locale d'étude, avec l'appui de l'équipe IMT, quant à la conformité des actions et décisions avec ce SOP</li> <li>▪ <b>Surveillance, vérification et envoi rapide des rapports des EIG</b> selon la procédure décrite dans ce SOP aux autorités sanitaires sénégalaises et au comité de surveillance indépendant (CSI) en Belgique, ainsi qu'au coordinateur et à la co-investigatrice médicale IMT</li> </ul> |

## Schisto/SOP/CLIN/02

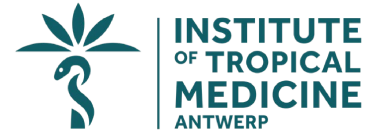

|                                                       |                                                                                                                                                                                                                                                                                                                                                                                                                                                                                                                                                                                                                                                                                                                                                                                                                                                                                                                                                                                                                                                                                                                                                                                                                                                                                                                                                                                                                                                                                                                                                                                                                                                                                                                                                                            |
|-------------------------------------------------------|----------------------------------------------------------------------------------------------------------------------------------------------------------------------------------------------------------------------------------------------------------------------------------------------------------------------------------------------------------------------------------------------------------------------------------------------------------------------------------------------------------------------------------------------------------------------------------------------------------------------------------------------------------------------------------------------------------------------------------------------------------------------------------------------------------------------------------------------------------------------------------------------------------------------------------------------------------------------------------------------------------------------------------------------------------------------------------------------------------------------------------------------------------------------------------------------------------------------------------------------------------------------------------------------------------------------------------------------------------------------------------------------------------------------------------------------------------------------------------------------------------------------------------------------------------------------------------------------------------------------------------------------------------------------------------------------------------------------------------------------------------------------------|
| <p><b>Médecin(s)</b> de l'équipe locale d'étude</p>   | <ul style="list-style-type: none"> <li>▪ <b>Information des participants/parents</b> sur la prise en charge et le rapport des événements indésirables.</li> <li>▪ <b>Identification, collecte et caractérisation</b> des événements indésirables (EI) lors de l'administration des médicaments et des visites de suivi.</li> <li>▪ <b>Rapport rétrospective</b> des EI non actives sur base des notes de l'<b>infirmiers</b> dans le journal d'activité et les données de l'eCRF « Suivi symptômes ». Si des renseignements supplémentaires sont nécessaires pour l'évaluation de l'EI, le <b>médecin</b> doit contacter le participant en question au plus tard le jour suivant.</li> <li>▪ Décision de l'<b>instauration des traitements AM successifs</b> et de l'éventuel arrêt à cause d'événement indésirables graves (EIG)</li> <li>▪ <b>Prise en charge</b> sur les sites d'étude ou par téléphone des EI, ainsi qu'à l'hôpital de Richard-Toll en cas d'EIG nécessitant une admission; suivi du patient jusqu'à la résolution complète du problème</li> <li>▪ <b>Contact</b> les centres de santé chaque semaine pour leur demander si des participants à l'étude sont venus pour des consultations et si des événements (indésirables ?) doivent être signalés.</li> <li>▪ <b>Coordination</b> avec les agents de santé des villages visités en cas d'EI survenant en dehors des visites d'étude (visite imprévue); instructions précises sur la marche à suivre.</li> <li>▪ <b>Rapport rapide, sans délai, des EIG</b> à l'investigateur principal et au co-investigateur médical du pays, avec copie systématique au coordinateur et à la co-investigatrice médicale IMT; rapport complet de l'évolution jusqu'à la résolution complète du problème</li> </ul> |
| <p><b>Infirmier(s)</b> de l'équipe locale d'étude</p> | <ul style="list-style-type: none"> <li>▪ <b>Appui</b> au(x) <b>médecin(s)</b> dans l'évaluation médicale initiale, intermédiaire et finale</li> <li>▪ <b>Collecte</b> systématique des EI actives, lors des visites d'administration des traitements, et des EI éventuellement survenus depuis la dernière visite lors des visites de suivi (Jour 7 après chaque traitement) et des visites d'évaluation parasitologique (semaines 4, 10 et 16), dans le cadre de la surveillance active.</li> <li>▪ <b>Référence</b> immédiate du participant au <b>médecin</b> ou <b>contact téléphonique</b> en cas de symptômes modérés ou sévère <i>actives</i>, selon le type de visite et la disponibilité du <b>médecin</b> sur place.</li> <li>▪ <b>Rapport</b> des symptômes modérés ou sévères <i>non active</i>, dans le journal d'activité, afin de</li> <li>▪ <b>Traitement</b> symptomatique, sous supervision du <b>médecin</b> de l'étude.</li> </ul>                                                                                                                                                                                                                                                                                                                                                                                                                                                                                                                                                                                                                                                                                                                                                                                                                     |
| <p><i>Relais communautaires</i></p>                   | <ul style="list-style-type: none"> <li>▪ Appel et regroupement des participants les jours des visites d'étude.</li> <li>▪ Support aux différentes activités logistiques connexes à l'étude sur le terrain.</li> </ul>                                                                                                                                                                                                                                                                                                                                                                                                                                                                                                                                                                                                                                                                                                                                                                                                                                                                                                                                                                                                                                                                                                                                                                                                                                                                                                                                                                                                                                                                                                                                                      |

Schisto/SOP/CLIN/02



### 3. Définitions des événements indésirables et classification

#### 3.1. Définitions

##### 3.1.1. Événement indésirable (EI)

En principe, un événement indésirable (EI) est TOUT événement médical indésirable survenu chez un participant à une étude clinique auquel on a administré un produit pharmaceutique. L'événement n'a donc pas besoin d'être lié au médicament à l'étude.

Dans cette étude, un certain nombre de symptômes seront systématiquement enregistré et classé en intensité (léger, modéré, sévère au moyen de définitions préétablie, voir le Schisto/SOP/CLIN/01). Seulement les symptômes d'intensité modéré ou sévère seront rapportés comme EI, à partir du premier administration du traitement (jour 0) jusqu'au 28<sup>ième</sup> jour après chaque administration du médicament à l'étude.

**ATTENTION** : Des symptômes qui étaient déjà présents avant l'administration du médicament à l'étude, mais qui ont augmenté en intensité, doivent aussi être considérés comme des événements indésirables et doivent donc être déclarés.

##### 3.1.2. Événement indésirable grave (EIG)

On appelle un EI un événement indésirable grave (EIG) si l'EI entraîne l'un ou l'autre des **résultats** suivants:

- Décès;
- Menace pour la vie;
- Nécessitant une hospitalisation ou la prolongation d'une hospitalisation existante;
- Provoquant une anomalie ou une malformation congénitale;
- Entraînant une invalidité ou une incapacité persistante ou importante;
- Un événement médical important qui peut ne pas entraîner la mort, ni mettre la vie en danger ou nécessiter une hospitalisation peut être considéré comme une EIG, lorsque, selon un jugement médical approprié, l'événement peut mettre en danger le participant et peut nécessiter une intervention médicale ou chirurgicale pour prévenir un des résultats énumérés dans cette définition.

#### 3.2. Classification

Pour chaque événement indésirable, **le médecin** de l'étude indiquera les renseignements suivants:

##### 3.2.1. Évaluation de la gravité

La gravité d'un événement est basée sur les résultats du patient ou les critères d'action habituellement associés aux événements qui représentent une menace pour la vie ou le fonctionnement du patient. La gravité (et non la sévérité) sert de guide pour définir les obligations en matière de rapports réglementaires.

*Attention : la définition d'EIG est très précise et correspond aux critères - décrit sous « Définitions » - reconnus internationalement dans tous les essais cliniques. La notion de sévérité (voir ci-dessous) est un peu différente et est attribuée par l'investigateur clinique selon des critères plus subjectifs. Un événement indésirable peut être « sévère » sans être « grave » (e.g.*

## Schisto/SOP/CLIN/02



*des fortes céphalées qui empêchent quelqu'un d'aller à l'école), ou être « grave » sans être « sévère » (une fracture du bras qui entraîne une hospitalisation).*

### 3.2.2. Évaluation de la sévérité

La sévérité d'un EI est un point sur une échelle d'intensité arbitraire de l'événement indésirable en question. Un événement peut être sévère sans être grave. (e.g. de terribles céphalées qui ont empêché le participant d'aller à l'école)

Léger : les événements nécessitent peu ou pas de traitement et n'interfèrent pas avec les activités quotidiennes du participant.

Modéré : les événements se traduisent par un faible niveau d'inconvénient ou de préoccupation à l'égard des mesures thérapeutiques. Des événements modérés peuvent causer une certaine interférence avec les activités quotidiennes.

Sévères : les événements interrompent l'activité quotidienne habituelle d'un participant et peuvent nécessiter une pharmacothérapie systémique ou un autre traitement. Les événements sévères sont habituellement incapacitants.

Dangereux pour la vie : Participant au risque de décès au moment de l'événement

*Attention : La notion de sévérité selon les définitions de « Bonnes Pratiques Cliniques » (GCP) est un peu différente de celle de l'intensité des symptômes, comme enregistré dans le eCRF « Suivi symptômes ».*

*L'évaluation de la sévérité est toujours faite par un **médecin**, tandis que l'intensité des symptômes est une mesure permettant de quantifier la perception subjective du patient. Pour certains symptômes indiqués dans l'eCRF, l'intensité est définie plus spécifiquement. Voir le SOP « Schisto/SOP/CLIN/01 » pour plus de détails sur la classification de l'intensité des symptômes*

### 3.2.3. Évaluation de la causalité

**Le médecin** d'étude doit dans la mesure du possible établir la relation entre le médicament (en l'occurrence AM) et la survenue de chaque EI.

Aucun lien : Réserve aux événements qui ne peuvent pas être liés de près ou de loin à la participation à l'étude.

Lien peu probable : Il n'y a pas d'association temporelle raisonnable entre le médicament à l'étude et l'EI et l'événement pourrait avoir été produit par l'état clinique du participant ou d'autres modes de traitement administrés au participant.

Lien possible : L'EI suspecté peut suivre ou non une séquence temporelle raisonnable à partir de l'administration du médicament, mais la relation ne peut être écartée comme étant improbable. L'événement pourrait toutefois aussi avoir été produit ou mimé par l'état clinique du participant ou par d'autres thérapies administrées simultanées.

Lien probable : L'EI suspecté suit une séquence temporelle raisonnable à partir de l'administration du médicament à l'étude, diminue après l'arrêt du traitement et ne peut être raisonnablement expliqué par les caractéristiques connues de l'état clinique du participant.

## Schisto/SOP/CLIN/02



**Définitivement lié** : Réserve aux événements qui ne présente aucun doute quant à leur relation avec l'administration du médicament : une nouvelle administration provoquerait à coup sûr le même événement.

### 3.2.4. Issue/résultat

**Récupéré** : Le participant s'est remis de l'événement sans problèmes résiduels.

**Pas encore récupéré** : Ce résultat ne peut être utilisé que pour les événements indésirables graves. L'événement ne répond plus à un critère "grave", mais l'événement médical n'est pas encore complètement guéri.

**Domages permanents** : L'événement a entraîné une déficience permanente.

**En cours** : L'événement se poursuit jusqu'à la fin de la période de suivi des événements indésirables

**Fatal** : Le participant est décédé.

**Inconnu** : Le participant ne peut être retrouvé et aucun résultat final n'a pu être déterminé pour l'événement.

## 4. Collecte et rapport des EI et EIG

Les EI sont recueillis jusqu'à 28 jours après chaque administration du médicament à l'étude. Ils seront soit détecté de manière **ACTIVE** durant les visites prévues, avec des questionnaires systématiques sur les symptômes éventuels de chaque enfant, soit de manière **PASSIVE**, lors d'un contact par le participant avec l'équipe d'étude ou lors d'une consultation au poste de santé pour un problème de santé.

Il peut s'agir alors soit d'une maladie intercurrente (en particulier les épisodes fébriles dus au paludisme seront recherchés), soit d'un effet secondaire lié à la prise d'un des deux traitements (en particulier, l'artésunate-méfloquine est un antipaludique très utilisé mais qui n'a pas encore été étudié dans le traitement de la schistosomiase).

Les **événements indésirables graves** (voir définitions) requièrent une attention particulière car ils nécessitent une prise en charge immédiate, l'exclusion de l'étude (arrêt du traitement d'étude) et un rapport immédiat aux responsables de l'étude.

### 4.1. Événements indésirables

#### 4.1.1. Visites d'étude prévues

EI peuvent être observée lors des visites prévues, soit lors de la saisie par l'infirmière du questionnaire systématique du eCRF "**Suivi symptômes**", soit lors de la période d'observation suivant la prise du médicament à l'étude. Les symptômes sont systématiquement demandé lors de chaque visite suivant l'administration initial du médicament à l'étude. Après chaque administration du médicament à l'étude, un temps d'observation de 2 heures est prévu, dans lequel l'équipe médical reste disponible dans le village.

1. Au cas où le **médecin** est présent sur place lors de la visite, tout enfant qui présente des symptômes modérés ou sévères ou qui montre des signes de maladie au cours de

## Schisto/SOP/CLIN/02

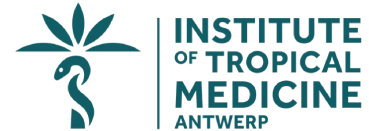

l'observation est référé au **médecin**. Ce dernier évalue l'enfant, il effectuera alors une évaluation gravité-sévérité-causalité-issu et il remplit l'eCRF « **Evénements indésirables** ».

2. Dans le cas où le **médecin** n'est pas présent, l'infirmière communiquera avec lui en cas de constatation d'un EI. Il y a deux scénarios possibles :
  - a. L'enfant présente des symptômes modérés ou sévères qui sont en cours le jour de la visite. Dans ce cas, l'infirmière communiquera immédiatement avec le **médecin** par téléphone et discutera de la nécessité et du moment d'une évaluation clinique ultérieure. L'infirmière note les détails nécessaires dans dans la liste journalière des participants à voir et crée déjà un nouvel épisode dans l'eCRF « **Evénements indésirables** ». Il y précise la date de début des plaintes.
  - b. L'enfant signale des plaintes modérées ou graves, qui sont survenues depuis la visite précédente, mais qui ne sont plus actives le jour même de la visite. L'infirmière note les détails nécessaires dans le journal des activités et crée déjà un nouvel épisode dans l'eCRF « **Evénements indésirables** ». Il y précise la date de début des plaintes. Un contact téléphonique immédiat n'est pas nécessaire.
  - c. La liste journalière des participants à voir, contient une colonne signalante un « Evénement indésirable en cours », qui aidera **l'infirmier** d'informer particulièrement auprès de l'évolution de l'événement en cours de suivi. Au cas que l'événement n'est plus active, il le précise sur sa liste. Le **médecin** mettra à jour l'eCRF et terminera l'épisode.

A la fin de chaque journée de visite, le **médecin** révise les fichiers des enfants auxquels un EI a été rapporté et complète les formulaires eCRF « **Evénements indésirables** ». Il vérifie si les plaintes ne dataient pas d'avant l'administration du médicament à l'étude. Dans ce cas, il vérifiera si l'intensité a augmenté. Sinon ils ne doivent pas être signalés. De plus, il vérifiera si les plaintes ne font pas partie d'un EI en cours de suivi. Si des renseignements supplémentaires sont nécessaires pour l'évaluation de l'EI, le **médecin** doit contacter le participant en question au plus tard le jour suivant.

Pour la prise en charge clinique, consulter la section 5.

### Actions spécifiques par visite

- *Visites d'administration initiale du médicament à l'étude – Jour 0*
  - Avant l'administration du médicament.
    - **L'infirmier** remplit l'eCRF « **Suivi symptômes** ». En cas des symptômes modérés ou sévère, ou en cas d'une fièvre, il réfère l'enfant au **médecin**.
    - Le **médecin** évalue l'enfant. Il ne rapporte PAS les symptômes comme EI.
  - Après l'administration du médicament.
    - **L'infirmier** observe l'enfant. En cas d'aggravation des symptômes ou signes de maladie, il réfère l'enfant au **médecin**.
    - Le **médecin** évalue l'enfant. Il décrit l'événement dans l'eCRF « **Evénements indésirables** ».
- *Tous les autres visites d'administration du médicament à l'étude*
  - Avant l'administration du médicament.
    - **L'infirmier** remplit l'eCRF « **Suivi symptômes** ». En cas des symptômes modérés ou sévère, ou en cas d'une fièvre il réfère l'enfant au **médecin**.

## Schisto/SOP/CLIN/02



- Le **médecin** évalue l'enfant. Il déclare les symptômes comme EI dans l'eCRF « **Événements indésirables** ».
- Après l'administration du médicament.
  - En cas des symptômes ou signes de maladie, le **médecin** évalue l'enfant. Il décrit l'événement dans l'eCRF « **Événements indésirables** ».
- *Visites de suivi (Jour 7)*
  - L'**infirmier** remplit l'eCRF « **Suivi symptômes** ».
    - En cas des symptômes modérés ou sévère en cours, ou en cas d'une fièvre en cours, il téléphone le **médecin** immédiatement pour évaluation de la prise en charge (voir 5.)
    - En cas des symptômes modérés ou sévères passés, un contact téléphonique immédiate n'est pas nécessaire.
  - L'**infirmier** note les détails nécessaires dans la liste journalière des participants à voir.
  - L'**infirmier** note la date de début des plaintes dans un nouvel épisode dans l'eCRF « **Événements indésirables** ».
  - Le **médecin** remplit le reste de l'eCRF « **Événements indésirables** » au plus tard le soir de la journée de visite.
- *Visite d'évaluation de l'efficacité parasitologique (Semaine 4, 10 et 16)*
  - L'**infirmier** remplit l'eCRF « **Suivi symptômes** ».
    - En cas des symptômes modérés ou sévère en cours, ou en cas d'une fièvre en cours, il téléphone le **médecin** immédiatement pour évaluation de la prise en charge (voir 5.)
    - En cas des symptômes modérés ou sévères passés, un contact téléphonique immédiate n'est pas nécessaire.
  - L'**infirmier** note les détails nécessaires dans la liste journalière des participants à voir.
  - L'**infirmier** note la date de début des plaintes dans un nouvel épisode dans l'eCRF « **Événements indésirables** ».
  - Le **médecin** remplit le reste de l'eCRF « **Événements indésirables** » au plus tard le soir de la journée de visite.

## 4.1.2. Visites imprévues

Les participants seront informés que le personnel de l'étude peut toujours être contacté en cas d'événements indésirables (le numéro de contact est mentionné dans la consentement éclairé) et qu'ils peuvent se rendre à tout moment au poste de santé du village où l'étude est conduite. En principe, la famille de l'enfant malade apportera au poste le consentement éclairé de l'étude.

Le personnel des centres de santé des villages d'étude sera informé de l'étude et sera instruit de communiquer par téléphone avec le **médecin** de l'étude à tout moment qu'un participant à l'étude y consulte. Il demanderont alors à chaque enfant du groupe d'âge de l'étude s'il participe à l'étude. Le **médecin** donnera des instructions pour la prise en charge clinique en fonction de ce qui est décrit ci-dessus. (voir 5.)

Un registre de consultation pour les participants de l'étude SchistoSAM sera mis en disponibilité dans chaque centre de santé. En utilisant ce registre, l'**infirmier** sera guidée dans l'enregistrement systématique des données importantes.

Sur la base des informations enregistrées, le **médecin** remplira ultérieurement l'eCRF "Événements indésirables". Tout événement qui mène un participant à consulter le centre de santé devra être

## Schisto/SOP/CLIN/02



déclaré. Dans tous les cas il évaluera et rapportera la gravité, la sévérité, la causalité et l'issue (voir définitions, point 3).

Toutefois, les centres de santé seront contactés par le **médecin** de l'étude, au moins chaque semaine pour demander si des événements doivent être signalés et de les tenir au courant de l'identification des participants à l'étude qui viendront pour des consultations.

Au cas de contact téléphonique par un des participants, le **médecin** peut donner des conseils par téléphone, évaluer le participant lui-même ou référer le participant au centre de santé ou à l'hôpital de Richard Toll selon son estimation de la sévérité des symptômes.

Si le participant peut être aidé par téléphone et l'EI a été consigné sur un CRF papier, l'information doit être transcrite dans le eCRF "Adverse Events" le plus tôt possible.

En cas de symptômes sévères, une évaluation clinique en vraie vie est souhaitable. L'eCRF « Événements indésirables » sera rempli soit au moment d'évaluation par le **médecin** d'étude, soit sur base du registre des consultations SchistoSAM, remplis par l'**infirmier** de centre de santé, soit sur la base du dossier du patient à l'hôpital de Richard Toll.

Lors de chaque contact prévu avec le participant suivant la survenue d'un EI, tous les EI non résolus seront réévalués et mis à jour dans la base de données de l'étude.

### Actions spécifiques par type de contact

---

- *Visite imprévue – consultation centre de santé, poste de santé, case de santé*
  - L'**infirmier** de centre de santé remplit le fiche « *Modèle de notes de consultation* » (voir Annexe)
  - Contact par téléphone avec le **médecin** d'étude.
  - Le **médecin** remplit l'eCRF « *Événements indésirables* » en temps réel ou ultérieurement sur base du registre des consultations SchistoSAM.
  
- *Contact téléphonique par le patient*
  - *En cas de problème qui peut être résolu par un conseil téléphonique :*
    - Le **médecin** remplit un CRF « *Événements indésirables* » papier en cas des symptômes modérés ou sévères.
    - Transcription en eCRF ultérieurement.
  - *En cas de référence pour évaluation clinique :*
    - En cas d'évaluation par le **médecin** d'étude : le **médecin** remplit l'eCRF « *Événements indésirables* » en temps réel
    - En cas d'évaluation par le personnel de santé du centre de santé ou de l'hôpital de Richard Toll : le **médecin** remplit l'eCRF « *Événements indésirables* » sur base du registre des consultations SchistoSAM ou du dossier du patient.

### 4.2. Événements indésirables graves

Toutes les informations décrites pour les événements indésirables s'appliquent également aux événements indésirables graves.



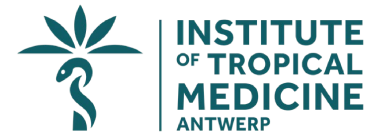

## Schisto/SOP/CLIN/02

Si lors d'un contact téléphonique le **médecin** soupçonne un effet indésirable grave, il fera tout ce qui est nécessaire, soit pour évaluer l'enfant lui-même le plus rapidement possible, soit pour faire évacuer l'enfant vers l'hôpital Richard Toll. (Voir ci-dessus) La collecte et rapport sera fait, soit au moment d'évaluation par le **médecin** d'étude, soit sur la base du dossier du patient à l'hôpital de Richard Toll, mais en tout cas le jour même de la notification.

Cependant, dans le cas d'un EIG, **le médecin** informera TOUJOURS LE PLUS VITE POSSIBLE l'investigateur principal et le co-investigateur médical du pays et en backup le coordinateur et la co-investigatrice médicale de l'IMT aux adresses email ([moustapha.mbouw@iressef.org](mailto:moustapha.mbouw@iressef.org): PI du pays ; [ebottieu@itg.be](mailto:ebottieu@itg.be) : coordinateur IMT ; [ibrosius@itg.be](mailto:ibrosius@itg.be); co-investigatrice médicale IMT).

Le PI créera par la suite un rapport EIG (lien formulaire, voir annexe). Ce formulaire devra être rempli dans la mesure du possible et envoyé au promoteur le plus vite possible, et certainement dans les 24 heures après avoir pris connaissance de l'événement à l'adresse suivante : [pharmacovigilance@itg.be](mailto:pharmacovigilance@itg.be).

Le rapport sera examiné par l'IMT et le comité de surveillance indépendant (CSI) et une rétroaction sera transmise à l'investigateur principal (IP) et au **médecin** du site.

Dès que plus d'informations seront disponibles, un rapport de suivi sera créé par le **médecin** sous supervision de l'IP et soumis de la même manière. L'IP devra assurer un suivi actif pour toute autre information et tout autre résultat de l'EIG.

### 4.3. Suivi des événements indésirables

Chaque épisode d'un événement indésirable est suivi jusqu'à la récupération finale. Pour chaque village, un relais communautaire est désigné, qui assurera le suivi quotidien des enfants ayant un événement indésirable par des visites à domicile. Celui tiendra au courant le médecin d'étude par téléphone. En cas de besoin, un contact physique avec le médecin sera organisé.

## 5. Prise en charge clinique des EI et des EIG

### 5.1. Cadre

Un événement indésirable peut ou non être lié à la prise du médicament à l'étude.

Le PZQ provoque des effets secondaires chez environ 50% des enfants traités (douleurs abdominales, prurit, sensation fébrile, asthénie,...), mais ils sont exclusivement légers à modérés. La plupart du temps ils s'estompent rapidement sans même nécessiter de traitement symptomatique.

L'AM est composé d'artésunate, en général très bien toléré, et de méfloquine. Ce médicament peut provoquer des vomissements (1-5% des enfants traités pour malaria) et des manifestations neuropsychiatriques le plus souvent modérées (vertiges, cauchemars, céphalées,...) et rarement (< 1%) graves (hallucinations, idéations suicidaires,...). La fréquence des effets secondaires est plus faible chez les enfants que chez les adultes. Pour rappel, le médicament est contre-indiqué en cas d'antécédents épileptiques ou psychiatriques sévères (voir le SOP « Schisto/SOP/CLIN/01).

### 5.2. Professionnel de santé responsable

La prise en charge des symptômes lors des visites de traitement est faite immédiatement sur place, par l'**infirmier** en cas des symptômes légers, ou par le **médecin** d'étude en cas des symptômes modérés ou sévères.

## Schisto/SOP/CLIN/02



Lors des visites (à J7 et lors des évaluations parasitologiques post-traitement) effectuées en principe par **des infirmiers**, les symptômes *en cours* d'une gravité au moins modérée seront communiqués au **médecin** par téléphone pour décider de la prise en charge (abstention ; traitement symptomatique sur le site ; évacuation à Richard Toll pour évaluation médicale complète).

En cas de doute, l'enfant devra être évalué cliniquement par un professionnel de santé qualifié. Dans un premier temps, ceci peut être fait par **l'infirmier** du centre de santé du village. Ce dernier consultera à nouveau **le médecin** après son évaluation. Si nécessaire, l'enfant sera transféré à l'hôpital de Richard Toll.

### 5.3. Prise en charge

Lors de la survenue des symptômes, il est **AUSSI** important **de vérifier quel traitement a été/est administré**, car certains médicaments interagissent avec l'AM. **Les infirmiers** disposeront d'une pharmacie d'urgence fournie par l'étude pour faire face à toute éventualité.

Pour les plaintes énumérées ci-dessous, les produits à utiliser pour un traitement symptomatique sont spécifiés (Tableau 2). Ce Tableau sera disponible dans tous les postes de santé des villages d'étude. *Evitez bien entendu d'utiliser un produit appartenant à la liste des médicaments non autorisés (risque d'interaction avec le traitement d'étude).*

| Symptôme/El                           | Prise en charge                                                                                                                                                                                                                                                                                                              |                                                                                                                                                                                                                                                                                                                                         |
|---------------------------------------|------------------------------------------------------------------------------------------------------------------------------------------------------------------------------------------------------------------------------------------------------------------------------------------------------------------------------|-----------------------------------------------------------------------------------------------------------------------------------------------------------------------------------------------------------------------------------------------------------------------------------------------------------------------------------------|
|                                       | Léger ou modéré                                                                                                                                                                                                                                                                                                              | Sévère                                                                                                                                                                                                                                                                                                                                  |
| <b>(Nausées et) vomissements</b>      | <ul style="list-style-type: none"> <li>- Vogalene selon besoin, 1 <a href="#">lyophilisat</a>, 1 ou 2 fois par jour</li> <li>- Observation ambulatoire</li> <li>- Arrêt de traitement à l'étude si vomissements répétés dans les 2 heures après l'administration</li> </ul>                                                  | <ul style="list-style-type: none"> <li>- Hydratation par ORS – 100-200ml/4h</li> <li>- Observation à l'hôpital de Richard Toll</li> </ul>                                                                                                                                                                                               |
| <b>Céphalées, myalgie, arthralgie</b> | <ul style="list-style-type: none"> <li>Paracétamol 15 mg/kg par 6 à 8h (max. 60 mg/jour)</li> </ul>                                                                                                                                                                                                                          | <ul style="list-style-type: none"> <li>Paracétamol 15 mg/kg par 6 à 8h (max. 60 mg/jour)</li> <li>Observation à l'hôpital de Richard Toll si absence d'amélioration après 2-3 heures (ou aggravation)</li> </ul>                                                                                                                        |
| <b>Convulsions</b>                    | <ul style="list-style-type: none"> <li>- Prise de signes vitaux</li> <li>- Protéger des traumatismes, maintenir les voies respiratoires ouvertes et dégagées, placer le patient en "position latérale de sécurité", desserrer les vêtements</li> <li>- Référence à l'hôpital de Richard Toll pour prise en charge</li> </ul> | <ul style="list-style-type: none"> <li><i>Crise généralisée &gt; 5 minutes</i></li> <li>- Protéger des traumatismes, maintenir les voies respiratoires ouvertes et dégagées, placer le patient en "position latérale de sécurité", desserrer les vêtements</li> <li>- Diazépam 0,15 – 0,2 mg/kg, par voie intraveineuse (max</li> </ul> |

## Schisto/SOP/CLIN/02



|               |                                                                                                                                                                                                                                                                                                                                                                                                                                                                 |                                                                                                                                                                                                                                                                                                                                                                                                                                                                   |
|---------------|-----------------------------------------------------------------------------------------------------------------------------------------------------------------------------------------------------------------------------------------------------------------------------------------------------------------------------------------------------------------------------------------------------------------------------------------------------------------|-------------------------------------------------------------------------------------------------------------------------------------------------------------------------------------------------------------------------------------------------------------------------------------------------------------------------------------------------------------------------------------------------------------------------------------------------------------------|
|               |                                                                                                                                                                                                                                                                                                                                                                                                                                                                 | 10mg/dose) à répéter une seule fois, après 10 min si nécessaire<br><br>- Référence <b>urgente</b> à l'hôpital de Richard Toll pour prise en charge                                                                                                                                                                                                                                                                                                                |
| <b>Fièvre</b> | - Paracétamol 15 mg/kg par 6 à 8h (max. 60 mg/jour)<br><br>- Référence au poste de santé pour TDR (test de diagnostic rapide) du paludisme ; suivre recommandation nationale de traitement du paludisme si TDR positif ; contacter <b>le médecin</b> de l'étude si TDR négatif pour le suivi<br><br>- Prélèvement d'une goutte de sang sur du papier filtre si possible pour détection de résistance (envoi à l'IMT via l'étude si TDR positif) (voir SOPLAB02) | - Paracétamol 15 mg/kg par 6 à 8h (max. 60 mg/jour)<br><br>- Référence à la poste de santé pour TDR (test de diagnostic rapide) du paludisme ; suivre recommandation nationale de traitement du paludisme si TDR positif ; contacter <b>le médecin</b> de l'étude si TDR négatif pour le suivi<br><br>- prélèvement d'une goutte de sang sur du papier filtre si possible pour détection de résistance (envoi à l'IMT via l'étude si TDR positif) (voir SOPLAB02) |

Tableau 2 : Traitement symptomatique

Le **médecin** ou infirmier remplira l'eCRF « Médicaments » au cas d'un traitement administré. Le médecin doit également décider de la suite du traitement à l'étude pour les participants dans le bras AM (voir le SOP « Schisto/SOP/CLIN/01).

Si un EIG est observé, les administrations d'AM prévues seront annulée, l'enfant est exclu de l'étude, la raison notée dans l'eCRF « **Fin étude** », et les soins nécessaires prodigués SOUS LA RESPONSABILITE COMPLETE DU MEDECIN DES QUE POSSIBLE (le jour même).

## 6. Détection des cas de paludisme

Durant toute la durée de l'étude, les cas de paludisme seront recueillis et enregistrés de manière spécifique.

Si une fièvre est en cours (mesure objective par le thermomètre ou rapport par le participant d'une fièvre, présente le jour de la visite) au moment d'une visite d'étude prévue, l'enfant sera envoyé au centre de santé pour évaluation et recherche de paludisme par TDR ; si ce test est positif, le eCRF « **Paludisme clinique** » sera rempli.

En principe, le **médecin** de l'étude devra aussi être informé immédiatement de tout enfant qui se présente à un centre de santé pendant l'étude avec de la fièvre. Si un test de paludisme est positif, le **médecin** de l'étude remplira le CRF « **Paludisme Clinique** » dans un CRF papier. L'information contenue dans le CRF papier doit être transcrite dans l'eCRF le plus tôt possible.

## Schisto/SOP/CLIN/02

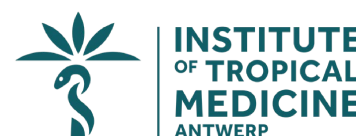

Lors des visites de suivi EI, les visites d'évaluation parasitologique et les visites d'administration du médicament à l'étude - J0 (à partir du deuxième administration) un eCRF « **Détection paludisme** » doit être complété afin de capturer les cas de paludisme qui n'ont pas été signalés spontanément de la manière précédente. Si le participant signale un diagnostic de paludisme depuis la visite précédente, l'eCRF « **Paludisme clinique** » doit également être rempli.

Tout doit être mis en œuvre pour obtenir plus d'informations sur le site où le participant a consulté (poste de santé, hôpital de Richard Toll ou autre). Notamment la date du début de la fièvre, la date du diagnostic, le test diagnostic utilisé, son résultat et le traitement pris devront être notés dans l'eCRF « **Paludisme clinique** ».

Schisto/SOP/CLIN/02

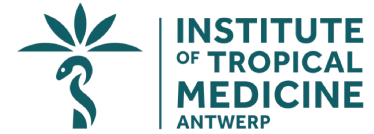

## 7. Organigramme pour collection, rapportage et prise en charge des EI(G)8.

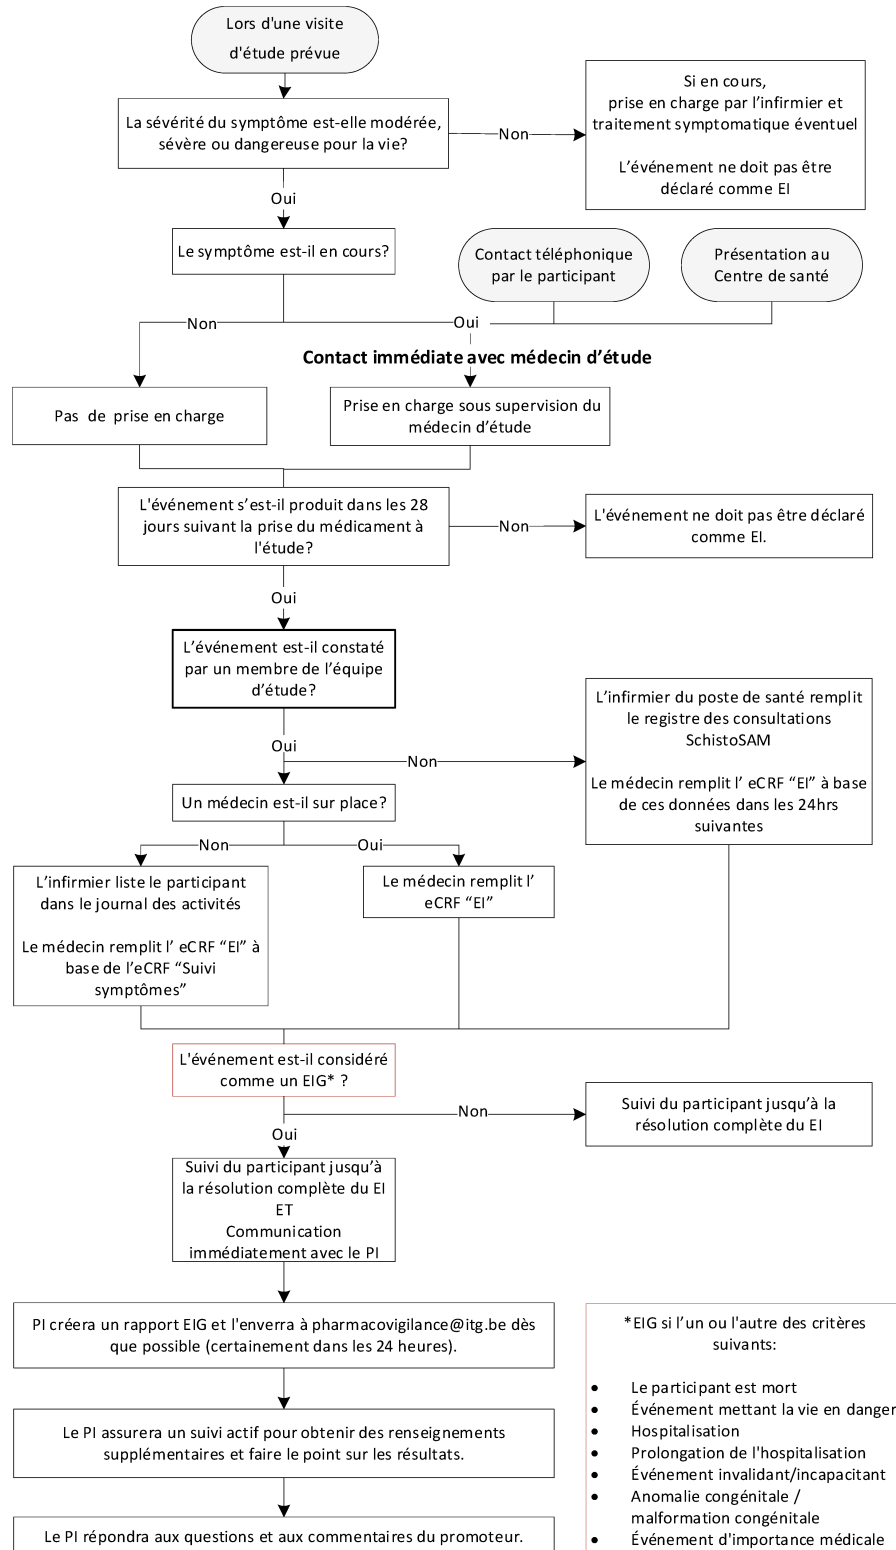

Schisto/SOP/CLIN/02

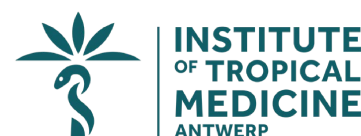
**INSTITUTE  
OF TROPICAL  
MEDICINE**  
ANTWERP

**Registres et archives**

| Annexes et Fiches à remplir |        |                                                        |
|-----------------------------|--------|--------------------------------------------------------|
| Document                    | Nombre | Titre                                                  |
| CRF                         | 13     | Suivi symptômes                                        |
|                             | 15     | Détection des cas de paludisme                         |
|                             | 16     | Tableau des cas de paludisme                           |
|                             | 17     | Tableau des événements indésirables                    |
| RAPPORT EIG                 |        | Formulaire de rapport d'événements indésirables graves |

| Revision    |                  |
|-------------|------------------|
| Version 1.0 | Version Initiale |
| Version 2.0 | Révision complet |

| Nom et fonction          | Date | Signature |
|--------------------------|------|-----------|
| <i>Auteur</i>            |      |           |
| <i>Isabel Brosius</i>    |      |           |
| <i>Révisé par</i>        |      |           |
| <i>Emmanuel Bottieau</i> |      |           |
| <i>Annelies De Hondt</i> |      |           |
