# Supplementary material for: Evaluation of Artesunate-mefloquine as a Novel Alternative Treatment for Schistosomiasis in African Children (SchistoSAM): protocol of a proof-of-concept, open-label, two-arm, individually-randomised controlled trial
Source: HighWire-hosted journal article supplement (doi:10.1136/bmjopen-2020-047147), 2021-06-01
Supplement: bmjopen-2020-047147supp003_data_supplement.pdf [file bmjopen-2020-047147supp003_data_supplement.pdf]

**Additional file 3****1. BROCHURE D'INFORMATION POUR LES PARENTS / TUTEURS  
DES ENFANTS PARTICIPANT A L'ETUDE SchistoSAM****Evaluation de l'artésunate-méfloquine comme traitement alternatif de la schistosomiase  
chez les enfants d'âge scolaire au Sénégal (SchistoSAM)**

Investigateur : Dr Moustapha Mbow  
Organisation : Institut de Recherche en Santé de Surveillance Épidémiologique et de Formation (IRESSEF)  
Promoteur : Institut de Médecine Tropicale, Anvers, Belgique  
Financement : Financement de la recherche structurelle ITM

Votre enfant est invité à participer à une étude sur le diagnostic et le traitement de la schistosomiase, une maladie parasitaire très fréquente dans votre région.

Dans ce document nous vous expliquons tout ce qui concerne la participation à cette étude. La participation est entièrement volontaire. Vous avez le droit de poser des questions à tout moment, de parler de cette étude à une personne à qui vous faites confiance et de prendre le temps de réfléchir. Si vous acceptez que votre enfant y participe, assurez-vous de conserver cette brochure d'information tout au long de la période d'étude.

**OBJECTIF ET DESCRIPTION DE L'ETUDE**

La schistosomiase, aussi appelée bilharziose, est une maladie causée par un ver appelé schistosome qui pénètre dans la peau lors de contacts avec de l'eau douce contaminée (lacs, fleuves, étangs,...). Dans le corps, le ver pond des œufs, qui affectent principalement certains de vos organes et peuvent entraîner des troubles digestifs (douleur abdominale, diarrhée, manque d'appétit), mais aussi une anémie, de la malnutrition et un retard de croissance.

Pour le moment, il n'y a qu'un seul médicament pour traiter la schistosomiase : le praziquantel. Ce médicament n'est toutefois pas complètement efficace et il y a un risque que les parasites deviennent résistants à ce traitement dans le futur. Dans cette étude, nous voulons évaluer un traitement alternatif : l'artésunate-méfloquine qui est déjà utilisé pour le traitement du paludisme. Il semble que ce médicament pourrait être aussi efficace contre la schistosomiase, et le but de cette étude est de déterminer si c'est le cas (ou non).

Avant de donner un traitement, il faut évidemment faire le diagnostic. A l'heure actuelle, le diagnostic repose sur la recherche d'œufs du parasite dans les selles et les urines au microscope, ce qui est difficile et prend beaucoup de temps. C'est la raison pour laquelle nous souhaiterions aussi évaluer des méthodes plus faciles et plus rapides pour détecter les enfants infectés.

Pour atteindre ces objectifs, nous comparerons les différentes méthodes diagnostiques et les deux traitements chez 690 enfants infectés : 345 enfants seront traités avec le praziquantel et 345 autres enfants avec l'artésunate-méfloquine.

Par la même occasion, nous souhaiterions savoir si votre enfant porte les parasites du paludisme dans son sang. En effet une personne peut avoir les parasites mais ne pas développer la maladie. De plus, il a été observé que les parasites responsables du paludisme peuvent développer une résistance au médicament

et c'est ce que nous aimerions aussi évaluer au cours de notre étude. Le paludisme comme la schistosomiase cause de l'anémie que nous mesurerons également chez votre enfant. L'école de votre enfant a été sélectionnée pour l'étude parce qu'elle se situe dans une région où il y a beaucoup de schistosomiase et qu'elle se trouve près de Richard Toll, d'où l'étude est coordonnée.

### SELECTION DES ENFANTS

Les critères suivants devront être remplis pour la participation à l'étude :

- Vous et votre enfant acceptez de participer
- Votre enfant est infecté par les schistosomes
- Votre enfant ne présente pas de contre-indications au traitement

Dans ce but il nous sera nécessaire de :

- Avoir des informations sur les antécédents médicaux de votre enfant et sur les médicaments qu'il prend éventuellement
- Avoir des échantillons d'urine, de selles et quelques gouttes de sang de votre enfant

Si votre enfant est infecté, mais qu'il ne répond pas à tous les critères pour participer à l'étude, il recevra le traitement habituel à base de praziquantel gratuitement.

Si votre enfant peut participer à l'étude, le médicament qu'il recevra sera choisi au hasard : soit le praziquantel, soit l'artésunate-méfloquine, et vous en serez informé. A la fin de l'étude, tous les enfants qui seront encore infectés recevront le traitement habituel, c'est-à-dire le praziquantel.

### CALENDRIER DE L'ETUDE

Si votre enfant participe, il doit être présent à tous les rendez-vous décrits ci-dessous. Les examens seront faits dans un endroit prévu à cet effet, à l'école ou au poste de santé le plus proche. Vous recevrez un rappel quelques jours avant. Si votre enfant n'est pas présent au cours d'une visite, nous vous contacterons par téléphone ou nous nous rendrons chez vous afin de continuer le programme prévu.

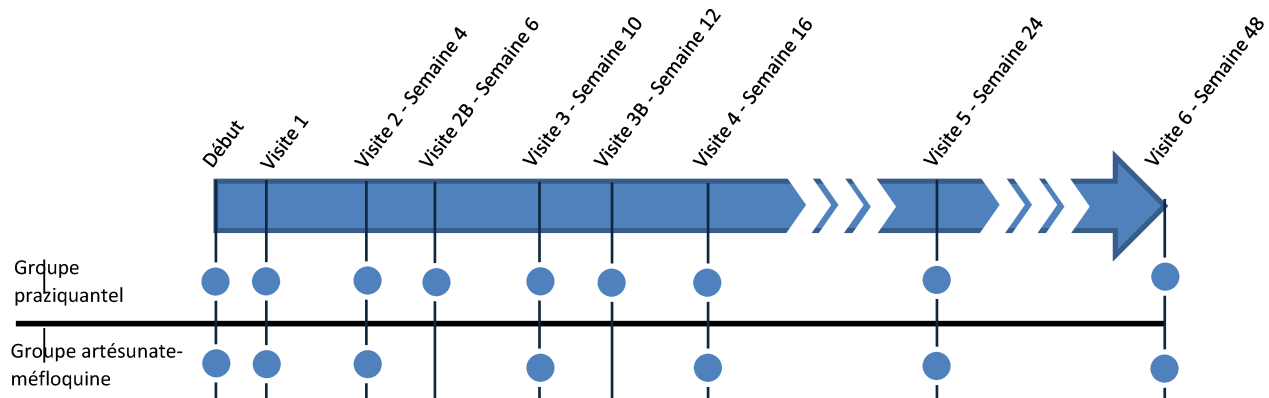

#### Visite 1 : Recrutement et 1<sup>ère</sup> administration du médicament à l'étude

- Le médecin examinera votre enfant et vous posera quelques questions sur lui et sur sa santé
- L'échographiste fera une échographie du ventre de votre enfant
- Votre enfant recevra des récipients pour donner deux échantillons de selles et deux échantillons d'urine
- Votre enfant donnera une très petite quantité de sang, par piqûre au bout du doigt
- Votre enfant prendra le médicament devant le médecin ou l'infirmier de l'étude. Si votre enfant reçoit l'artésunate-méfloquine, il devra revenir le lendemain et le surlendemain pour une deuxième et troisième dose.

**Visite 2, 3 et 4 : 1<sup>ère</sup>, 2<sup>ème</sup> et 3<sup>ème</sup> évaluation parasitologique**

- Votre enfant devra répondre à quelques questions sur sa santé
- Votre enfant recevra des récipients pour donner deux échantillons de selle et deux échantillons d'urine

**Visite 2B et 3B: 2<sup>ème</sup> et 3<sup>ème</sup> administration du médicament à l'étude** (seulement pour les enfants qui reçoivent l'artésunate-méfloquine)

- Le médecin examinera votre enfant et vous posera quelques questions sur sa santé
- Votre enfant prendra le médicament. Il doit également revenir le lendemain et le surlendemain pour une deuxième et troisième dose.

Une semaine après chaque administration du médicament, vous serez contacté afin de savoir si votre enfant a été malade suite à cela.

Parce que nous voulons étudier l'effet des médicaments à long terme, nous demanderons à votre enfant de revenir de nouveau à deux reprises, une fois à 6 mois après le début de l'étude et une dernière fois à 12 mois.

**Visite 5 et 6 (6 et 12 mois après visite 1) : Evaluation clinique intermédiaire et Evaluation clinique finale**

- Le médecin examinera votre enfant et vous posera quelques questions sur sa santé
- L'échographe fera une échographie du ventre de votre enfant
- Votre enfant recevra des récipients pour donner deux échantillons de selles et deux échantillons d'urine
- Votre enfant donnera une très petite quantité de sang, par piqûre au bout du doigt

Si au cours de l'étude, votre enfant tombe malade, quelle qu'en soit la raison, nous mettons à votre disposition un numéro d'urgence pour contacter l'équipe de recherche dès que possible. Nous ferons tous les efforts pour vous aider et vous orienter vers une prise en charge adéquate et un traitement si nécessaire dans un centre de santé proche. Si vous vous rendez au centre de santé avec votre enfant, n'oubliez pas d'emporter cette brochure d'information avec vous pour que le personnel de santé puisse bien identifier que votre enfant participe à l'étude. Vous pouvez aussi contacter ce numéro au cas où vous auriez une question urgente liée à l'étude.

**Numéro : +221 775330168**

**CONSERVATION DES ECHANTILLONS**

Les échantillons de sang, de selles et d'urine seront envoyés à l'Institut de Médecine Tropicale en Belgique pour des analyses plus approfondies. En plus, si vous êtes d'accord, nous conserverons également ces échantillons pendant 50 ans au maximum, pour qu'ils puissent servir à de futures recherches scientifiques qui seront préalablement approuvées par des Comités d'Ethique belge et sénégalais.

Sur la page de signature, vous pouvez indiquer si vous acceptez ou non ces recherches futures sur les échantillons de votre enfant. Même si vous n'acceptez pas, vous pouvez tout de même participer à l'étude. Les échantillons ne seront pas vendus ni utilisés à des fins commerciales.

**RISQUES ET DESAGREMENTS**

Comme décrit ci-dessus, le seul inconfort que votre enfant puisse ressentir est la piqûre au doigt lors du prélèvement de sang. Le volume prélevé sera minimal, et n'affectera donc pas la santé de votre enfant. Les autres examens ne sont pas douloureux.

Tout d'abord, nous voulons bien rappeler que l'efficacité du médicament d'étude (artésunate-méfloquine) n'est pas encore connue.

Les effets secondaires potentiels des médicaments sont rares et en général modérés. Pour le praziquantel il peut s'agir de maux de tête, de douleurs abdominales, de fatigue, de douleurs articulaires/musculaires, de perte d'appétit, de vomissements et de sensation de fièvre. Pour l'artésunate-méfloquine, des problèmes de type nausée-vomissements sont possibles ainsi que de très rares réactions neuropsychiatriques (vertige, trouble de la concentration ou convulsion).

Bien entendu, si un problème de santé survient chez votre enfant au cours de l'étude, il est important de nous contacter dès que possible au numéro ci-dessus ou de vous rendre au poste de santé le plus proche, où les infirmiers contacteront le médecin-investigateur local. S'il apparaît après l'évaluation médicale que le problème est associé à un effet secondaire d'un des médicaments de l'étude, les frais éventuels de diagnostic et de traitement seront pris en charge par l'étude.

### **AVANTAGES**

Par cette étude, votre enfant aura un diagnostic précoce et un traitement gratuits de la schistosomiase et de ses éventuelles complications. De plus, si pendant l'étude votre enfant présente une pathologie sévère, il/elle sera référé(e) à un centre de santé pour des soins appropriés.

Votre enfant recevra le Praziquantel au cours de la visite 6 à la fin de l'étude quel que soit le médicament qu'il a reçu au cours de l'étude. De plus, selon les résultats obtenus du taux d'infection chez les enfants d'âge scolaire dans votre village, il se peut qu'un traitement médicamenteux de masse au Praziquantel soit également fourni au reste des villageois (une activité qui sera effectuée sous la coordination du programme national de lutte contre la schistosomiase).

La participation de votre enfant nous permettra aussi d'informer rapidement les experts internationaux afin d'améliorer la prise en charge de la schistosomiase dans le futur.

### **CONSTATATIONS INCIDENTES**

Pour les besoins de l'étude, votre enfant subira des examens de laboratoire incluant le diagnostic de la schistosomiase et du paludisme. Si ces tests détectent une maladie grave, vous serez informé de la nature et de la signification des résultats et votre enfant sera référé à un spécialiste pour un meilleur suivi.

Les autres données visent à évaluer l'efficacité du traitement et des nouveaux tests de dépistage de la schistosomiase et ne présentent pas d'information pouvant renseigner sur l'état de santé de votre enfant. Il convient de noter que le coût des soins médicaux suite à des découvertes incidentes, le cas échéant, ne sera pas soutenu par ce projet.

### **ASSURANCE**

L'organisateur de cette étude, l'Institut de Médecine Tropicale, a souscrit à une assurance pour couvrir tout préjudice ou blessure possible pouvant être causés par la participation à cette étude.

### **PROTECTION DE VOTRE VIE PRIVEE**

Les informations médicales obtenues seront traitées de manière strictement confidentielle. Ces informations seront ensuite conservées dans une base de données électronique, où elles seront identifiées par un code et non plus par le nom de votre enfant. Les documents sur lesquels votre nom apparaît ne seront communiqués à personne, hormis les chercheurs de l'étude, votre médecin, le personnel de santé de votre centre de santé et quelques autres personnes qui seront tenues d'en garantir la confidentialité, notamment des représentants de l'Institut de Médecine Tropicale. En signant ce formulaire de consentement éclairé, vous acceptez ces conditions d'accès.

Les résultats de l'étude seront publiés dans des revues médicales et les données anonymes pourront être partagées dans une base de données internationale. Le nom de votre enfant n'apparaîtra dans aucune base de données, publication ou rapport résultant de cette étude.

**COMITE D'ETHIQUE**

Avant son lancement, cette étude a été vérifiée et approuvée par les Comités d'Éthique de l'Institut de Médecine Tropicale, de l'hôpital universitaire d'Anvers et par le Comité National d'Éthique pour la Recherche en Santé au Sénégal. Ces comités assureront également une vérification continue de l'étude pour garantir sa réalisation dans les meilleures conditions.

Vous pouvez toujours contacter le Comité National d'Éthique pour la Recherche en Santé au Sénégal au +221 773614212.

**PARTICIPATION VOLONTAIRE**

La participation de votre enfant à cette étude est entièrement volontaire. Vous êtes entièrement libre de choisir d'y participer ou non.

Vous avez également le droit de vous retirer de l'étude à tout moment si vous le désirez, même après avoir signé ce formulaire de consentement éclairé et sans donner de justificatif. Cette décision n'affectera pas les conseils et soins médicaux que vous recevrez.

Le chercheur associé à l'étude peut également interrompre la participation de votre enfant à tout moment, même sans votre accord, s'il/elle estime que cette interruption est dans le meilleur intérêt de votre enfant ou si vous ne suivez pas les instructions de participation à l'étude malgré plusieurs rappels.

## 2. BROCHURE D'INFORMATION POUR LES ENFANTS DE 6 A 14 ANS PARTICIPANT A L'ÉTUDE SchistoSAM

### Evaluation de l'artésunate-méfloquine comme traitement alternatif de la schistosomiase chez les enfants d'âge scolaire au Sénégal (SchistoSAM)

Investigateur : Dr Moustapha Mbow  
Organisation : Institut de Recherche en Santé de Surveillance Épidémiologique et de Formation (IRESSEF)  
Promoteur : Institut de Médecine Tropicale, Anvers, Belgique  
Financement : Financement de la recherche structurelle ITM

Nous effectuons une recherche sur une maladie fréquente dans ta région, qu'on appelle schistosomiase. Il s'agit d'un ver que les enfants peuvent attraper en jouant dans l'eau des rivières et des mares. Nous essayons d'améliorer la manière de trouver ces vers dans ton corps et de soigner cette maladie. Aujourd'hui pour trouver le ver on doit regarder (au microscope) dans les urines et les selles. On essaie de trouver des moyens plus faciles. Pour soigner, on utilise un médicament, le praziquantel que tu as probablement déjà reçu à l'école. Nous voulons voir si un autre médicament l'artésunate-méfloquine, qu'on utilise déjà pour le paludisme, peut aussi soigner la schistosomiase.

Nous allons donc, si tu es d'accord, examiner tes urines et tes selles pour rechercher le ver. Nous allons aussi le faire chez tous les enfants de ton école. Si nous trouvons le ver de la schistosomiase, nous te donnerons un médicament, soit le praziquantel, celui qu'on donne d'habitude, une seule fois, soit l'artésunate-méfloquine, celui qu'on veut essayer, 1 fois par jour pendant 3 jours.

Pour bien observer si le médicament fonctionne, et pendant combien de temps, on examinera à nouveau tes selles et tes urines toutes les 6 semaines puis après 6 mois et après un an. On te fera une petite piqûre au doigt tous les 6 mois comme on le fait quand on cherche le paludisme chez un enfant malade. Un médecin t'examinera également et te posera quelques questions sur ta santé. Tu devras lui dire si tu ne te sens pas bien avec le traitement, et lui expliquer tes symptômes. Il prendra bien soin de toi comme ça. Et finalement on regardera ton ventre plusieurs fois avec une machine (qu'on appelle échographie) qui ne fait pas mal du tout.

L'étude durera 1 an au total et, à la fin, tous les enfants de l'étude recevront le praziquantel, le traitement habituel.

Lorsque nous aurons terminé la recherche, nous écrirons un rapport sur ce que nous avons appris, mais on n'y parlera pas du tout de toi ou des autres enfants.

Tu ne dois pas hésiter à poser encore des questions si tu n'as pas tout compris. Tu n'es pas du tout obligé de participer à l'étude si tu ne veux pas. Si tu décides d'arrêter après que nous ayons commencé, ce n'est pas grave non plus et même si tes parents (ou ton tuteur) ont accepté que tu y participes mais que tu ne veux pas, nous respecterons ton choix.

Nous te demanderons si tu es d'accord ou non de participer à l'étude et nous le noterons sur ce document. Tes parents (ou ton tuteur) signeront le document, après avoir reçu l'explication donnée par la fiche d'information pour adultes.

Si tu as des questions plus tard, tu peux toujours contacter le numéro ci-dessous :

**Numéro : +221 775330168**

### 3. FORMULAIRE DE CONSENTEMENT ÉCLAIRÉ

#### Evaluation de l'artésunate-méfloquine comme traitement alternatif de la schistosomiase chez les enfants d'âge scolaire au Sénégal (SchistoSAM)

J'ai été informé à propos de l'étude et j'ai reçu une copie de la brochure d'information pour les participants à l'étude et du formulaire de consentement éclairé. L'étude m'a été expliquée de manière claire et j'ai reçu suffisamment d'informations. J'ai eu suffisamment de temps pour consulter les informations et poser des questions pour lesquelles j'ai reçu des réponses satisfaisantes.

J'accepte librement que mon enfant participe à cette étude. J'accepte de coopérer aux examens/activités liés à l'étude. J'accepte de fournir des informations concernant le passé médical et la situation médicale actuelle de mon enfant.

Si je souhaite interrompre la participation, même après avoir signé le consentement éclairé, je sais que je suis en droit de le faire.

J'accepte que mon médecin ou d'autres professionnels de santé impliqués dans mon traitement soient informés sur ma participation à cette étude.

#### À compléter par le parent/tuteur du participant

J'accepte que mon enfant participe à cette étude :  Oui  Non

J'accepte que les échantillons de mon enfant soient conservés pendant 50 ans après la fin de cette étude et puissent être utilisés pour de futures recherches scientifiques :  Oui  Non

J'accepte d'être informé(e) de découverte incidente :  Oui  Non

Nom de l'enfant : \_\_\_\_\_

Nom du parent/tuteur: \_\_\_\_\_ Relation avec le participant : \_\_\_\_\_

Date: \_\_\_\_\_ Signature: \_\_\_\_\_

#### À compléter par le témoin (si le parent/tuteur du participant est illettré)

Nom du témoin: \_\_\_\_\_

Date: \_\_\_\_\_ Signature: \_\_\_\_\_

#### A compléter par la personne ayant obtenu le consentement éclairé

Je soussigné(e) \_\_\_\_\_ confirme avoir informé le participant et ses parents/son tuteur sur tous les aspects pertinents de cette étude. Je confirme que les parents/le tuteur ont/a librement et volontairement consenti(s) de participer à l'étude.

Date: \_\_\_\_\_ Signature: \_\_\_\_\_

Assentiment verbal de l'enfant :  Oui  Non

Code d'étude du participant : \_\_\_\_\_

#### A compléter par le médecin de l'étude (si différent de la personne qui a obtenu le consentement)

Je soussigné(e) \_\_\_\_\_ confirme d'avoir expliqué l'étude aux parents/le tuteur et qu'ils ont reconfirmé la participation à l'étude.

Date: \_\_\_\_\_ Signature: \_\_\_\_\_
